# Supplementary material for: Enzyme-containing spin membranes for rapid digestion and characterization of single proteins
Source: Royal Society of Chemistry journal article supplement (doi:10.1039/c8an00969d), 2018-01-01
Supplement: c8an00969d1.pdf [file c8an00969d1.pdf]

# Electronic Supplementary Information for

## Enzyme-Containing Spin Membranes for Rapid Digestion and Characterization of Single Proteins

Weijing Liu <sup>†,a</sup>, Yongle Pang <sup>†,b</sup>, Hui-Yin Tan<sup>a</sup>, Nitin Patel<sup>c</sup>, Gia Jokhadze<sup>c</sup> Adrian Guthals and Merlin

L. Bruening<sup>\*,a,d</sup>

<sup>a</sup>Department of Chemistry and Biochemistry, University of Notre Dame, Notre Dame, Indiana 46556, United States

<sup>b</sup>Department of Chemistry, Michigan State University, East Lansing, Michigan 48824, United States

<sup>c</sup>Takara Bio, Inc, Mountain View, California 94043, United States

<sup>d</sup>Department of Chemical and Biomolecular Engineering, University of Notre Dame, Notre Dame, Indiana 46556, United States

† Authors contributed to this paper equally.

\*Email: mbruenin@nd.edu. Phone: (574)631-3024

|                                                                                                                  |             |
|------------------------------------------------------------------------------------------------------------------|-------------|
| Part of the mass spectrum of a tryptic spin digest of apomyoglobin.....                                          | Figure S-1  |
| Sequence map of the peptides identified from infusion ESI-Orbitrap analysis of a peptic digest of Herceptin..... | Figure S-2  |
| Sequence map of the peptides identified from infusion ESI-Orbitrap analysis of a peptic digest of Avastin.....   | Figure S-3  |
| Sequence map of the peptides identified from infusion ESI-Orbitrap analysis of a peptic digest of Rituxan.....   | Figure S-4  |
| Sequence map of the peptides identified from infusion ESI-Orbitrap analysis of a peptic digest of Vectibix.....  | Figure S-5  |
| Part of the mass spectrum of a peptic spin digest of Herceptin.....                                              | Figure S-6  |
| Part of the mass spectrum of a peptic spin digest of Avastin.....                                                | Figure S-7  |
| Part of the mass spectrum of a peptic spin digest of Rituxan.....                                                | Figure S-8  |
| Part of the mass spectrum of a peptic spin digest of Vectibix.....                                               | Figure S-9  |
| Mass spectra of 3 different spin-membrane digests of Avastin.....                                                | Figure S-10 |

Mass spectra from three consecutive peptic spin digests of Avastin with the same spin membrane.....Figure S-11

Gel electrophoresis (SDS-PAGE) analysis of the reusability of a pepsin spin membrane .....Figure S-12

Part of the mass spectrum of a tryptic spin digest of Herceptin.....Figure S-13

Part of the mass spectrum of a tryptic spin digest of Avastin.....Figure S-14

Part of the mass spectrum of a tryptic spin digest of Rituxan.....Figure S-15

Part of the mass spectrum of a tryptic spin digest of Vectibix.....Figure S-16

Sequence map of the peptides identified from infusion ESI-Orbitrap analysis of a tryptic spin digest of Herceptin.....Figure S-17

Sequence map of the peptides identified from infusion ESI-Orbitrap analysis of a tryptic spin digest of Avastin.....Figure S-18

Sequence map of the peptides identified from infusion ESI-Orbitrap analysis of a tryptic spin digest of Rituxan.....Figure S-19

Gel electrophoresis (SDS-PAGE) analysis of the reusability of a trypsin spin membrane .....Figure S-20

Infusion-MS spectra from three consecutive tryptic spin digests of Avastin with the same spin membrane.....Figure S-21

Gel electrophoresis analysis of tryptic (TPCK-treated) in-solution He and Av digests obtained with different incubation times.....Figure S-22

Gel electrophoresis analysis of tryptic in-solution digestion of Apomyoglobin with different incubation times.....Figure S-23

Mass spectra of tryptic in-solution apomyoglobin digests obtained with different incubation times.....Figure S-24

Intensities of peptide ions (nanoLC-MS/MS) from tryptic spin digests of 1, 5, 10, 25, 50, and 100 ng of He in 0.1 mL. ....Figure S-25

Apomyoglobin peptides identified from a spin-membrane (spun at 500 g) peptic digest ..... Table S-1

Apomyoglobin peptides identified from a spin-membrane (spun at 10,000 g) peptic digest.....Table S-2

|                                                                                                                   |            |
|-------------------------------------------------------------------------------------------------------------------|------------|
| Apomyoglobin peptides identified from a spin-membrane (spun at 500 g) tryptic digest.....                         | Table S-3  |
| Light- and heavy-chain peptides identified from a spin-membrane (spun at 500 g) peptic digest of Herceptin .....  | Table S-4  |
| Light- and heavy-chain peptides identified from a spin-membrane (spun at 500 g) peptic digest of Avastin .....    | Table S-5  |
| Light- and heavy-chain peptides identified from a spin-membrane (spun at 500 g) peptic digest of Rituxan .....    | Table S-6  |
| Light- and heavy-chain peptides identified from a spin-membrane (spun at 500 g) peptic digest of Vectibix .....   | Table S-7  |
| Yields of peptides from spin membranes and in-solution digestion.....                                             | Table S-8  |
| Light- and heavy-chain peptides identified from a spin-membrane (spun at 500 g) tryptic digest of Herceptin ..... | Table S-9  |
| Light- and heavy-chain peptides identified from a spin-membrane (spun at 500 g) tryptic digest of Avastin .....   | Table S-10 |
| Light- and heavy-chain peptides identified from a spin-membrane (spun at 500 g) tryptic digest of Rituxan .....   | Table S-11 |
| Light- and heavy-chain peptides identified from a spin-membrane (spun at 500 g) tryptic digest of Vectibix .....  | Table S-12 |
| Light- and heavy-chain peptides identified from an in-solution peptic digest of Herceptin .....                   | Table S-13 |
| Light- and heavy-chain peptides identified from an in-solution peptic digest of Avastin .....                     | Table S-14 |
| Light- and heavy-chain peptides identified from an in-solution peptic digest of Rituxan .....                     | Table S-15 |
| Light- and heavy-chain peptides identified from an in-solution peptic digest of Vectibix .....                    | Table S-16 |
| Light- and heavy-chain peptides identified from an in-solution tryptic digest of Herceptin .....                  | Table S-17 |
| Light- and heavy-chain peptides identified from an in-solution tryptic digest of Avastin .....                    | Table S-18 |

Light- and heavy-chain peptides identified from an in-solution tryptic digest of  
Rituxan .....Table S-19

Light- and heavy-chain peptides identified from an in-solution tryptic digest of  
Vectibix .....Table S-20

Herceptin sequence coverage from tryptic spin digestion of 0.1 mL solutions containing  
different amounts of antibody .....Table S-21

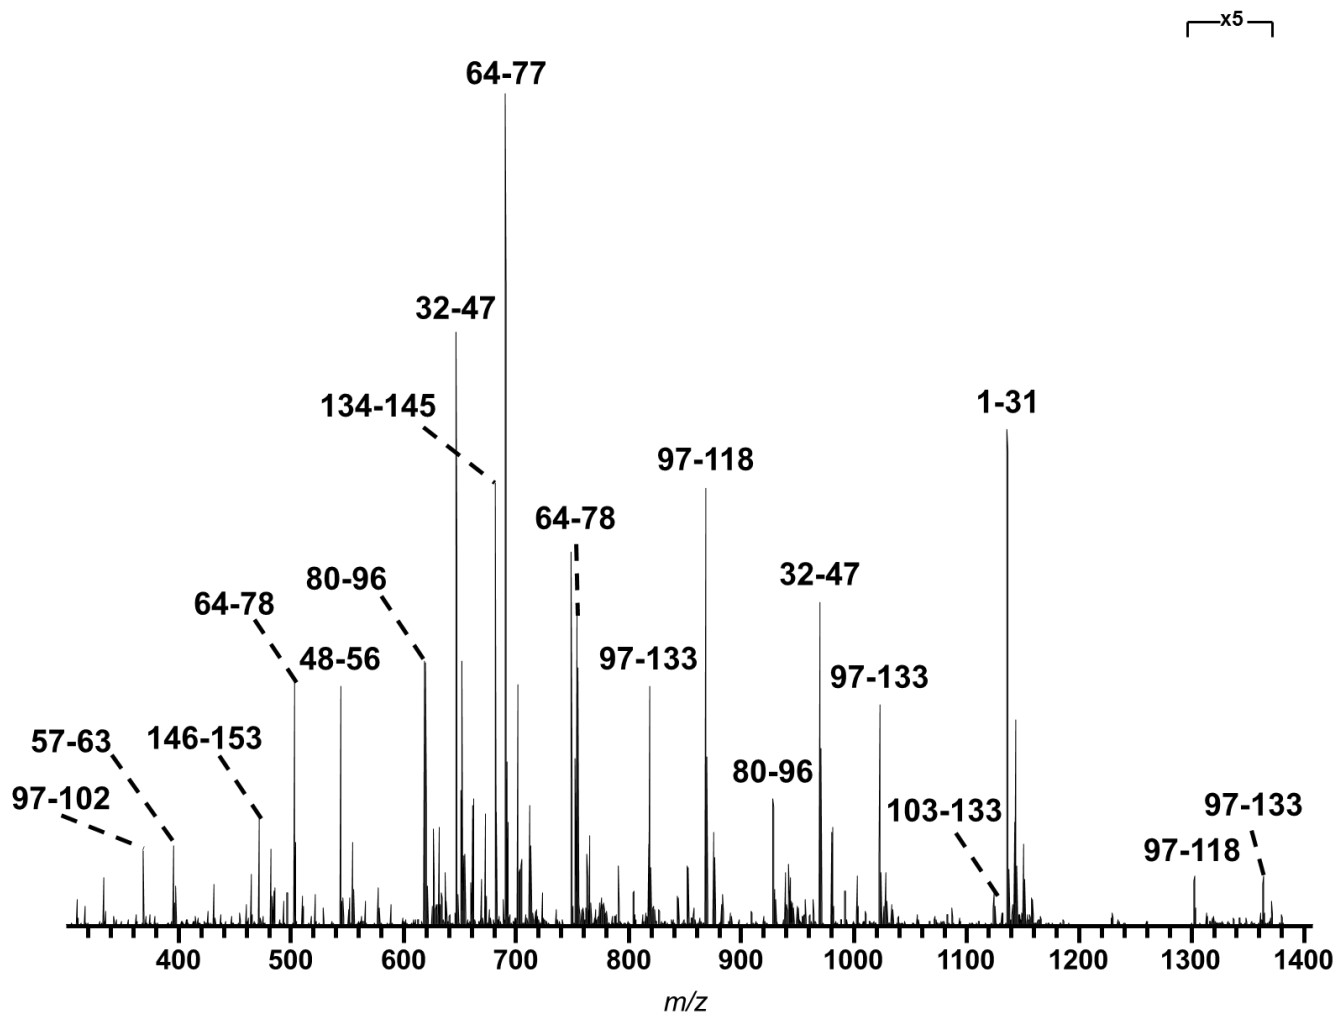

**Figure S-1.** Part of the mass spectrum of a tryptic spin digest (spun at 500 *g*) of apomyoglobin. Labels show the amino acids in the sequence (not all of the peptide signals are labelled)

## Herceptin Pepsin Proteolysis

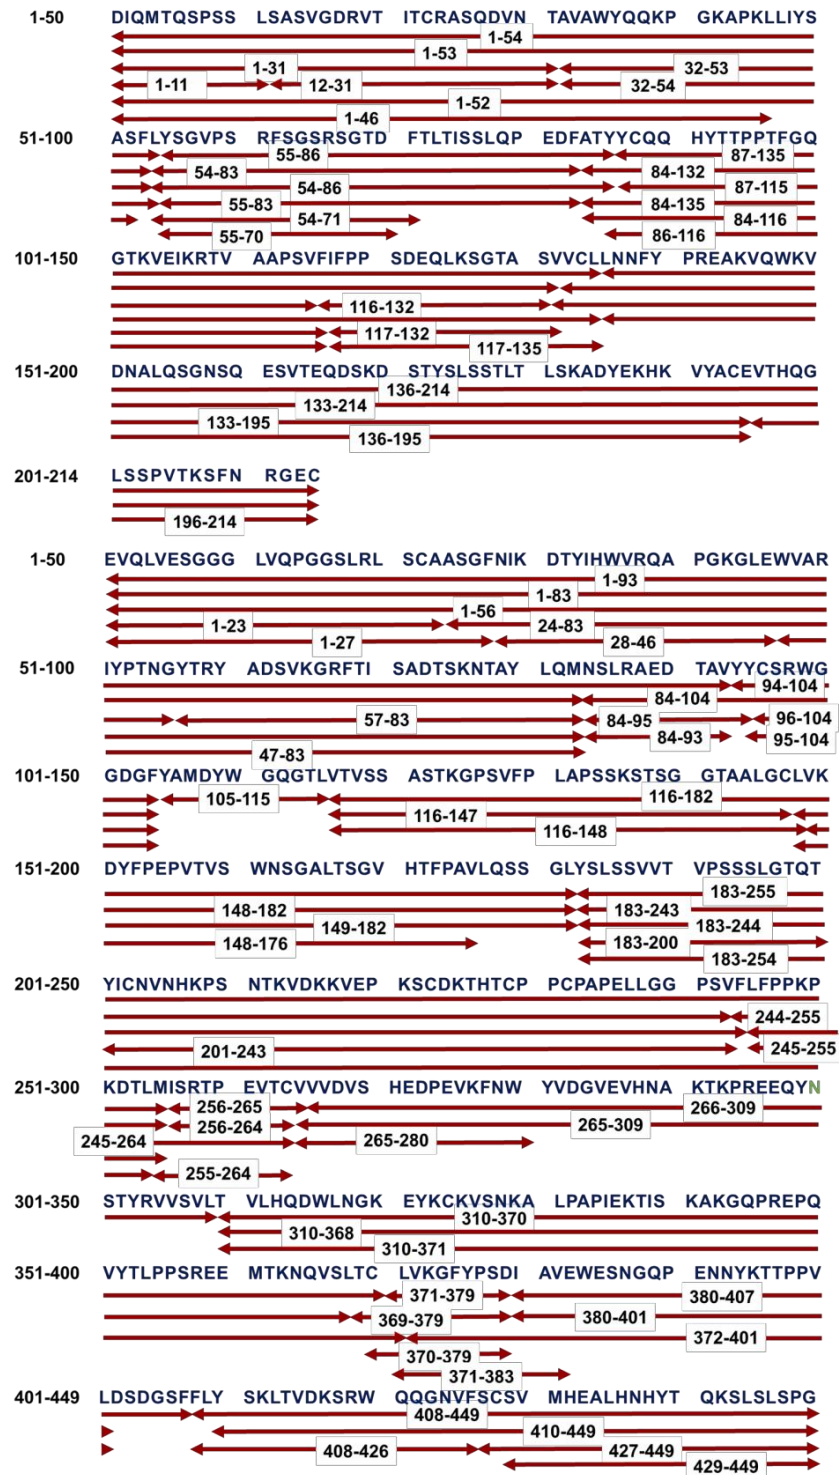

**Figure S-2.** Sequence map of the peptides identified from infusion ESI-Orbitrap analysis of an in-membrane peptic digest of Herceptin. The light green “N” represents the glycosylation site.

### Avastin Pepsin Proteolysis

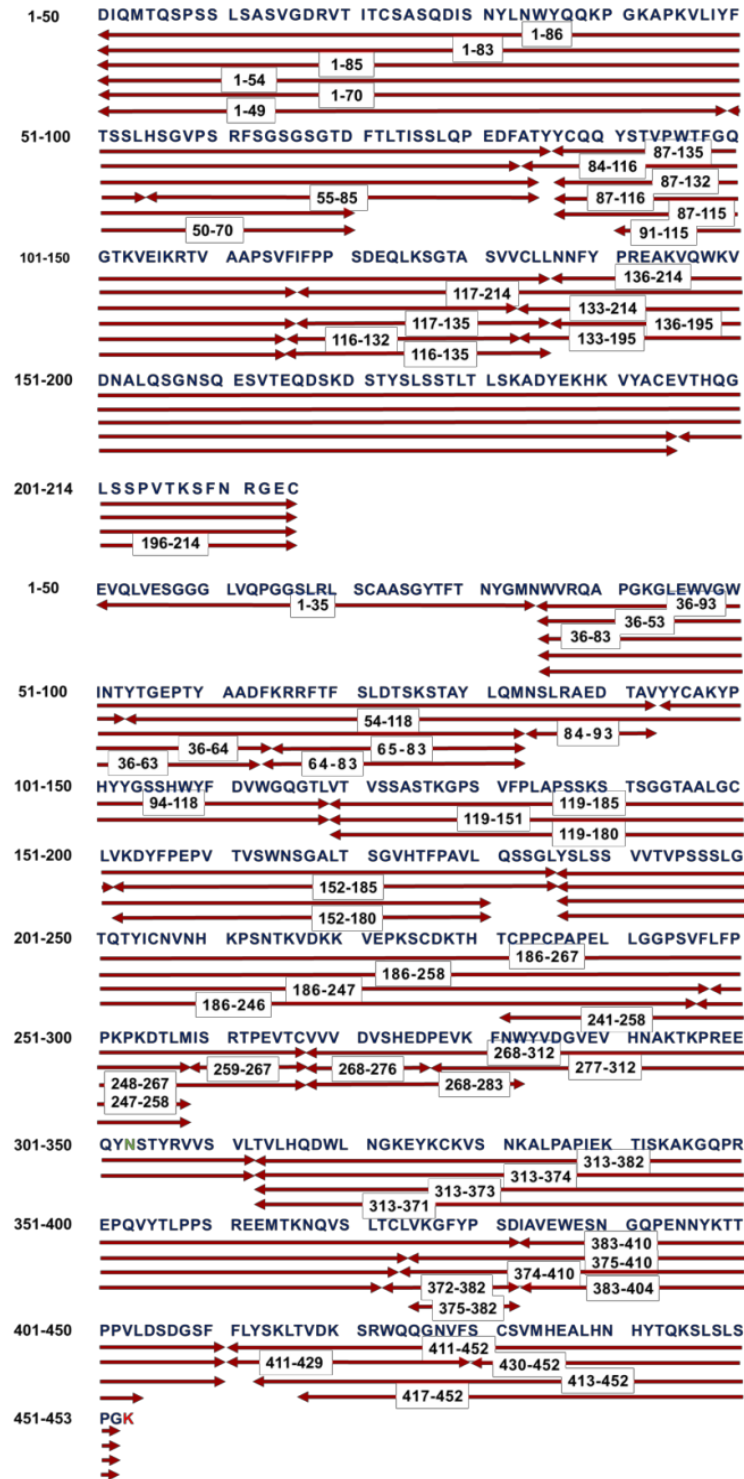

**Figure S-3.** Sequence map of the peptides identified from infusion ESI-Orbitrap analysis of an in-membrane peptic digest of Avastin. The light green “N” represents the glycosylation site, and the red “K” denotes the C-terminal lysine clipping.

### Rituxan Pepsin Proteolysis

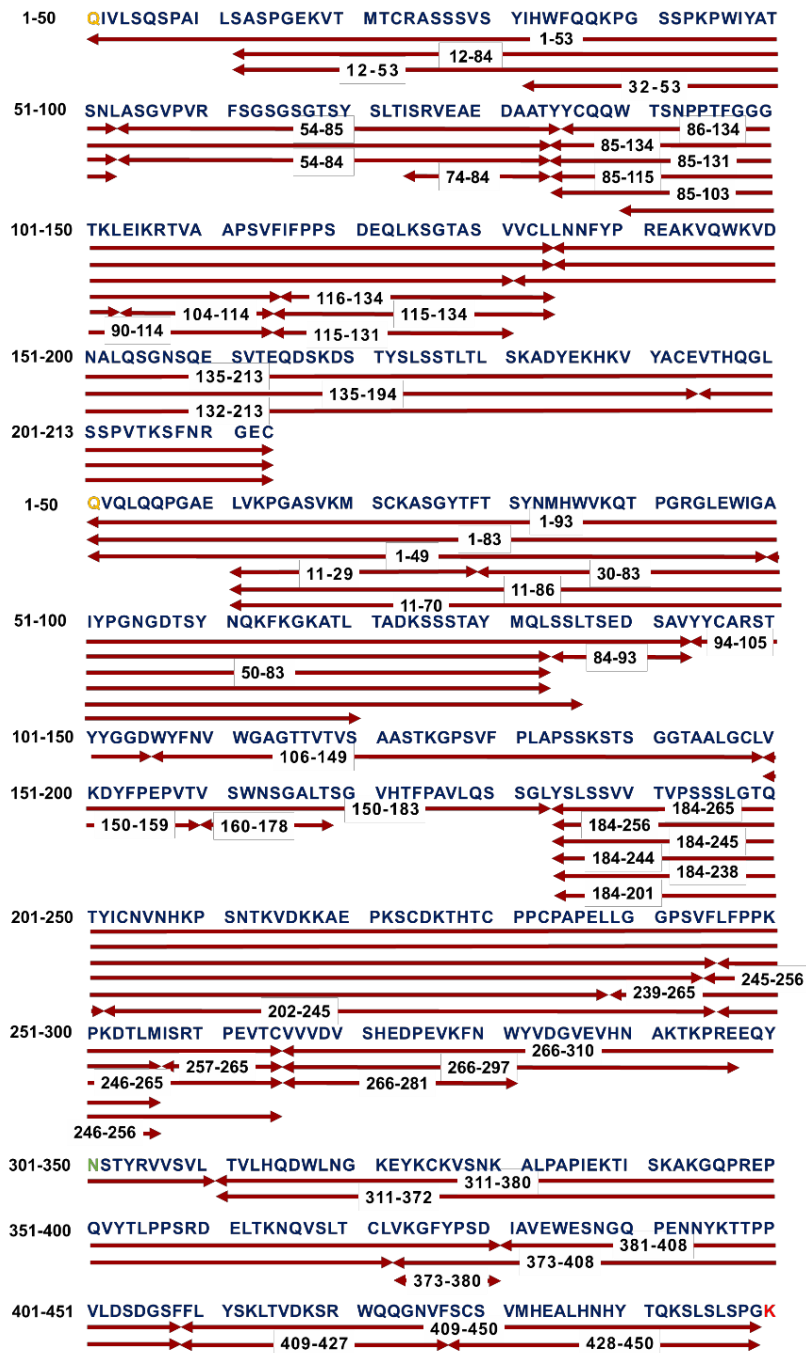

**Figure S-4.** Sequence map of the peptides identified from infusion ESI-Orbitrap analysis of an in-membrane peptic digest of Rituxan. The orange “Q” indicates N-terminal pyroglutamate formation, the light green “N” denotes the glycosylation site, and the red “K” represents the C-terminal lysine clipping.



### Vectibix Pepsin Proteolysis

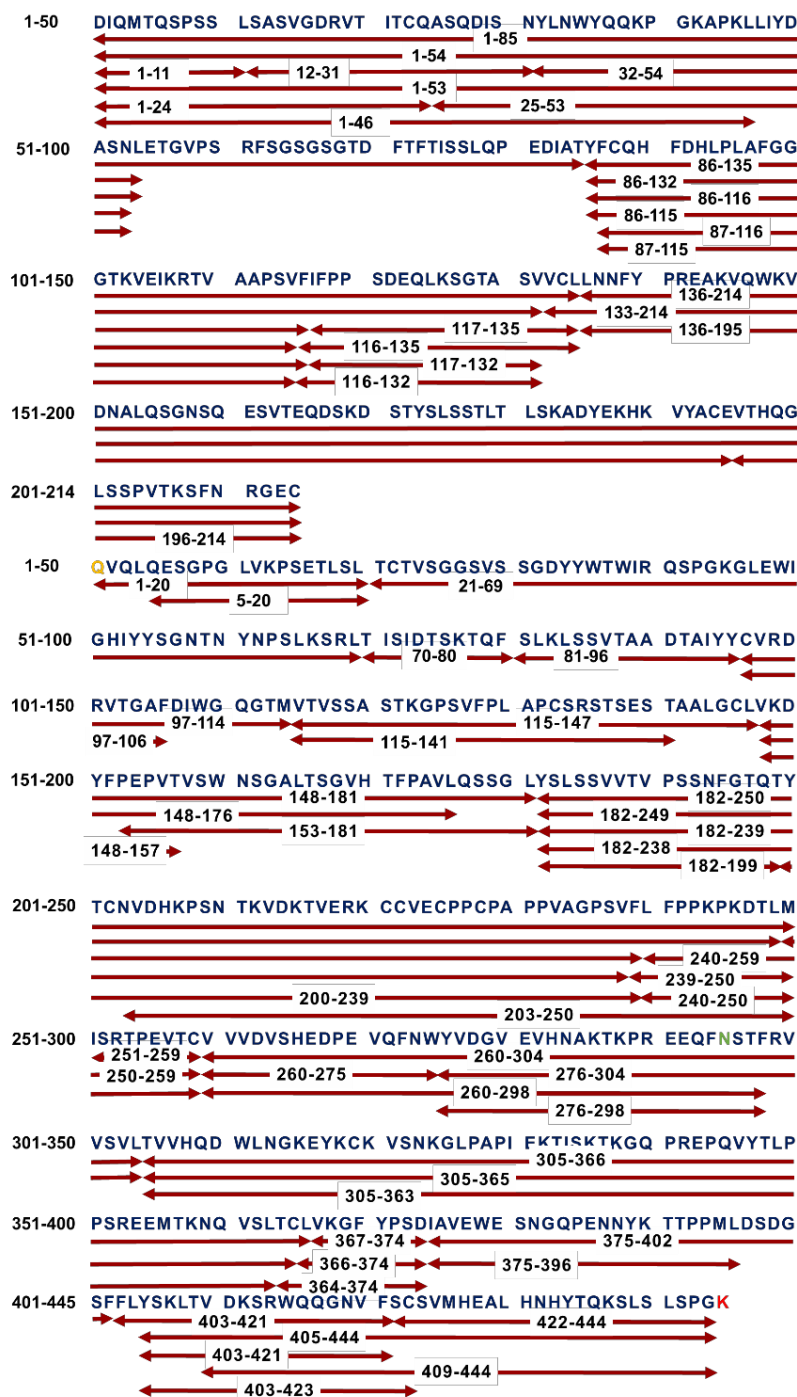

**Figure S-5.** Sequence map of the peptides identified from infusion ESI-Orbitrap analysis of an in-membrane peptic digest of Vectibix. The orange “Q” indicates N-terminal pyroglutamate formation, the light green “N” denotes the glycosylation site, and the red “K” represents the C-terminal lysine clipping.

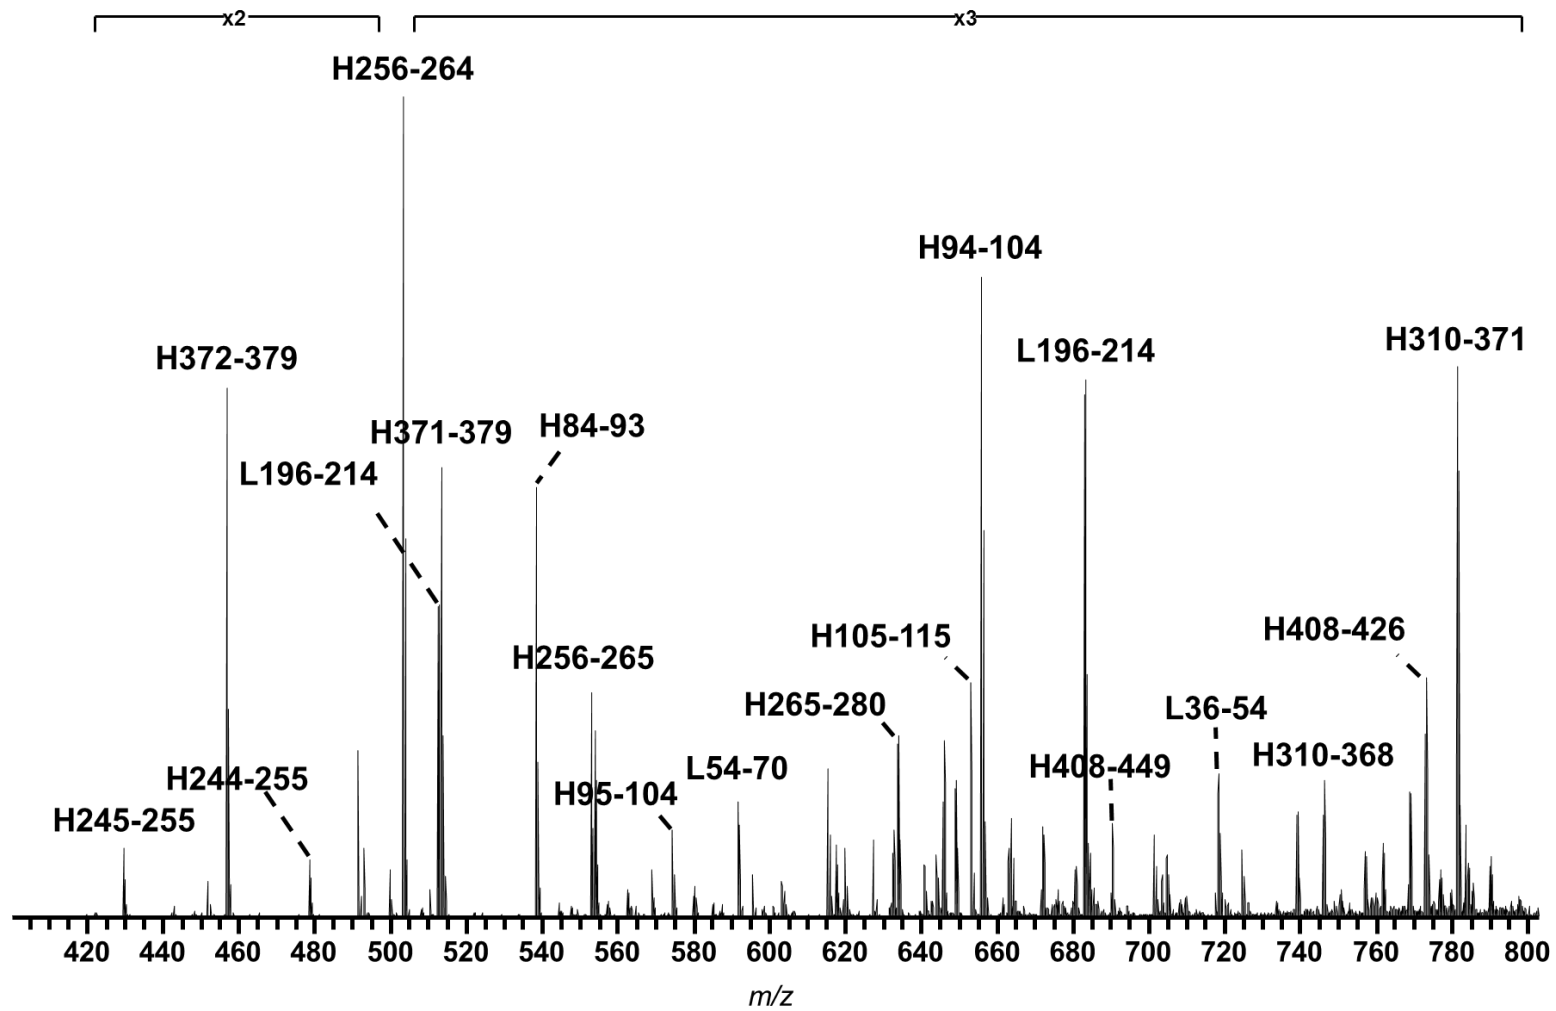

**Figure S-6.** Part of the mass spectrum of a peptic spin digest of Herceptin. Labels show the amino acids on the Hc and Lc (not all of the peptide signals are labelled).

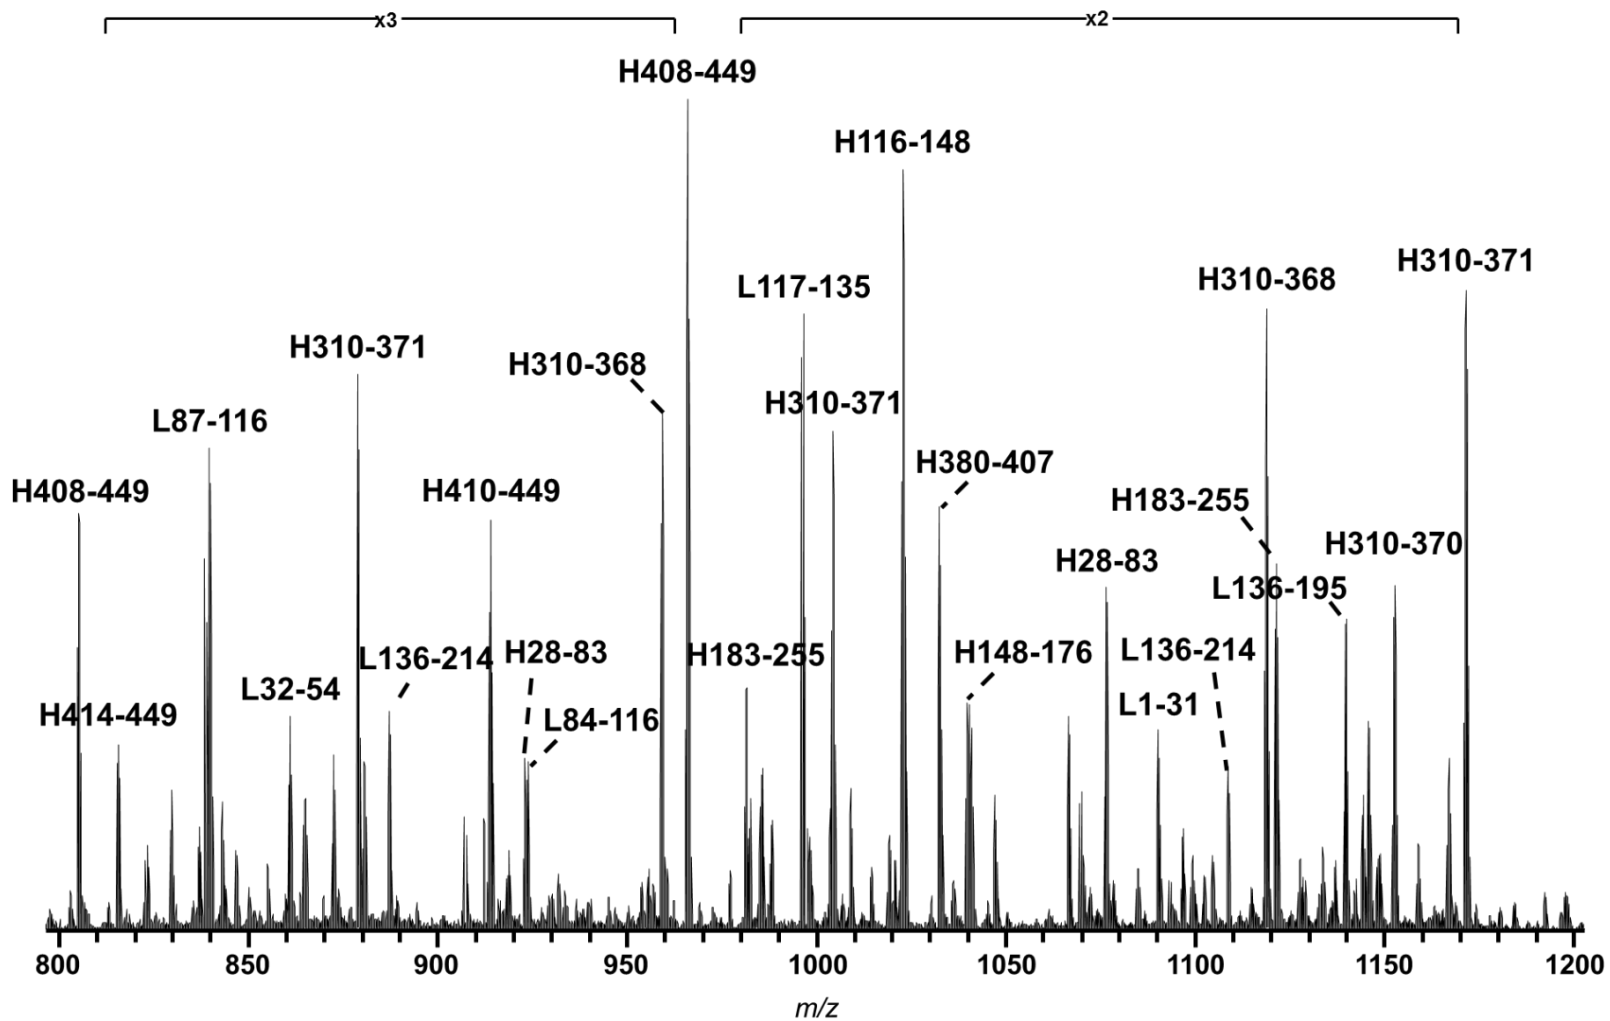

**Figure S-6** (continued). Part of the mass spectrum of a peptic spin digest of Herceptin. Labels show the amino acids on the Hc and Lc (not all of the peptide signals are labelled).

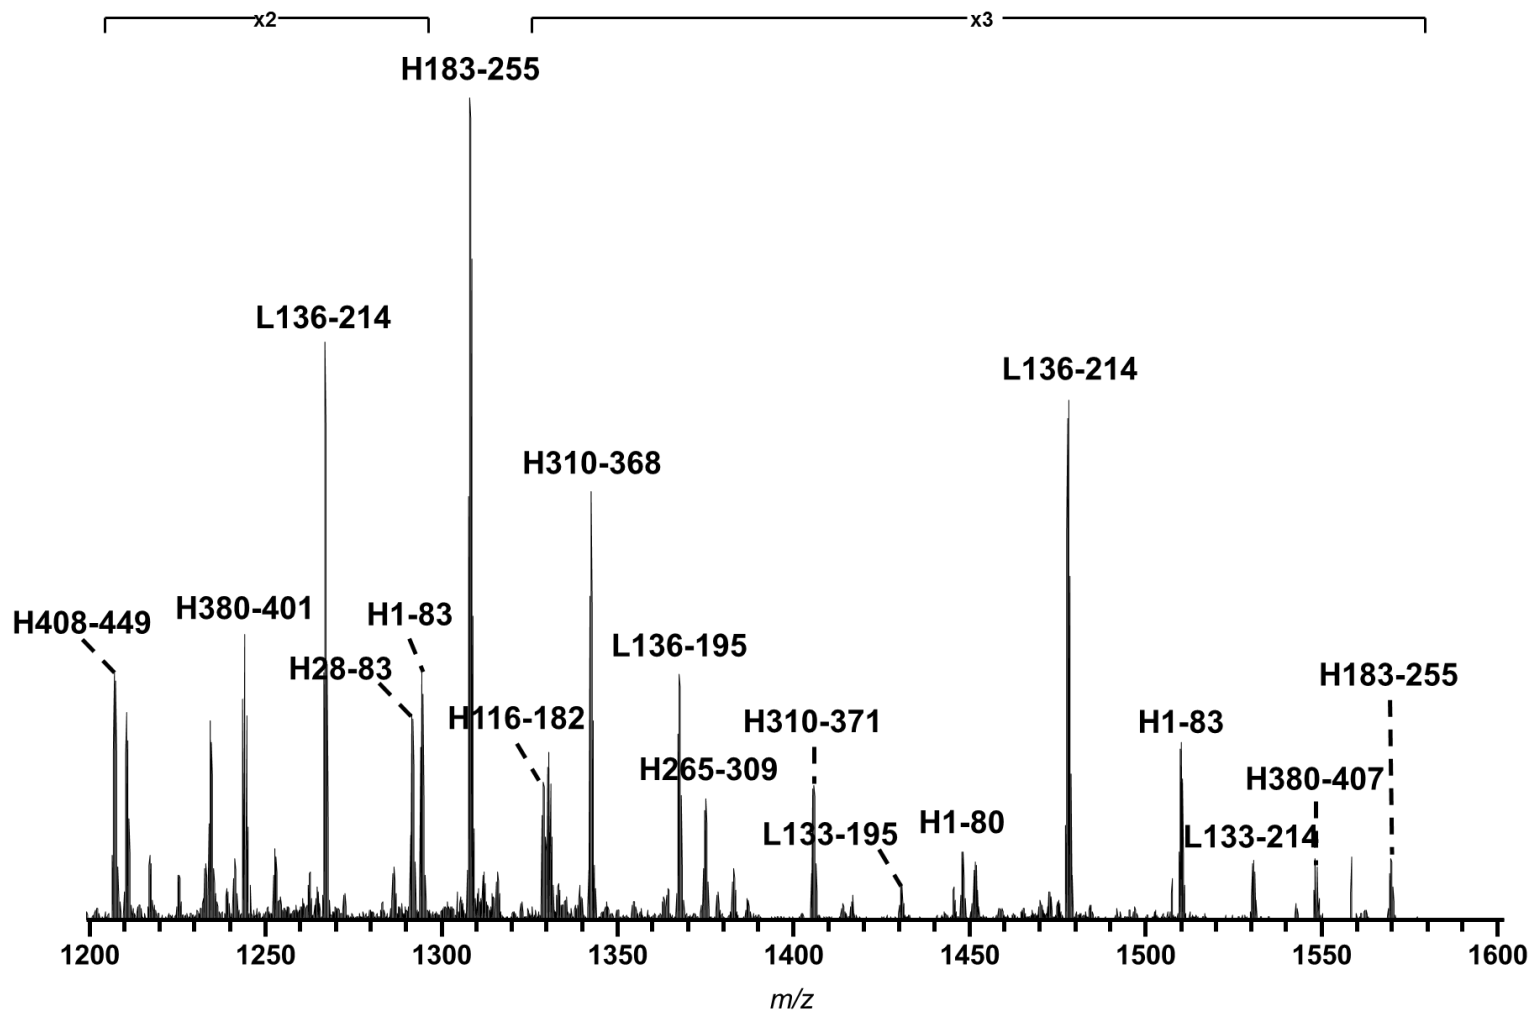

**Figure S-6** (continued). Part of the mass spectrum of a peptic spin digest of Herceptin. Labels show the amino acids on the Hc and Lc (not all of the peptide signals are labelled).

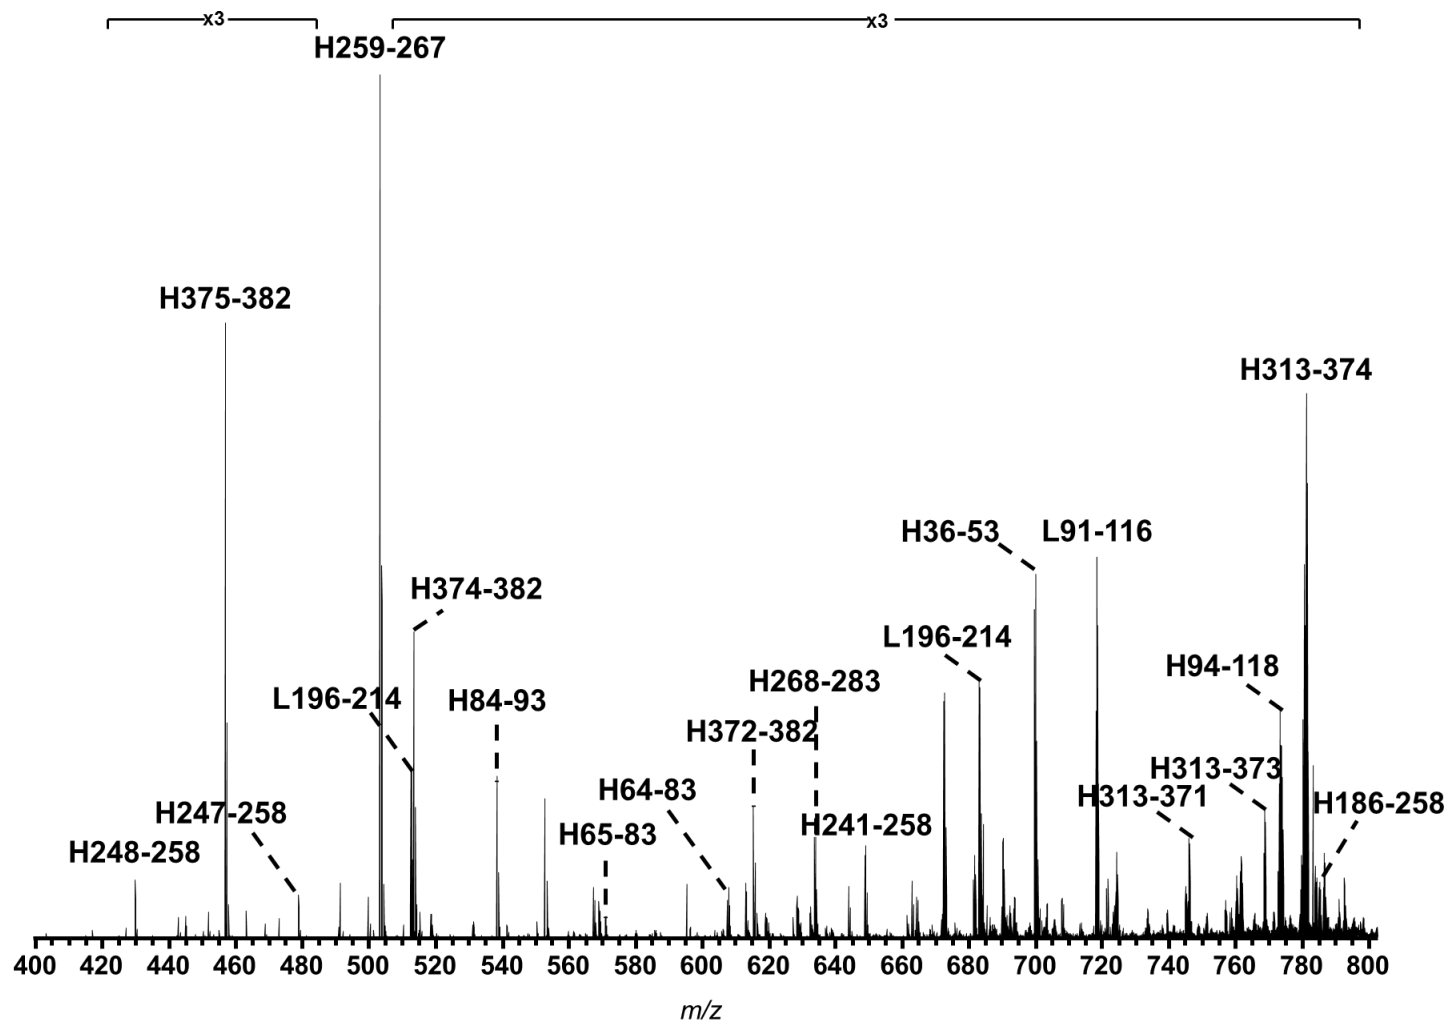

**Figure S-7.** Part of the mass spectrum of a peptic spin digest of Avastin. Labels show the amino acids on the Hc and Lc (not all of the peptide signals are labelled).

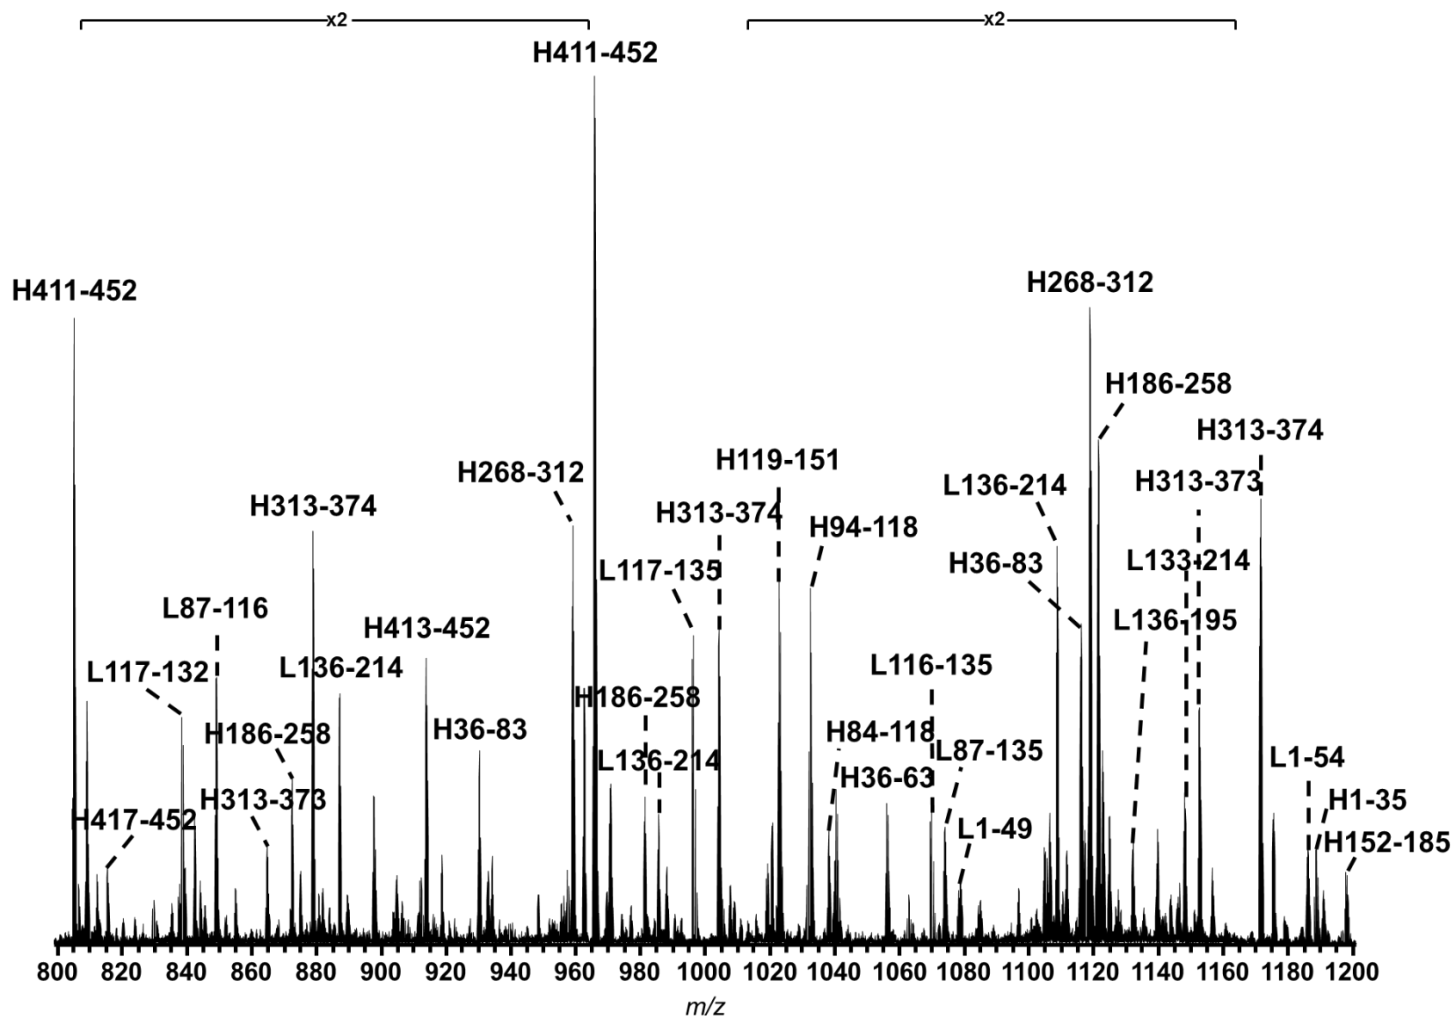

**Figure S-7** (continued). Part of the mass spectrum of a peptic spin digest of Avastin. Labels show the amino acids on the Hc and Lc (not all of the peptide signals are labelled).

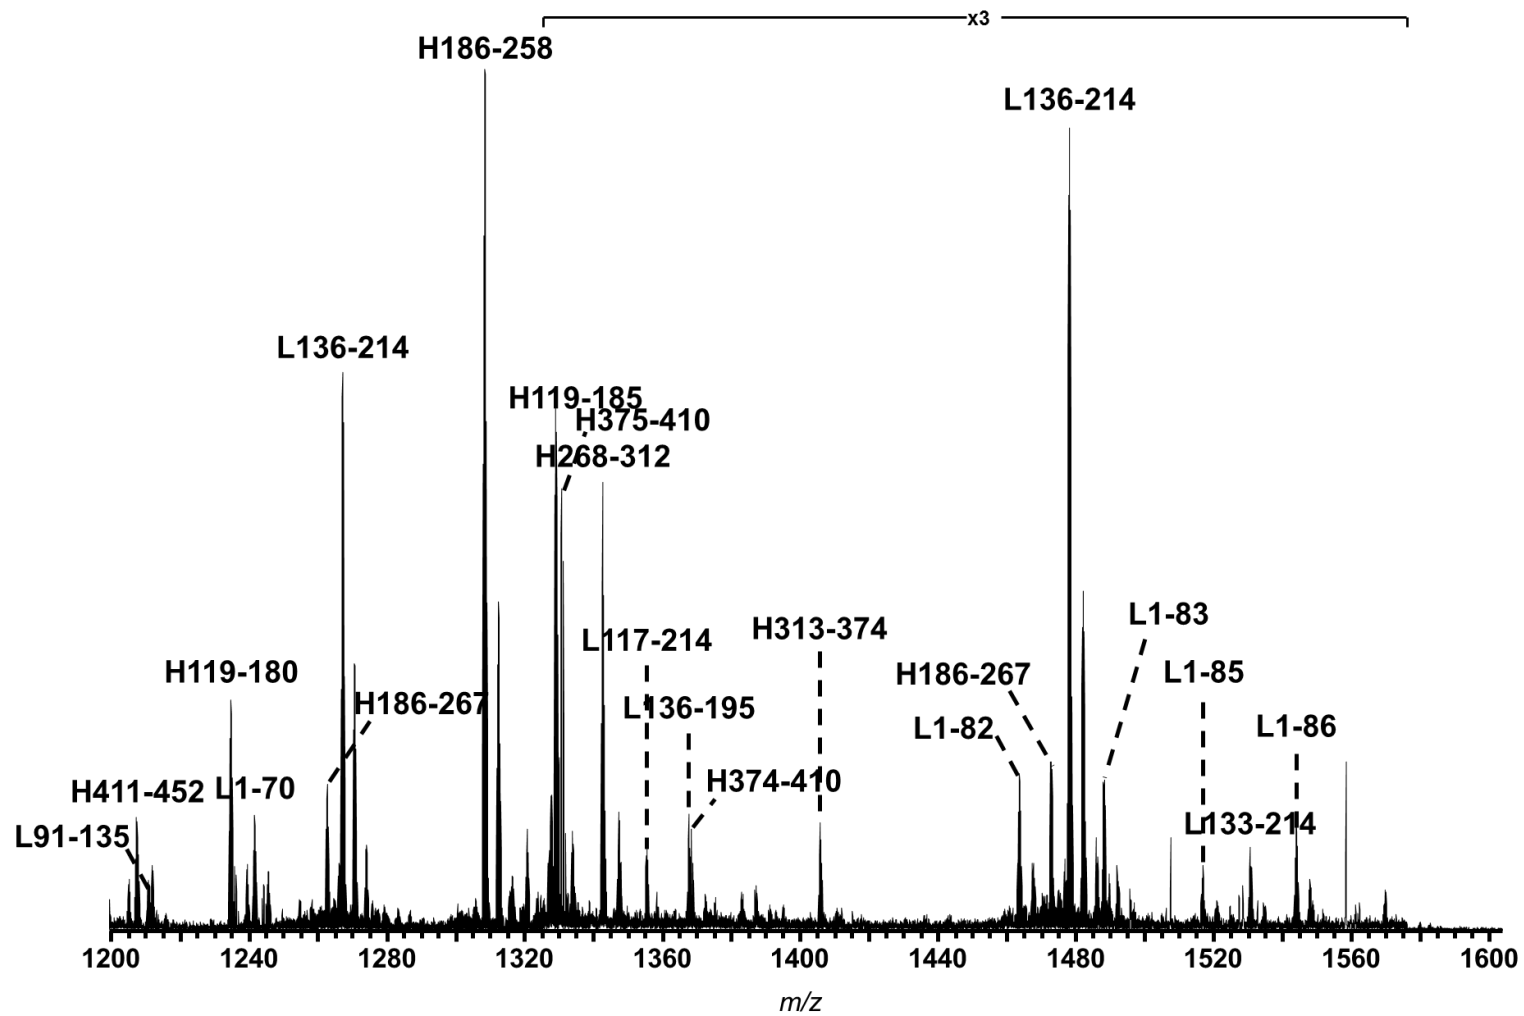

**Figure S-7** (continued). Part of the mass spectrum of a peptic spin digest of Avastin. Labels show the amino acids on the Hc and Lc (not all of the peptide signals are labelled).

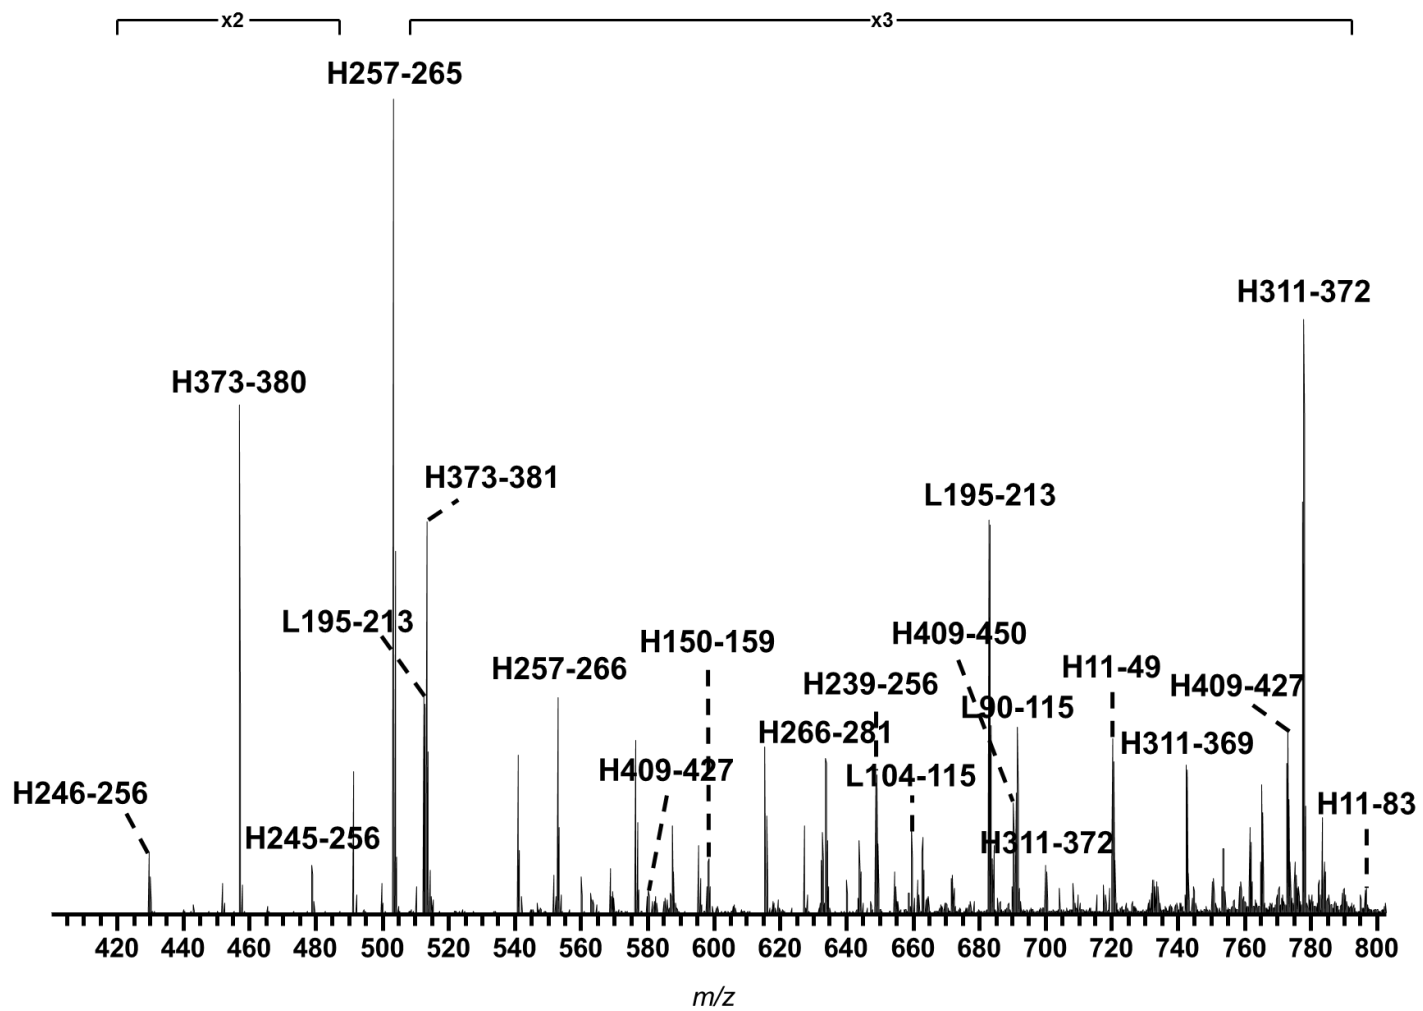

**Figure S-8.** Part of the mass spectrum of a peptic spin digest of Rituxan. Labels show the amino acids on the Hc and Lc (not all of the peptide signals are labelled).



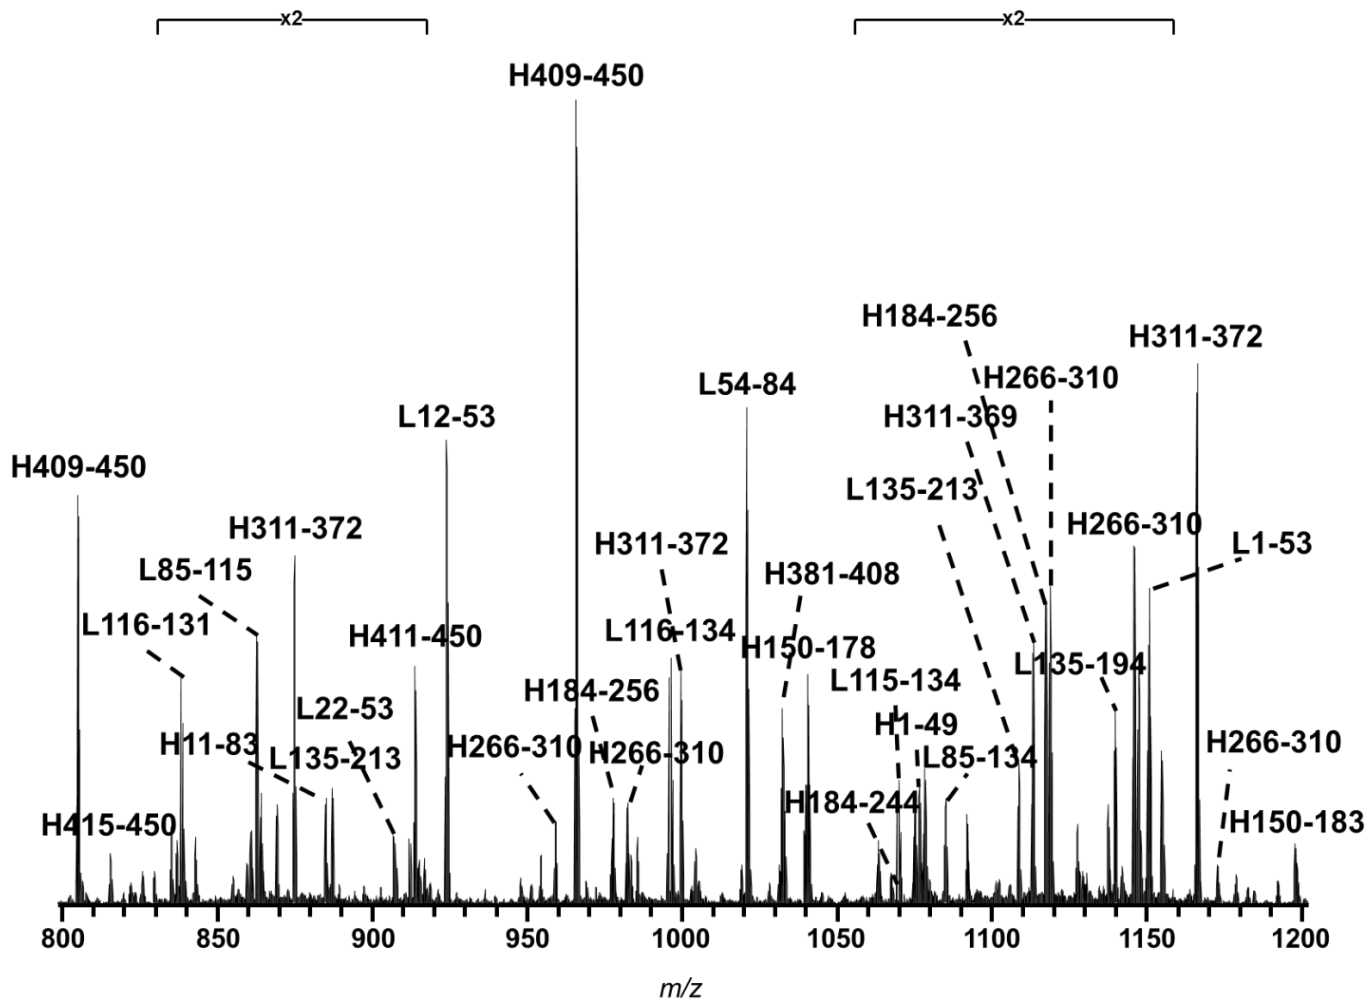

**Figure S-8** (continued). Part of the mass spectrum of a peptic spin digest of Rituxan. Labels show the amino acids on the Hc and Lc (not all of the peptide signals are labelled).

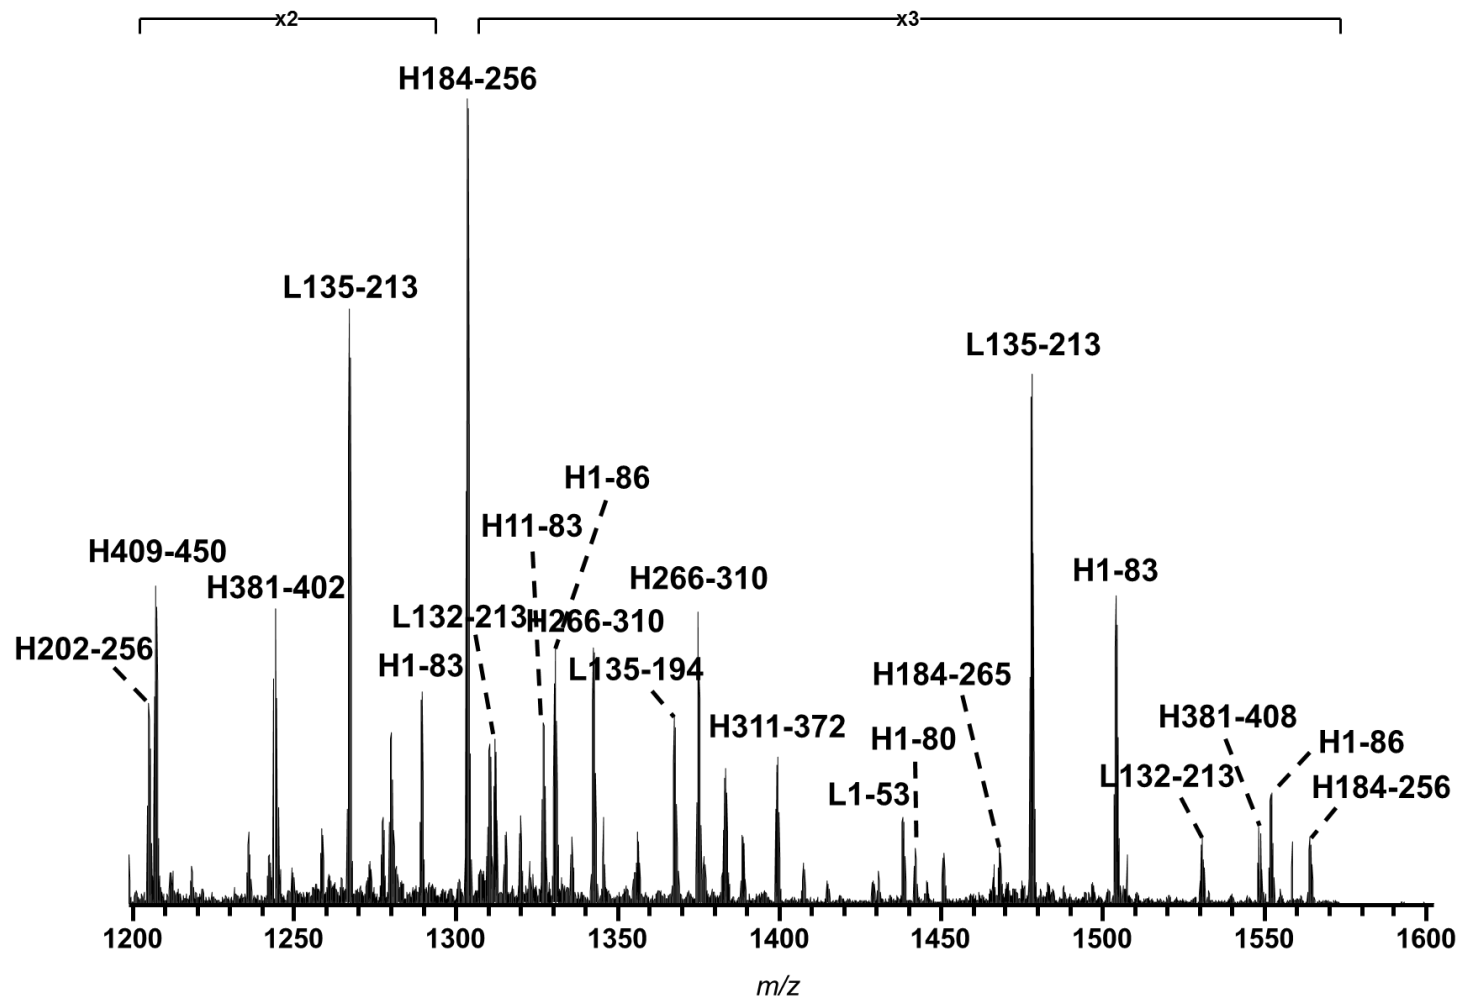

**Figure S-8** (continued). Part of the mass spectrum of a peptic spin digest of Rituxan. Labels show the amino acids on the Hc and Lc (not all of the peptide signals are labelled).

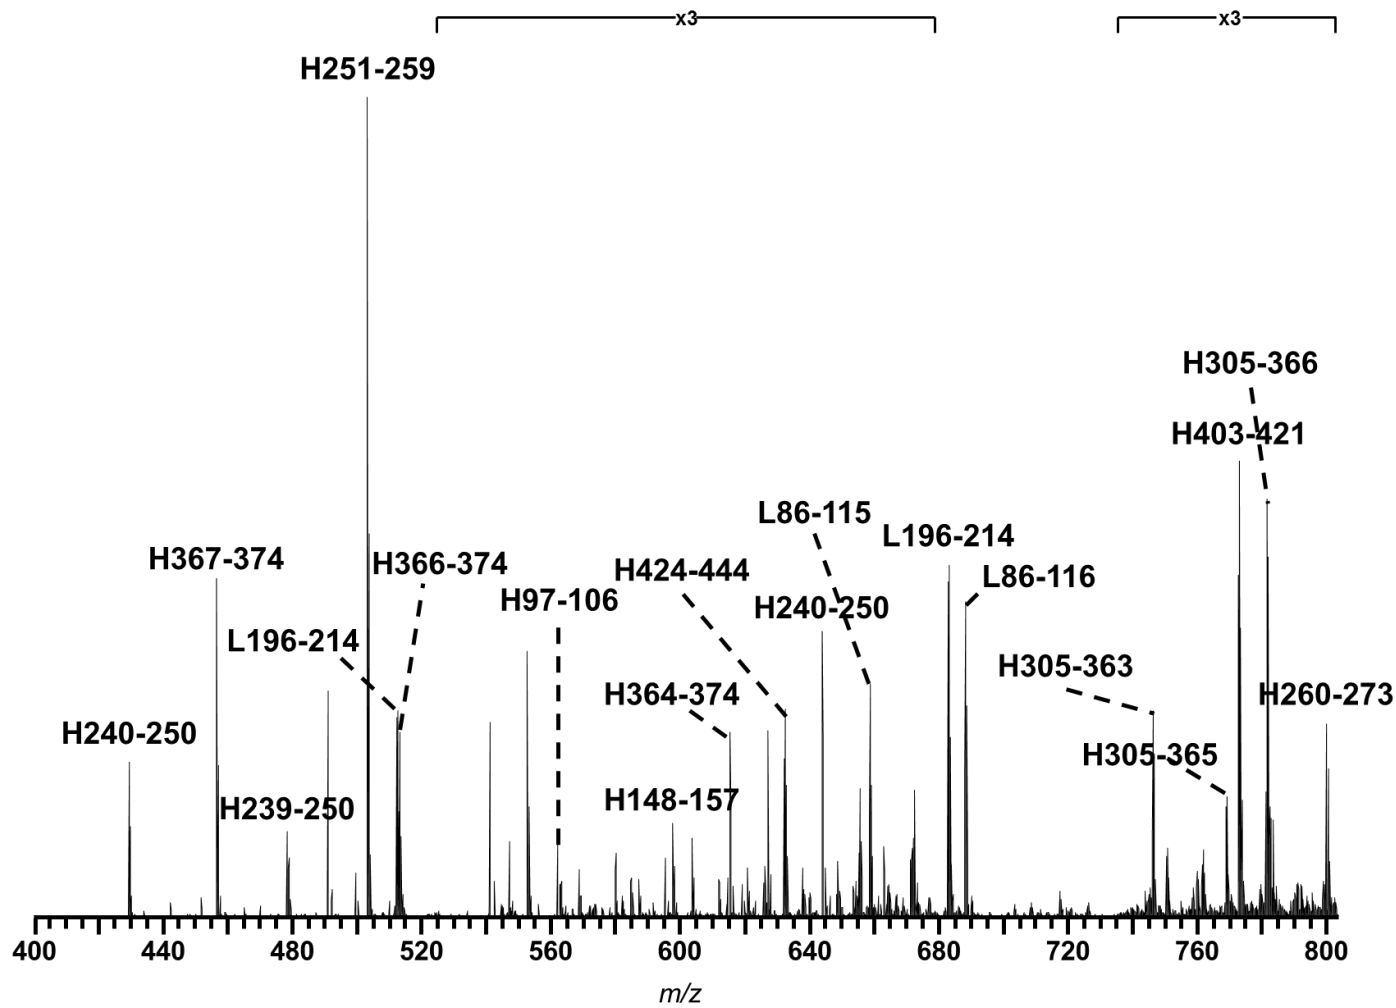

**Figure S-9.** Part of the mass spectrum of a peptic spin digest of Vectibix. Labels show the amino acids on the Hc and Lc (not all of the peptide signals are labelled).

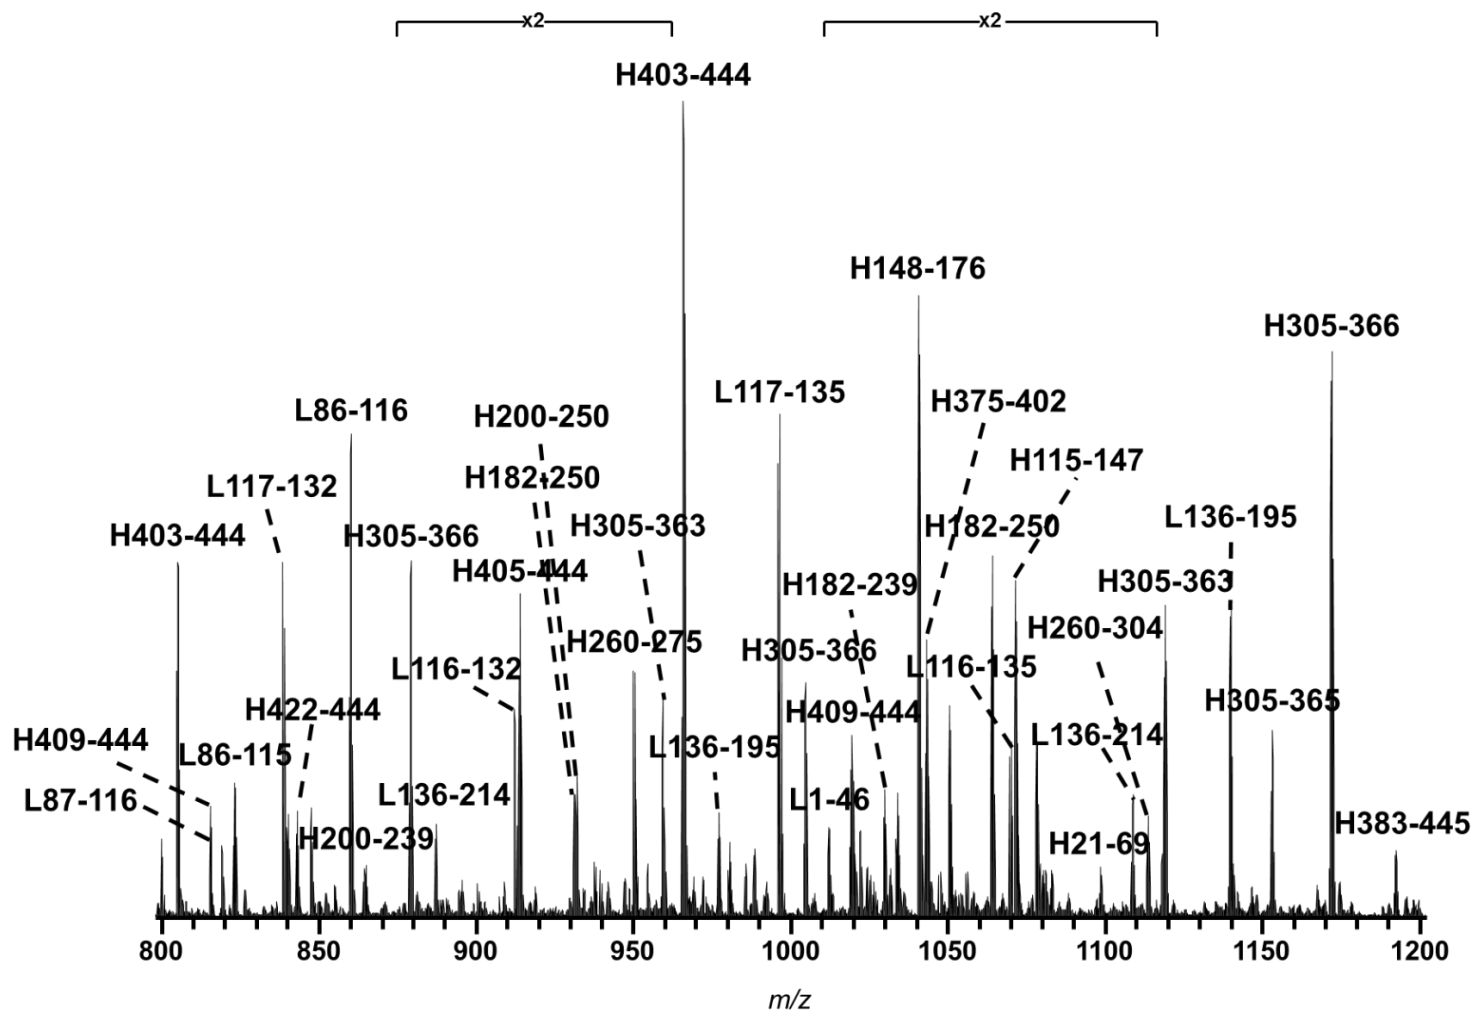

**Figure S-9** (continued). Part of the mass spectrum of a peptic spin digest of Vectibix. Labels show the amino acids on the Hc and Lc (not all of the peptide signals are labelled).

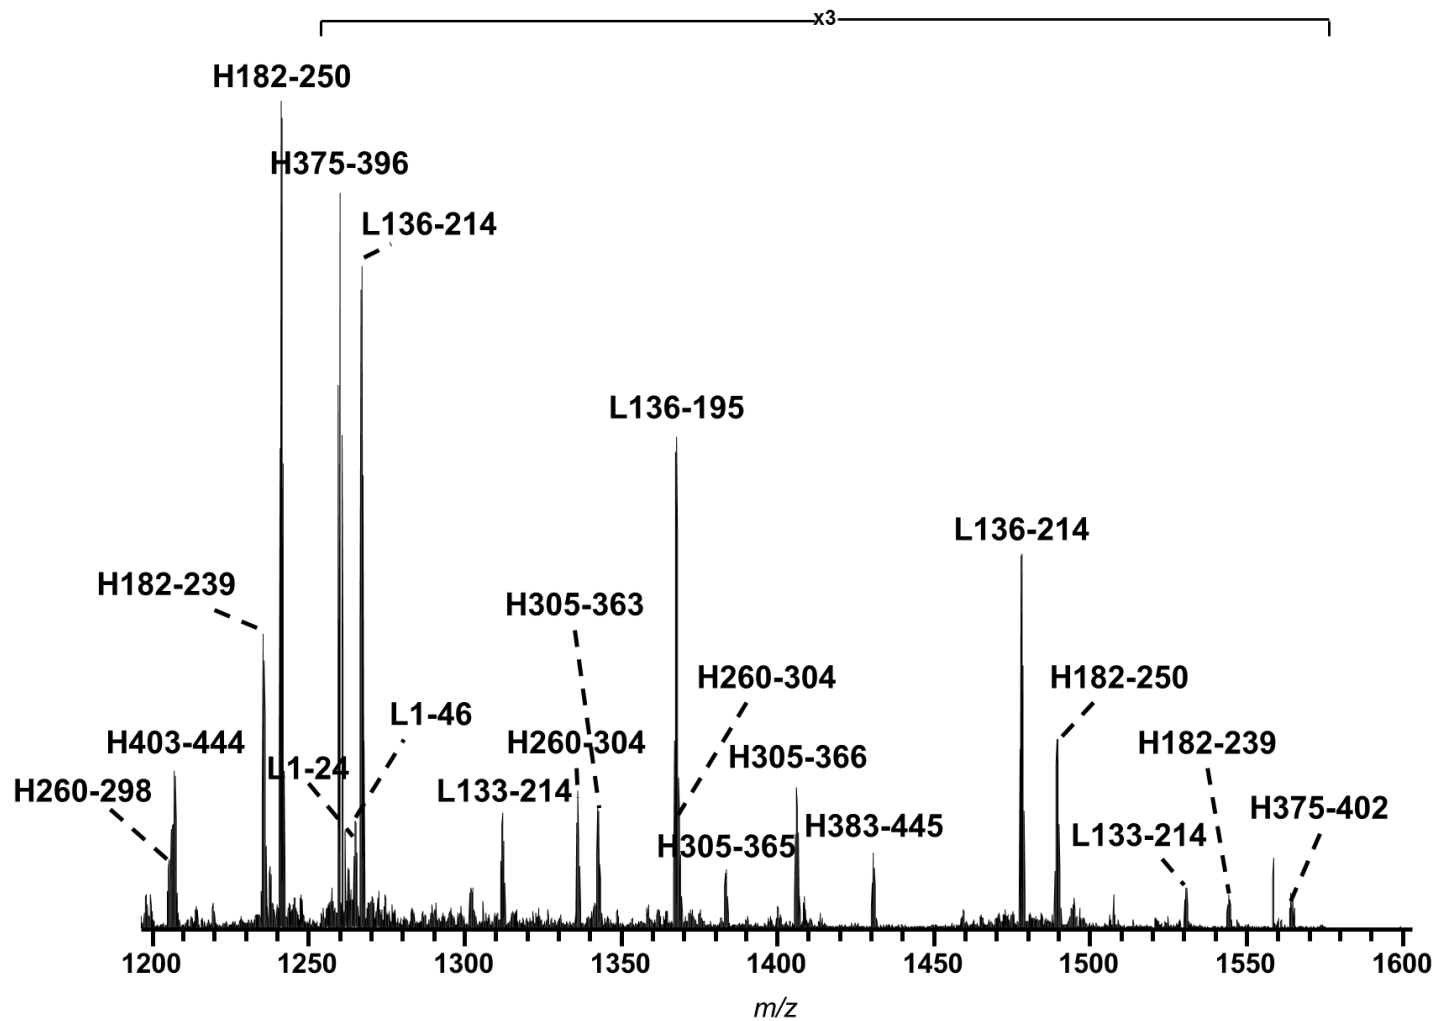

**Figure S-9** (continued). Part of the mass spectrum of a peptic spin digest of Vectibix. Labels show the amino acids on the Hc and Lc (not all of the peptide signals are labelled).

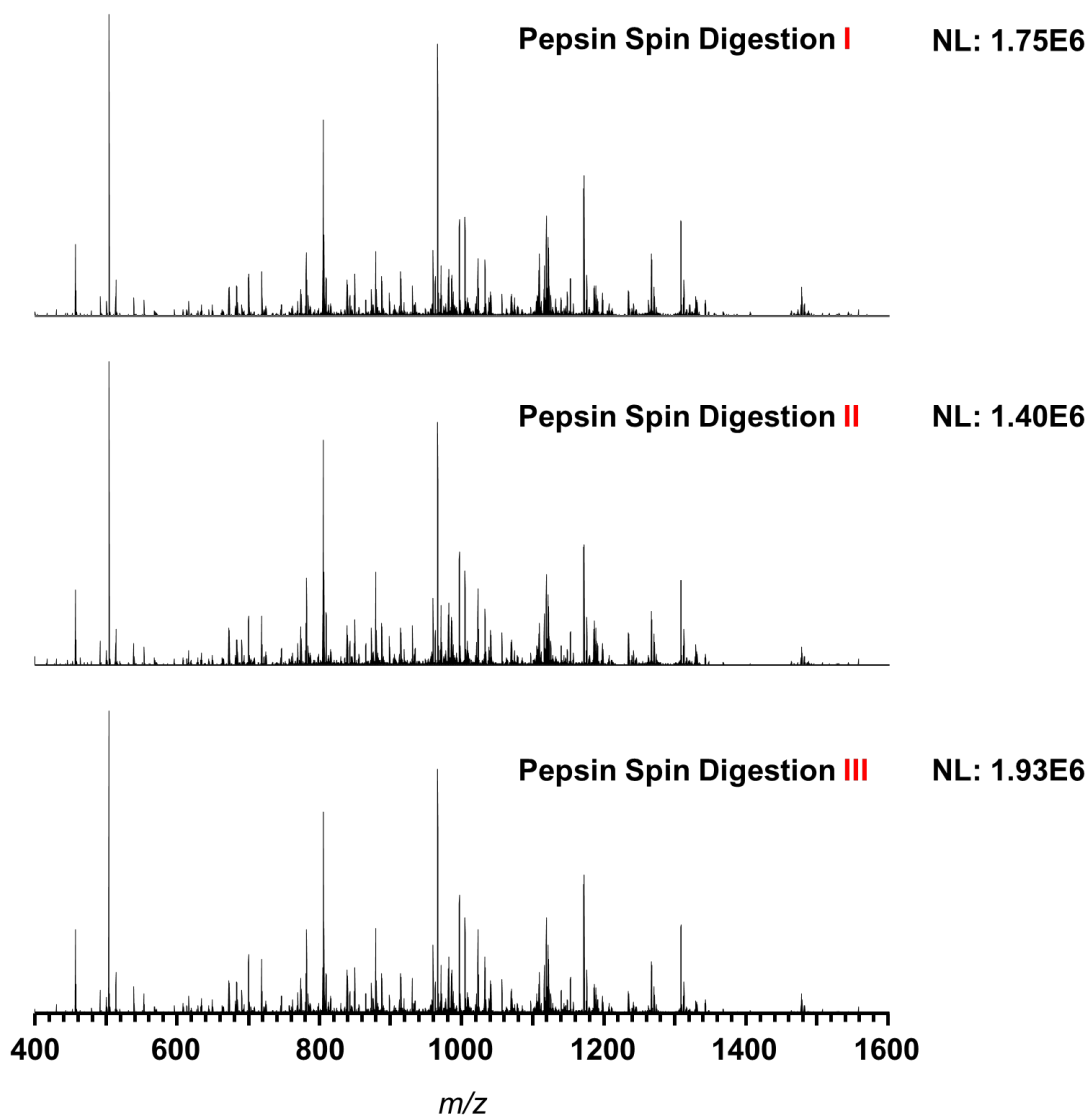

**Figure S-10.** Mass spectra of 3 different spin-membrane digests of Avastin. Each digestion employed a different peptic spin membrane. For the twenty highest signals in the mass spectra, standard deviations of the signals (relative to the base peak) from triplicate digestion are <6%.

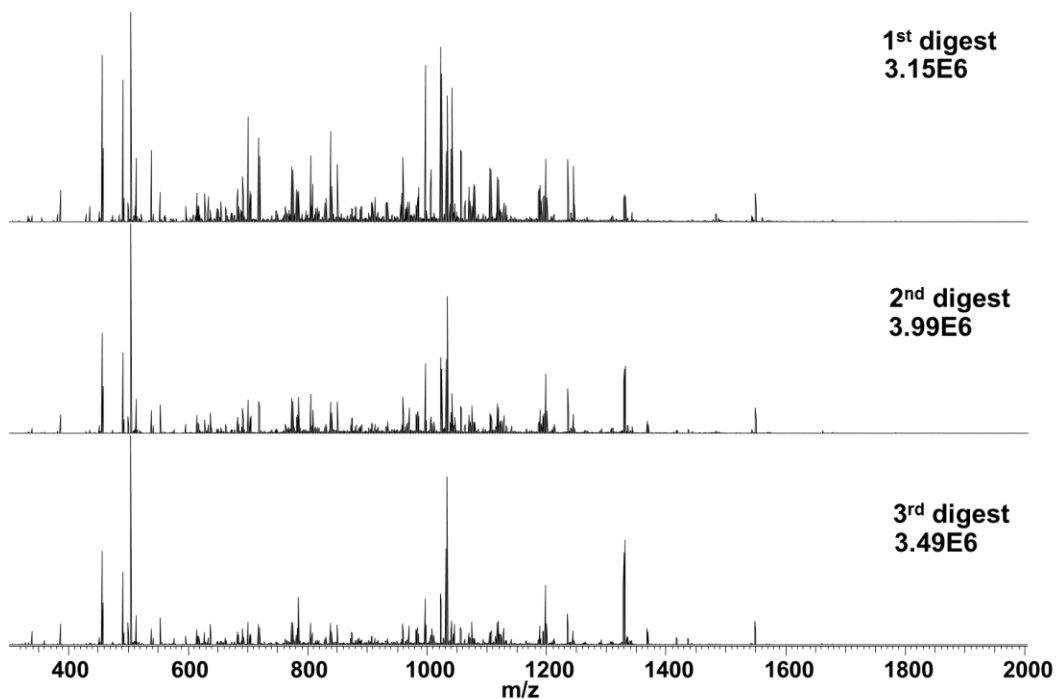

**Figure S-11.** Infusion-MS spectra from three consecutive Av peptic spin digests obtained using the same spin membrane.

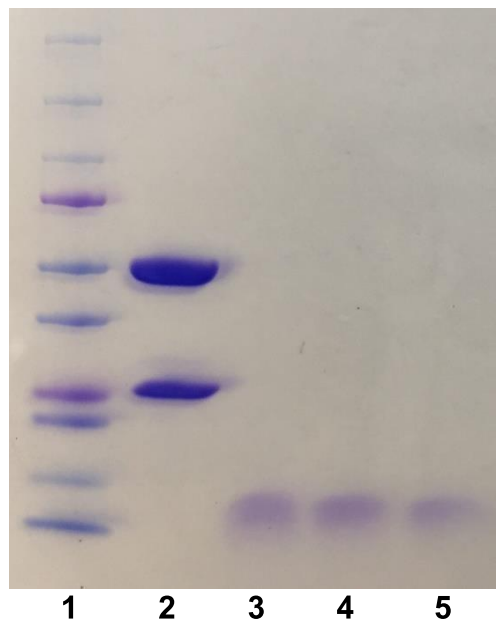

**Figure S-12.** Gel electrophoresis (SDS-PAGE) analysis of the reusability of a pepsin spin membrane. Lane 1: protein standards; Lane 2: 5  $\mu$ g of Avastin; Lanes 3, 4 and 5: 5  $\mu$ g of Avastin peptic spin digests (spun at 500 g) obtained sequentially using the same membrane.

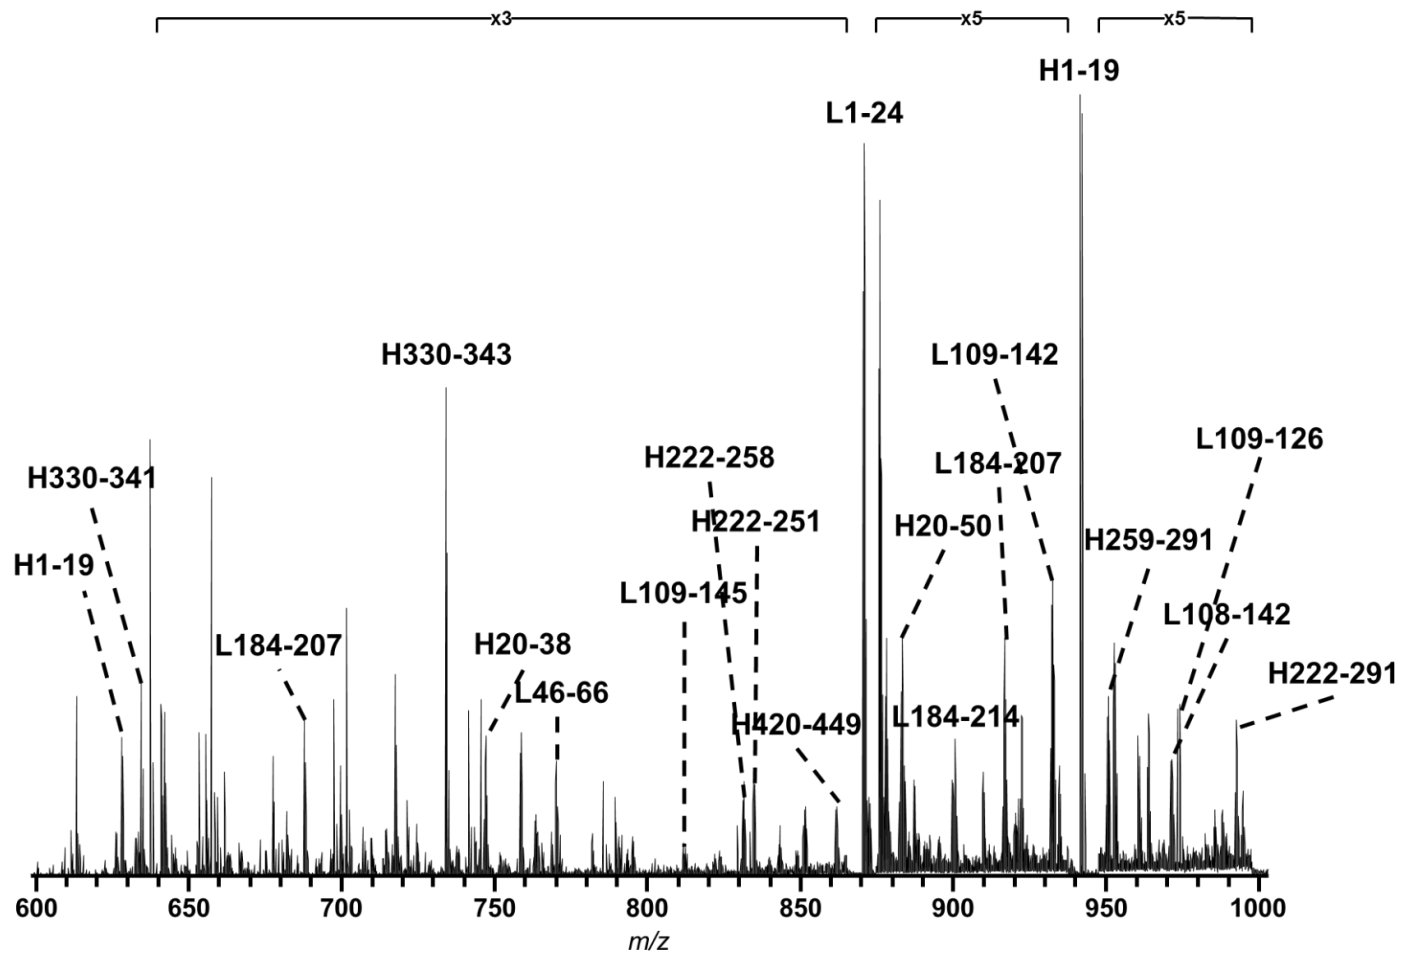

**Figure S-13.** Part of the mass spectrum of a tryptic spin digest of Herceptin. Labels show the amino acids on the Hc and Lc (not all of the peptide signals are labelled).



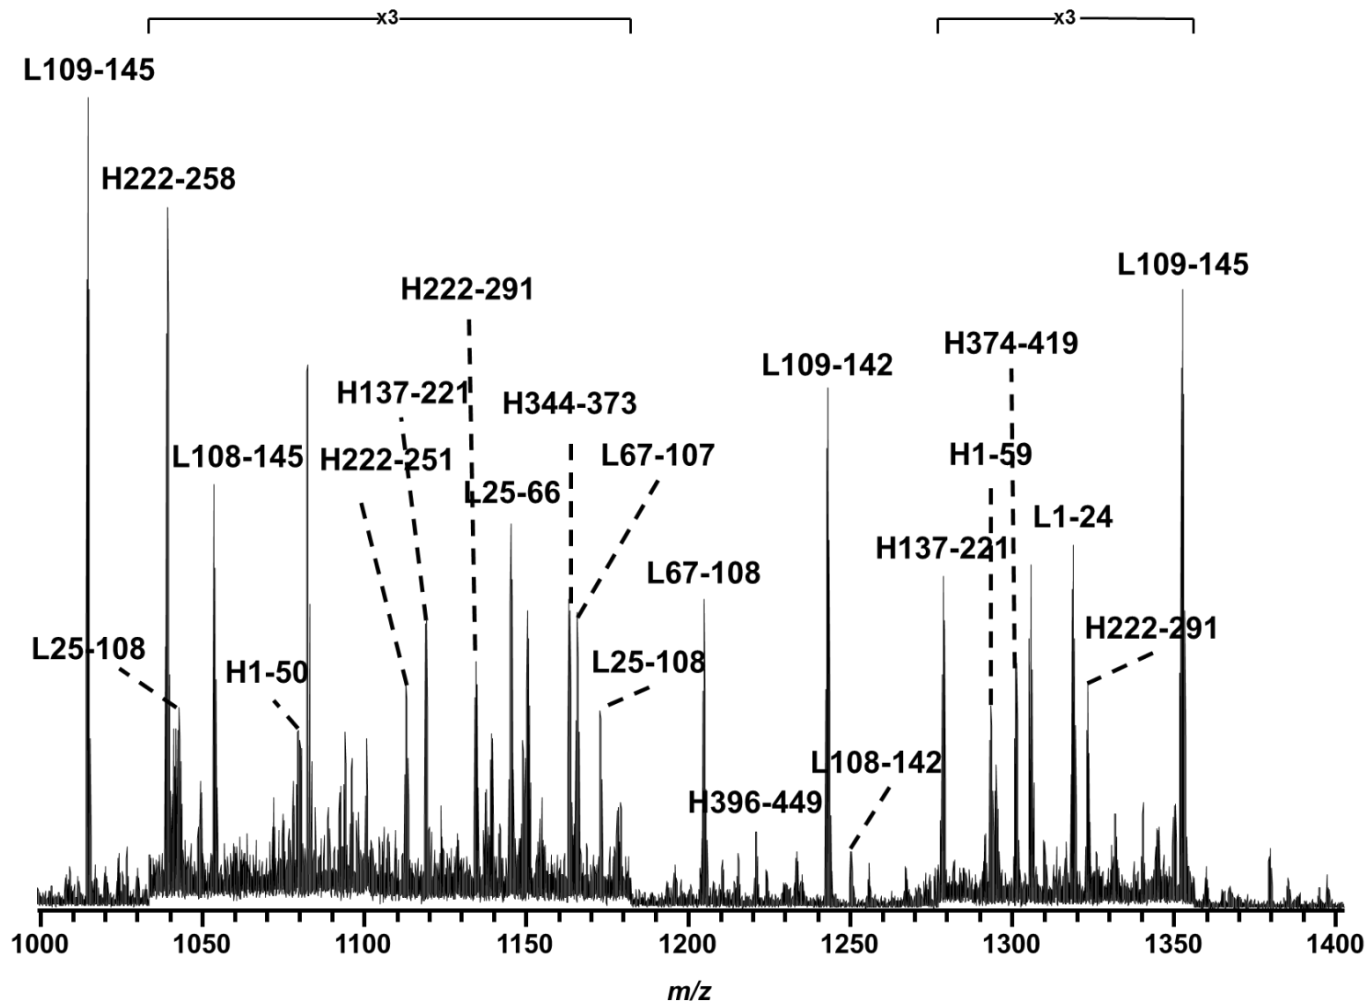

**Figure S-13** (continued). Part of the mass spectrum of a tryptic spin digest of Herceptin. Labels show the amino acids on the Hc and Lc (not all of the peptide signals are labelled).

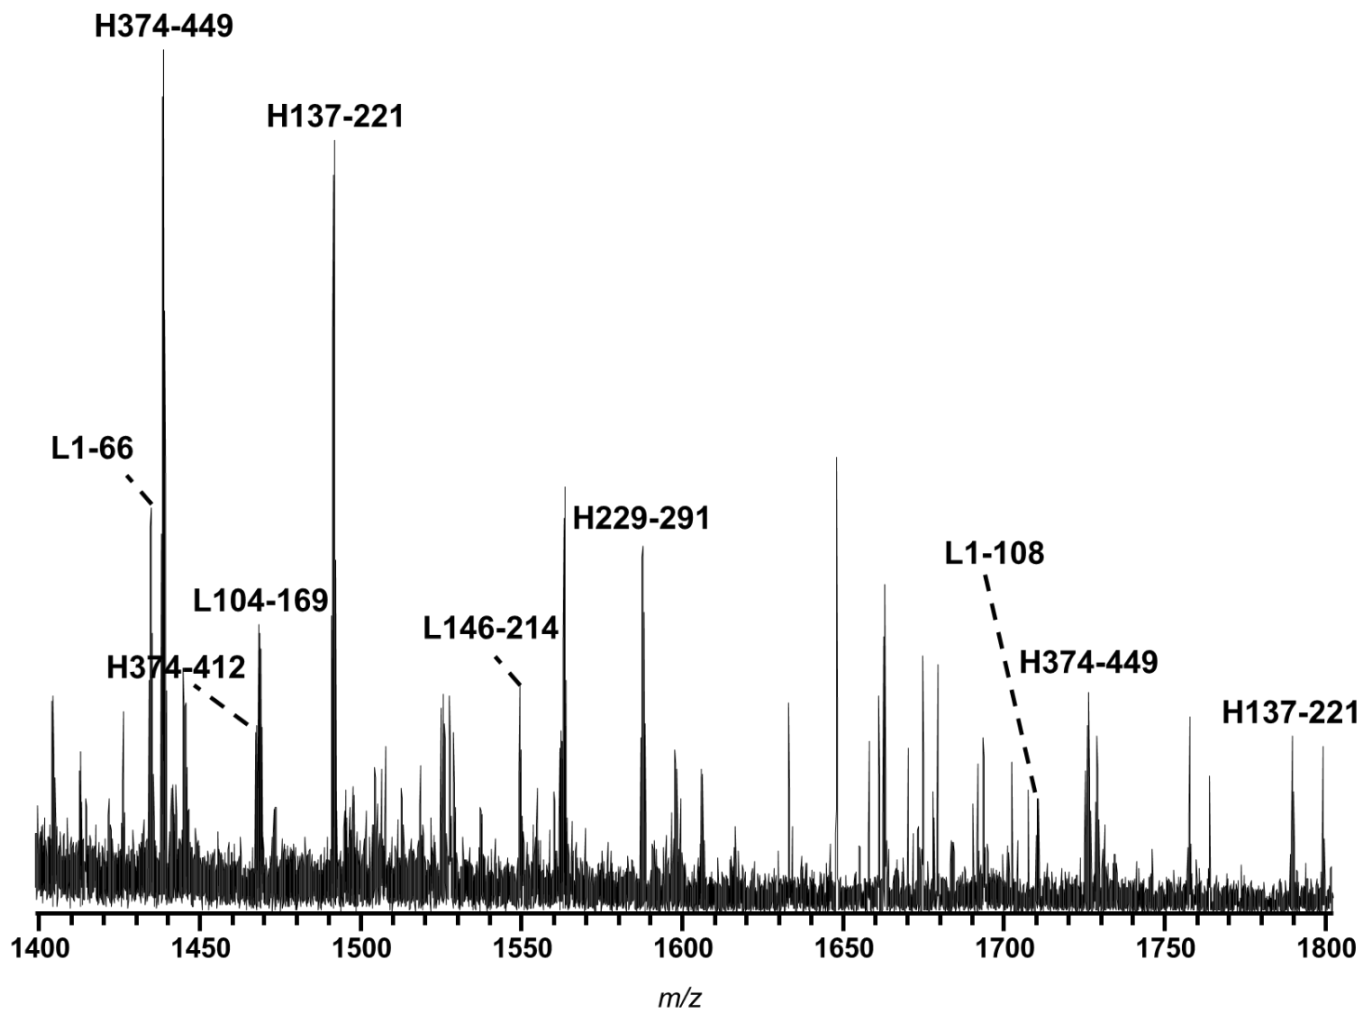

**Figure S-13** (continued). Part of the mass spectrum of a tryptic spin digest of Herceptin. Labels show the amino acids on the Hc and Lc (not all of the peptide signals are labelled).

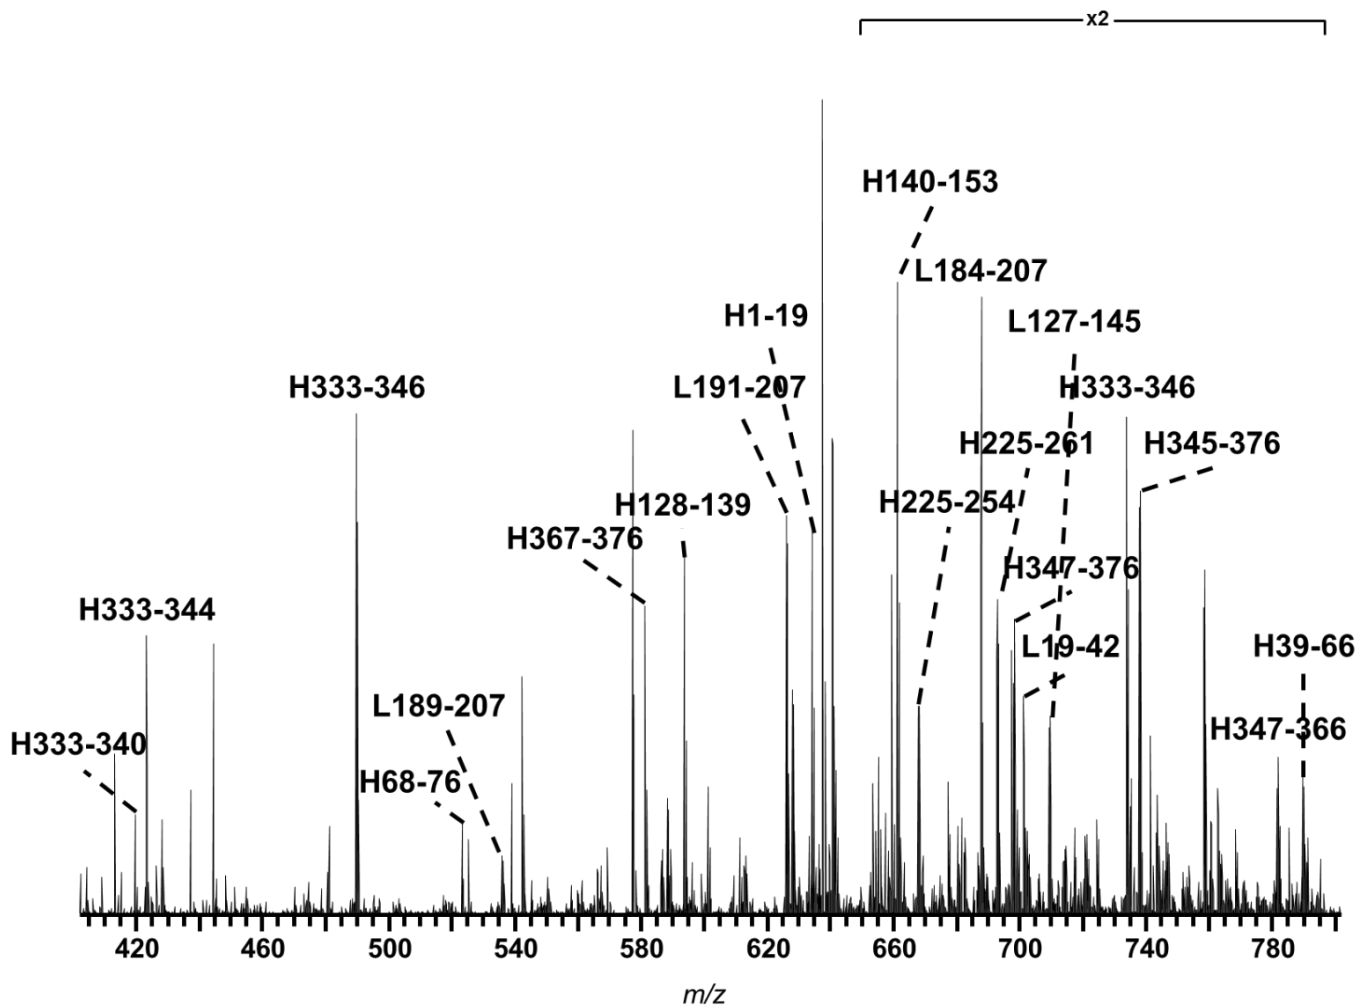

**Figure S-14.** Part of the mass spectrum of a tryptic spin digest of Avastin. Labels show the amino acids on the Hc and Lc (not all of the peptide signals are labelled).

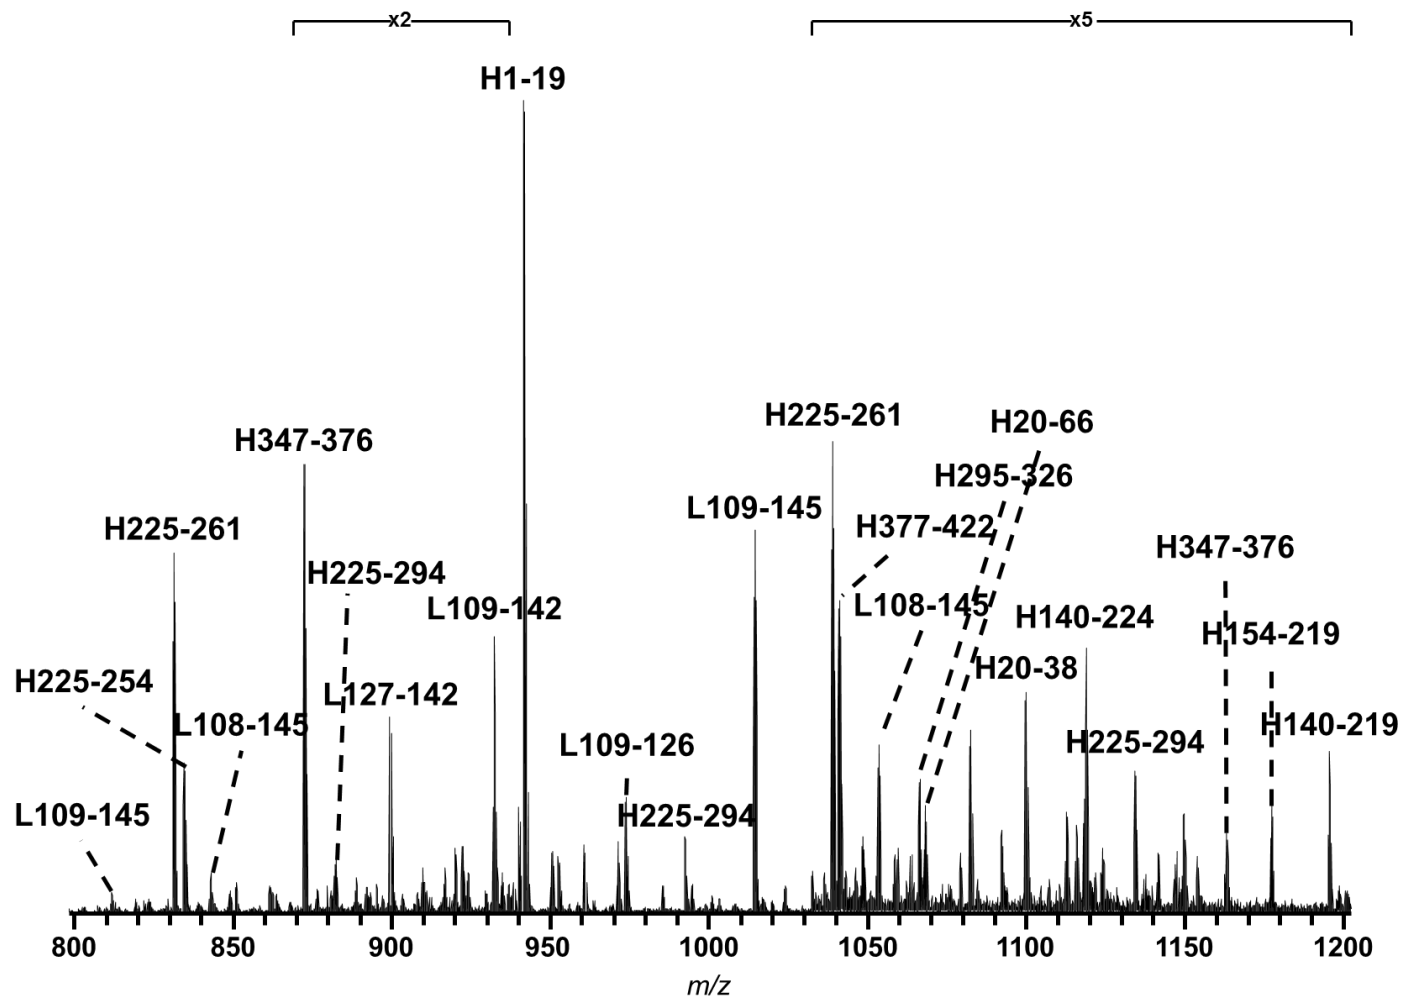

**Figure S-14** (continued). Part of the mass spectrum of a tryptic spin digest of Avastin. Labels show the amino acids on the Hc and Lc (not all of the peptide signals are labelled).

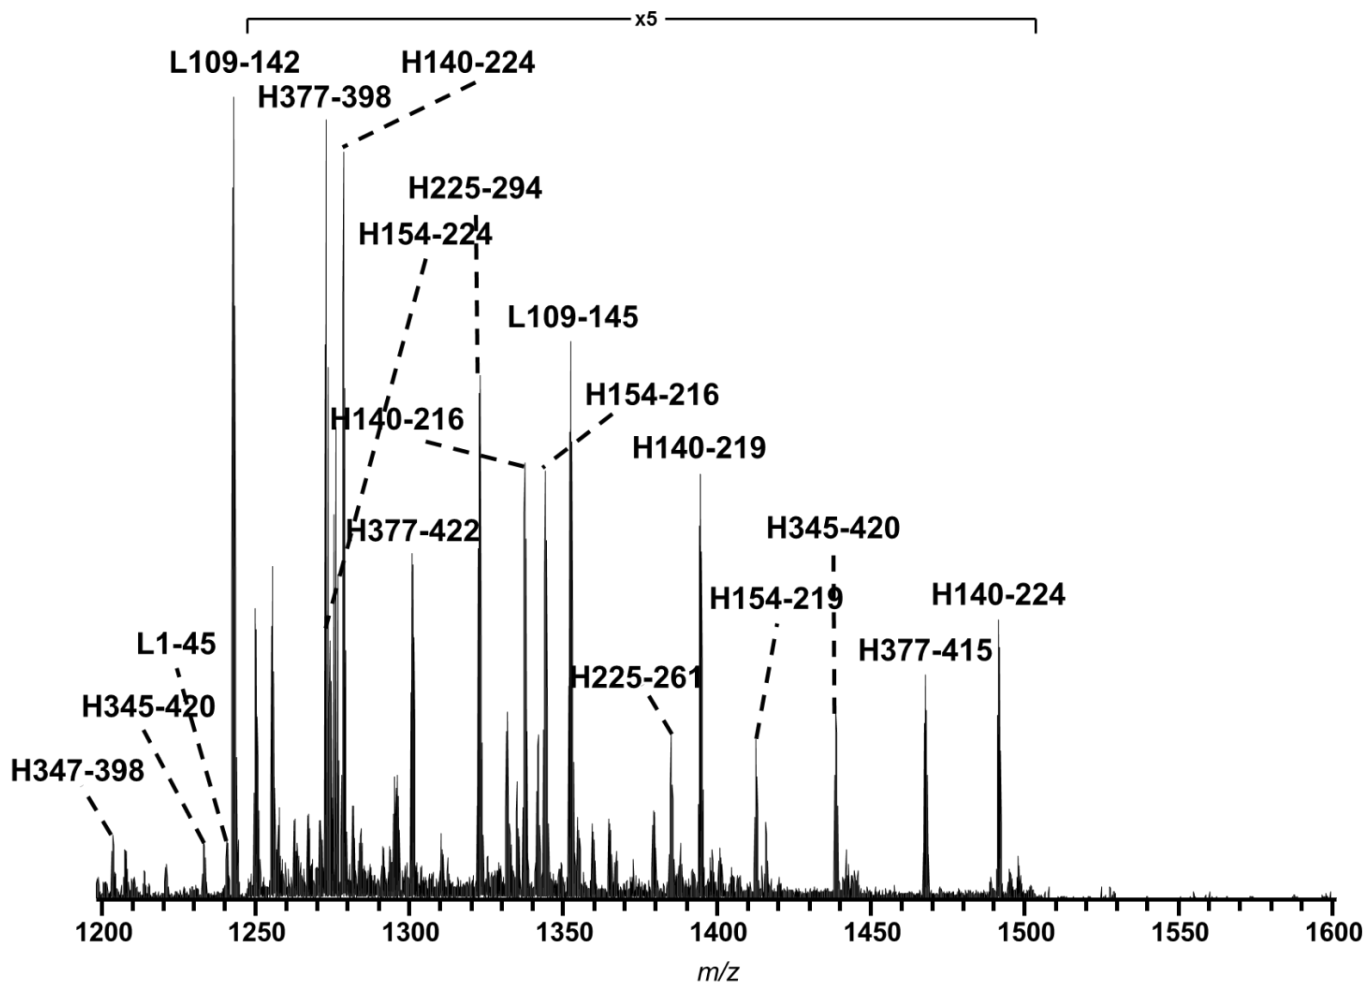

**Figure S-14** (continued). Part of the mass spectrum of a tryptic spin digest of Avastin. Labels show the amino acids on the Hc and Lc (not all of the peptide signals are labelled).

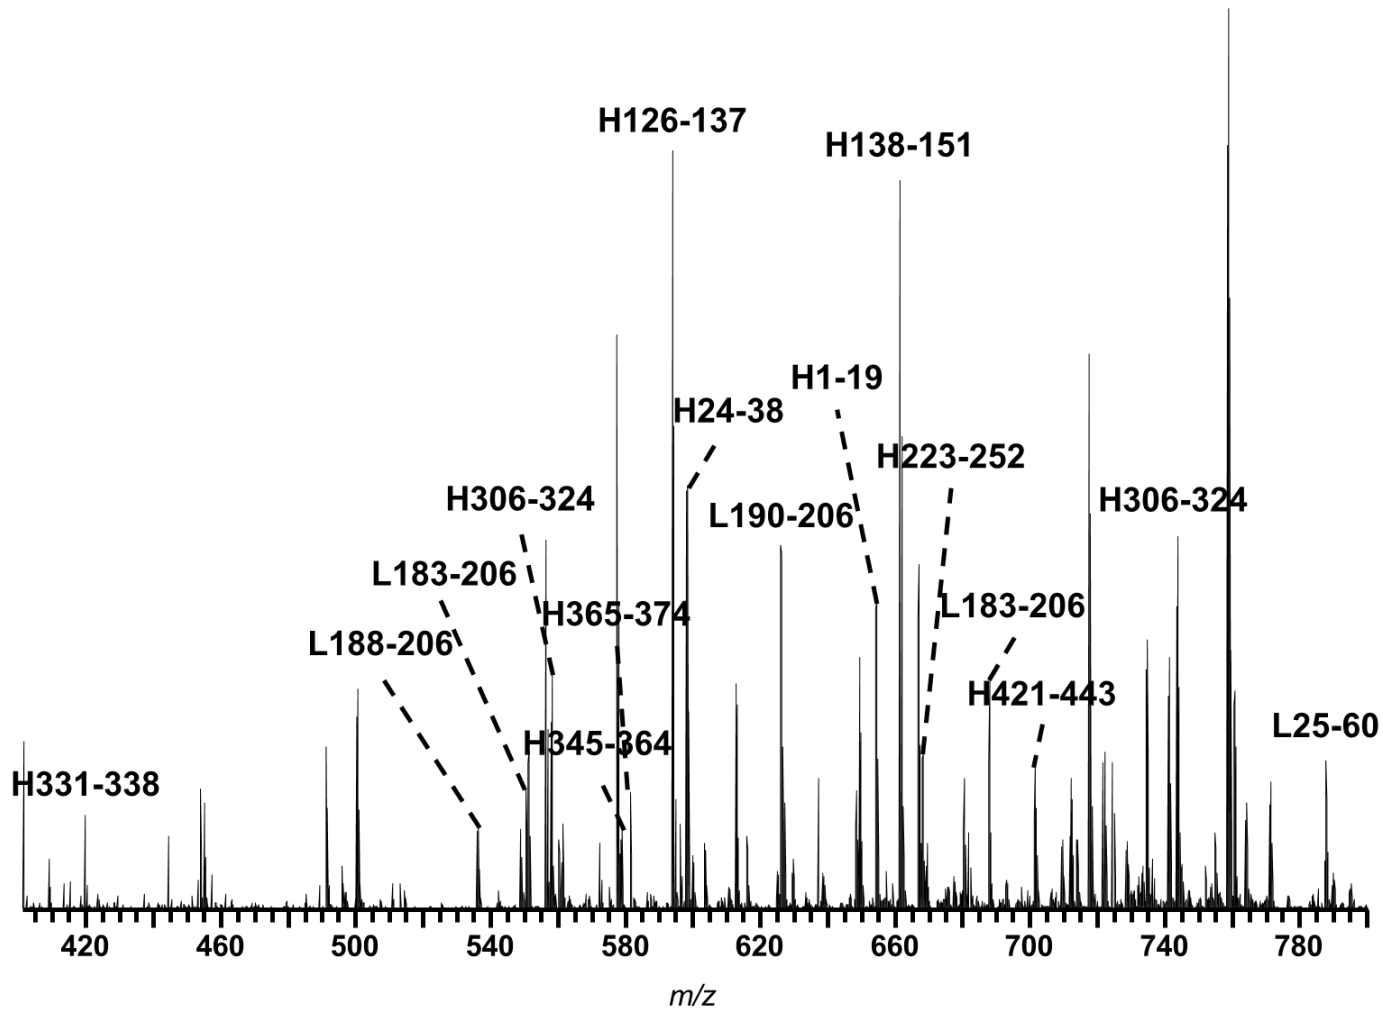

**Figure S-15.** Part of the mass spectrum of a tryptic spin digest of Rituxan. Labels show the amino acids on the Hc and Lc (not all of the peptide signals are labelled).

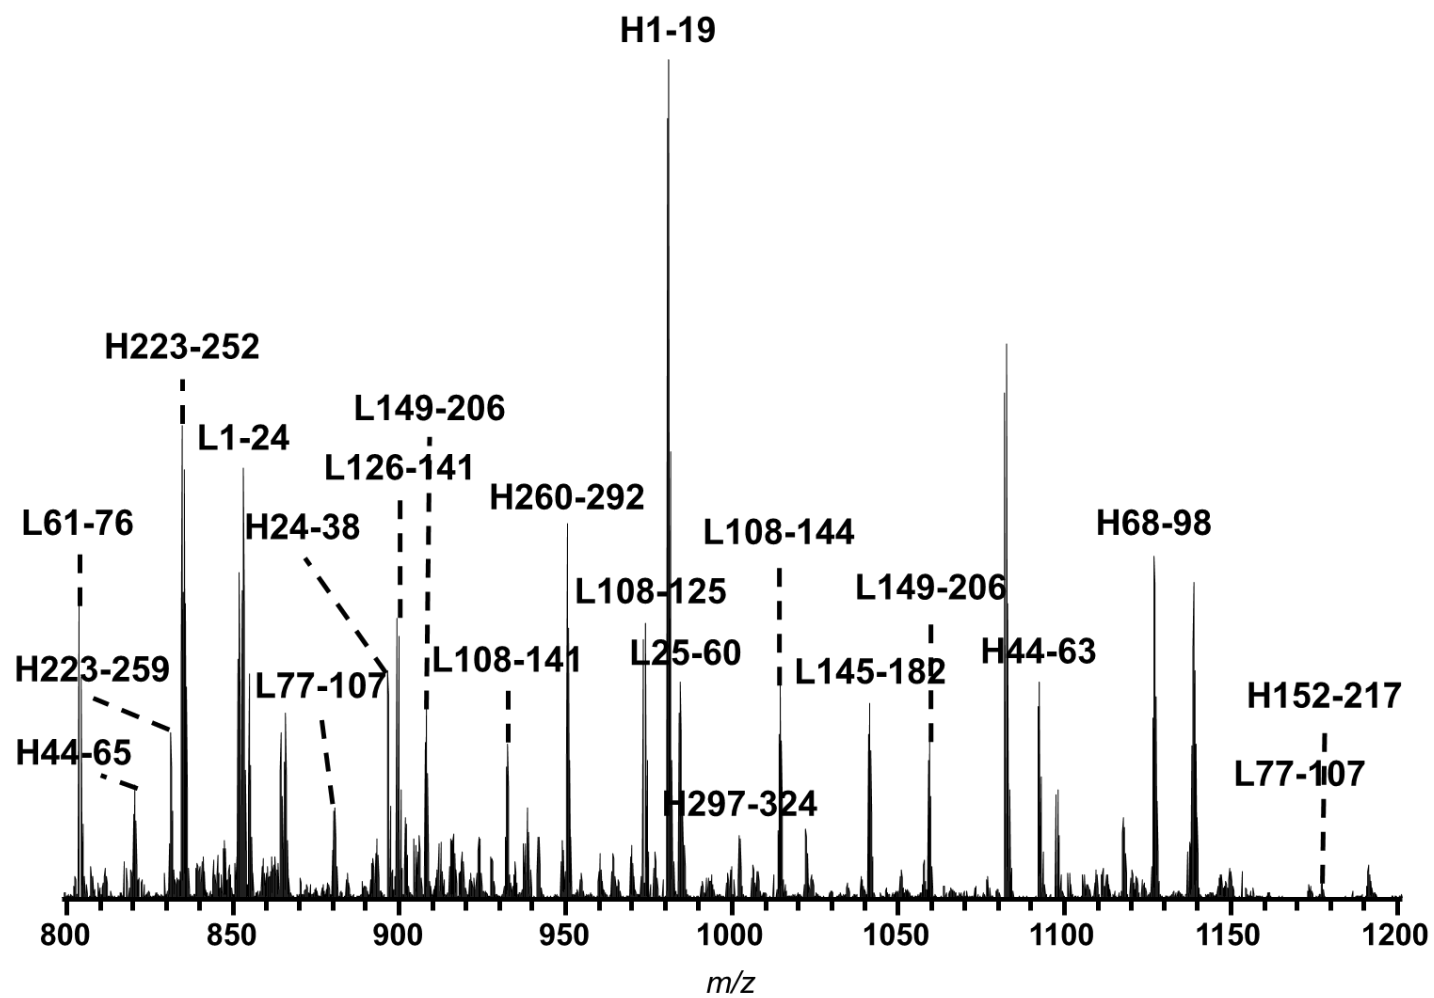

**Figure S-15** (continued). Part of the mass spectrum of a tryptic spin digest of Rituxan. Labels show the amino acids on the Hc and Lc (not all of the peptide signals are labelled).

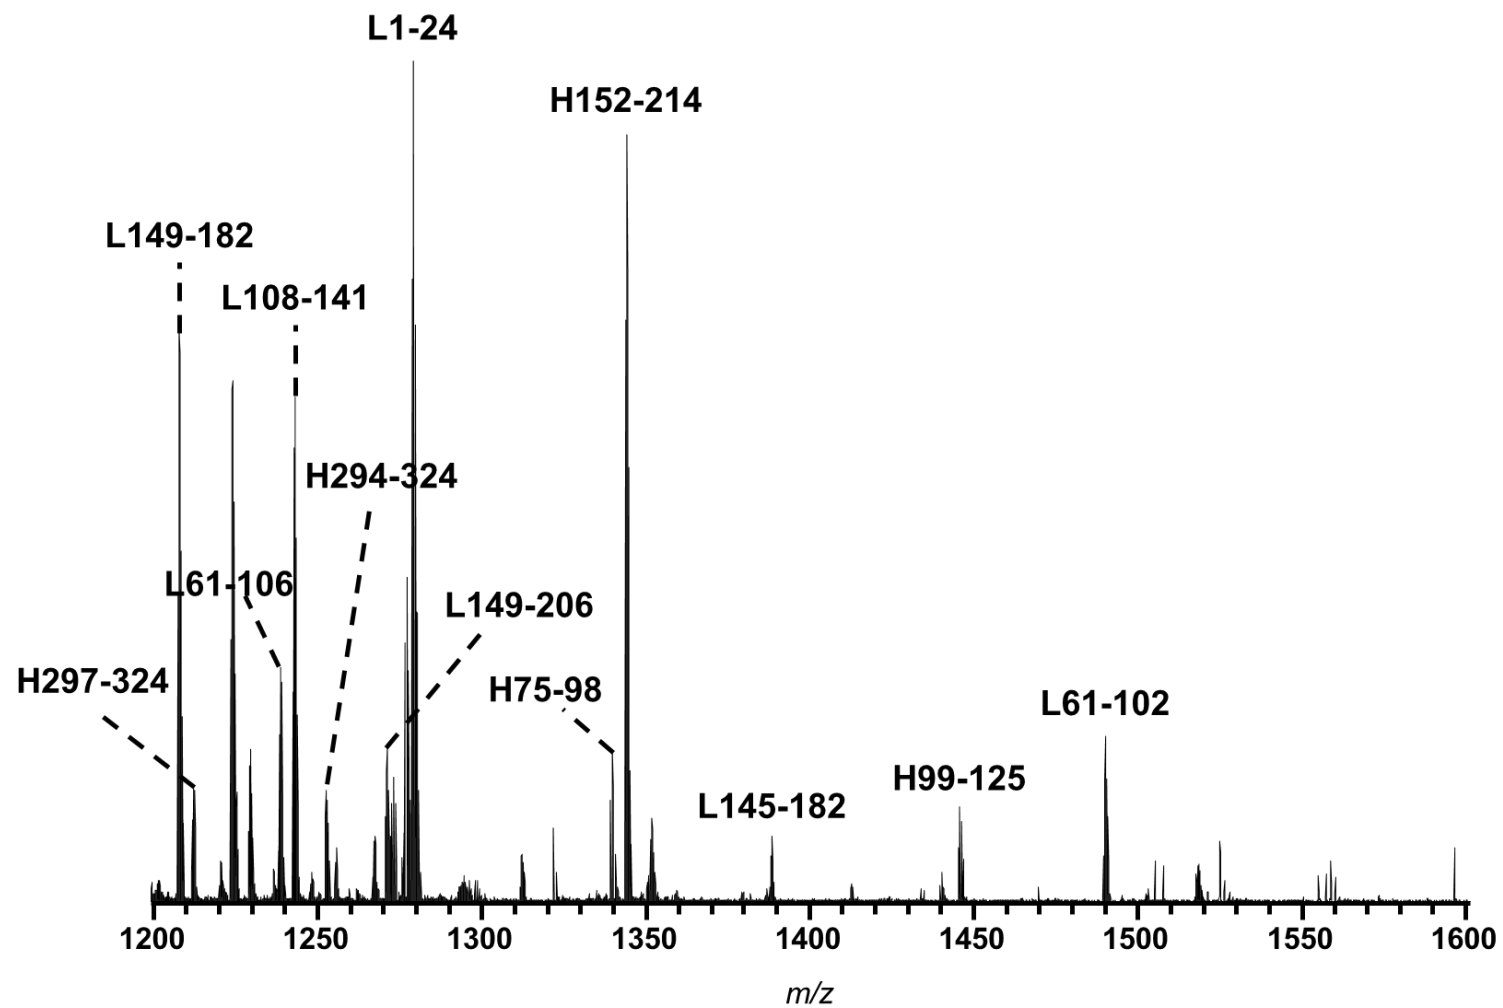

**Figure S-15** (continued). Part of the mass spectrum of a tryptic spin digest of Rituxan. Labels show the amino acids on the Hc and Lc (not all of the peptide signals are labelled).



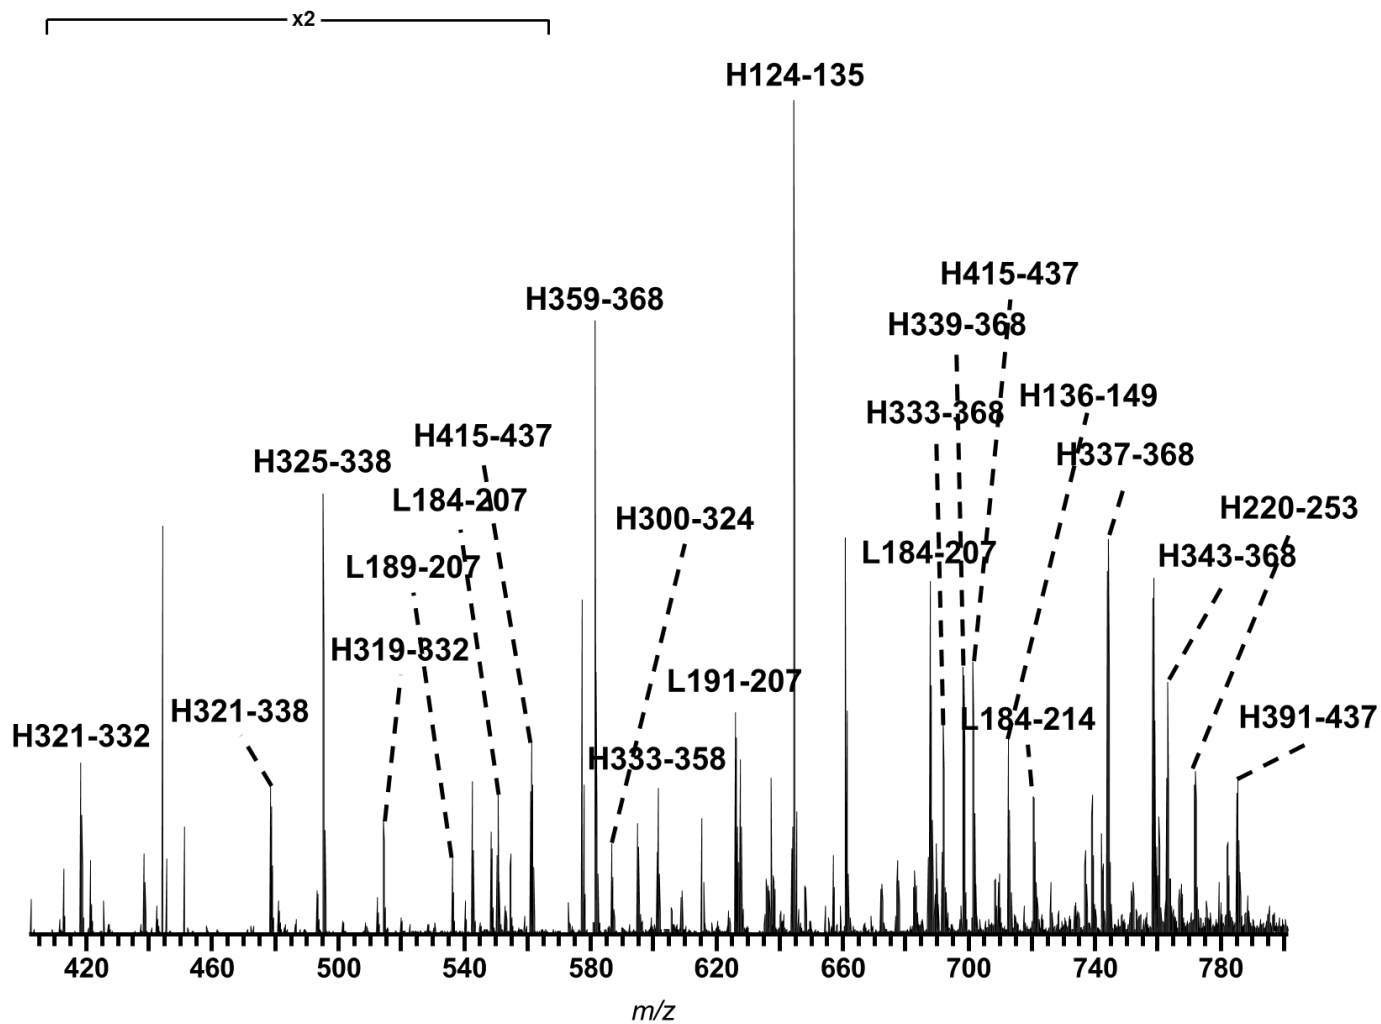

**Figure S-16.** Part of the mass spectrum of a tryptic spin digest of Vectibix. Labels show the amino acids on the Hc and Lc (not all of the peptide signals are labelled).

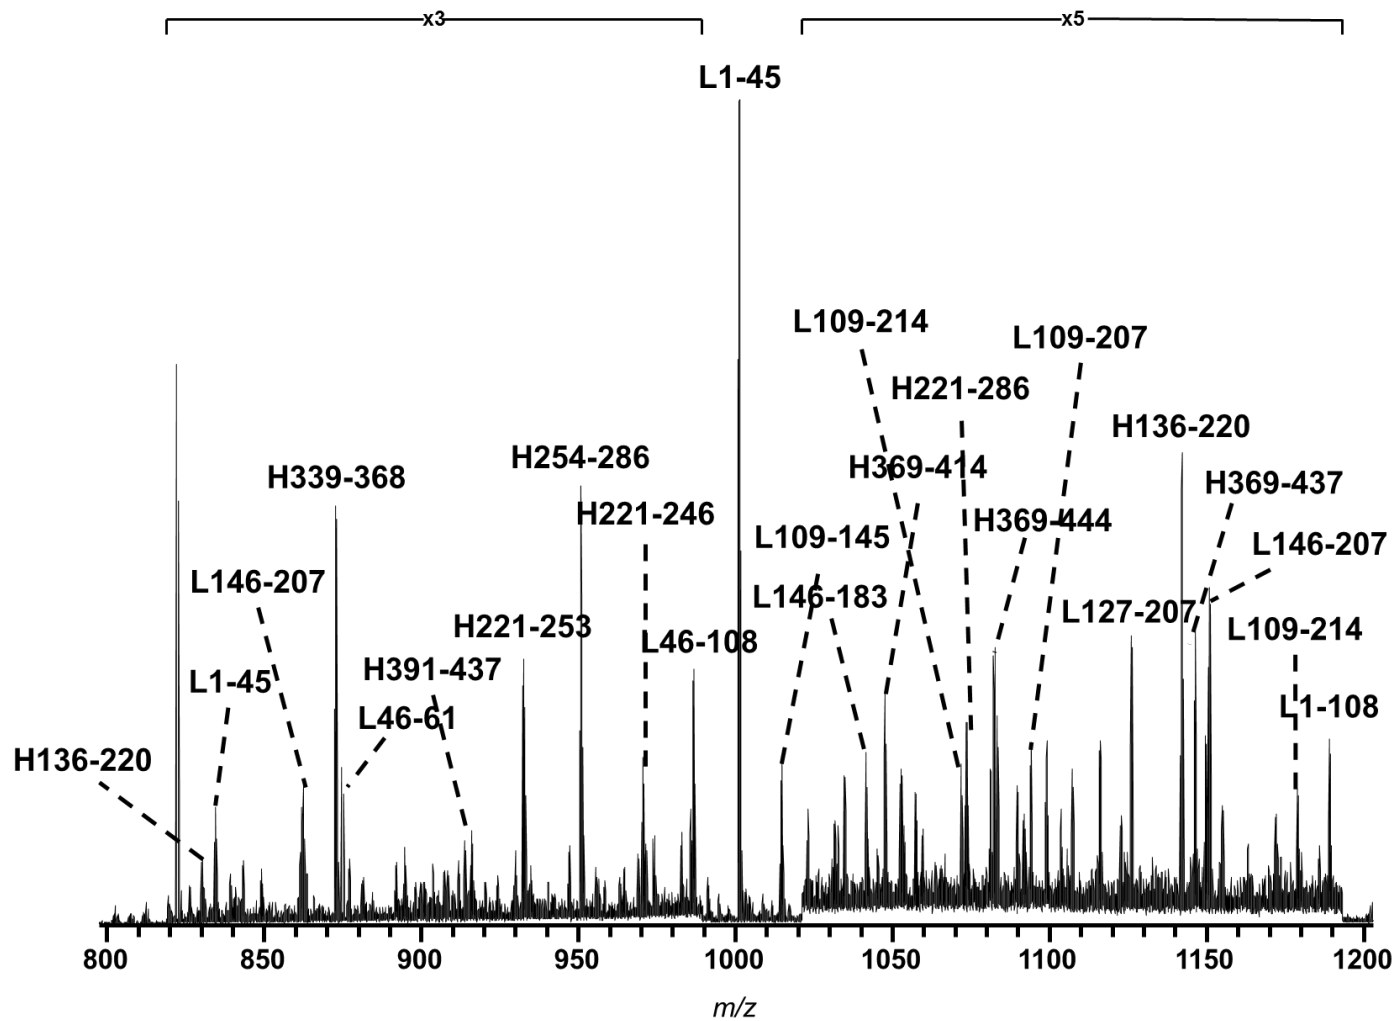

**Figure S-16** (continued). Part of the mass spectrum of a tryptic spin digest of Vectibix. Labels show the amino acids on the Hc and Lc (not all of the peptide signals are labelled).

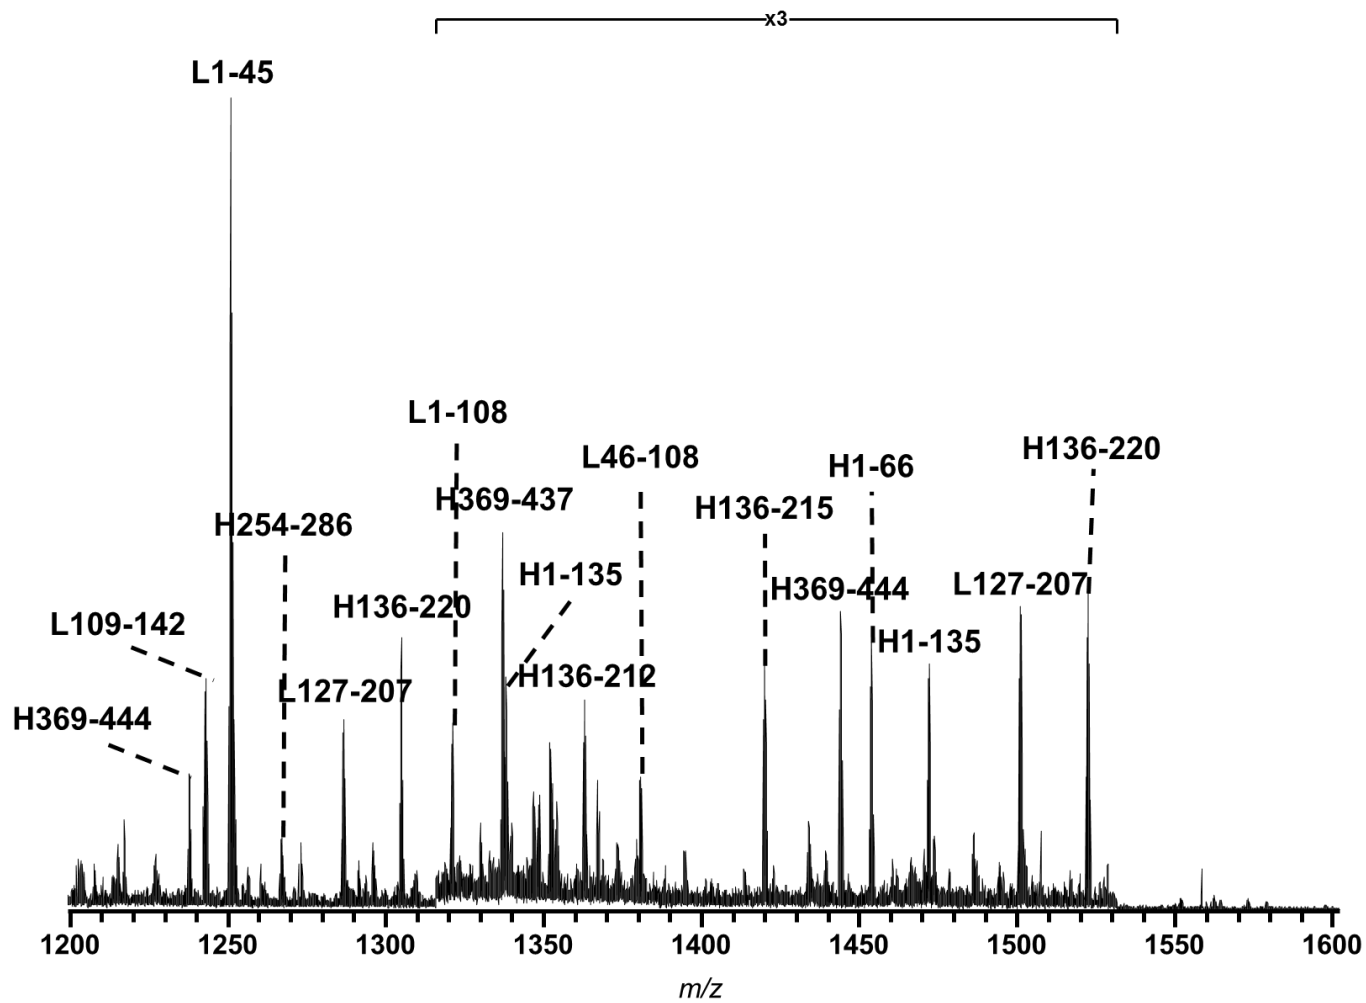

**Figure S-16** (continued). Part of the mass spectrum of a tryptic spin digest of Vectibix. Labels show the amino acids on the Hc and Lc (not all of the peptide signals are labelled).

## Herceptin Trypsin Proteolysis

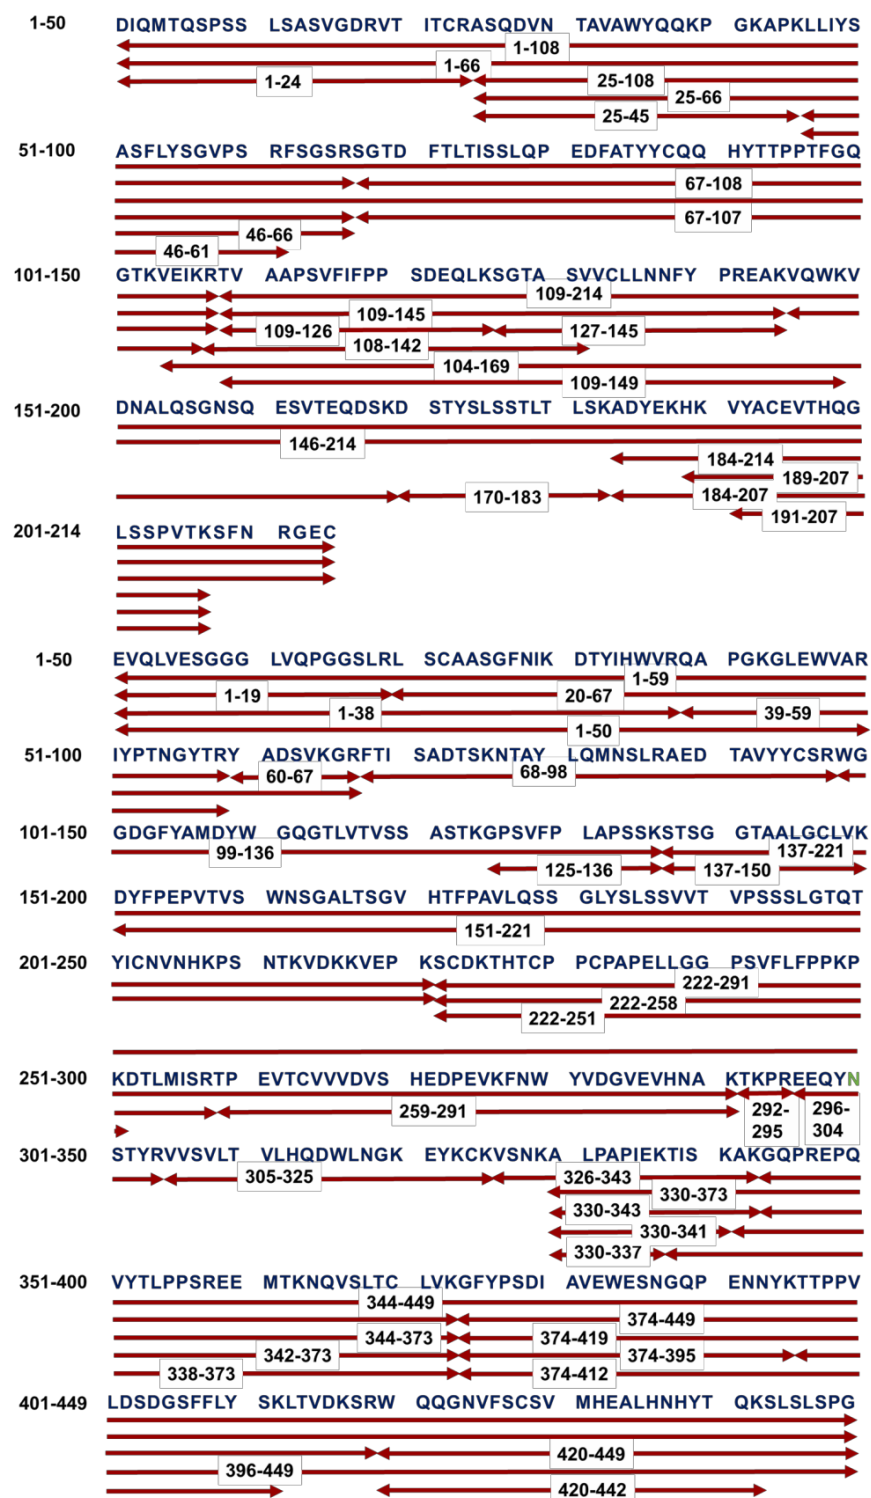

**Figure S-17.** Sequence map of the peptides identified from infusion ESI-Orbitrap analysis of an in-membrane tryptic digest of Herceptin. The light green “N” represents the glycosylation site.

### Avastin Trypsin Proteolysis

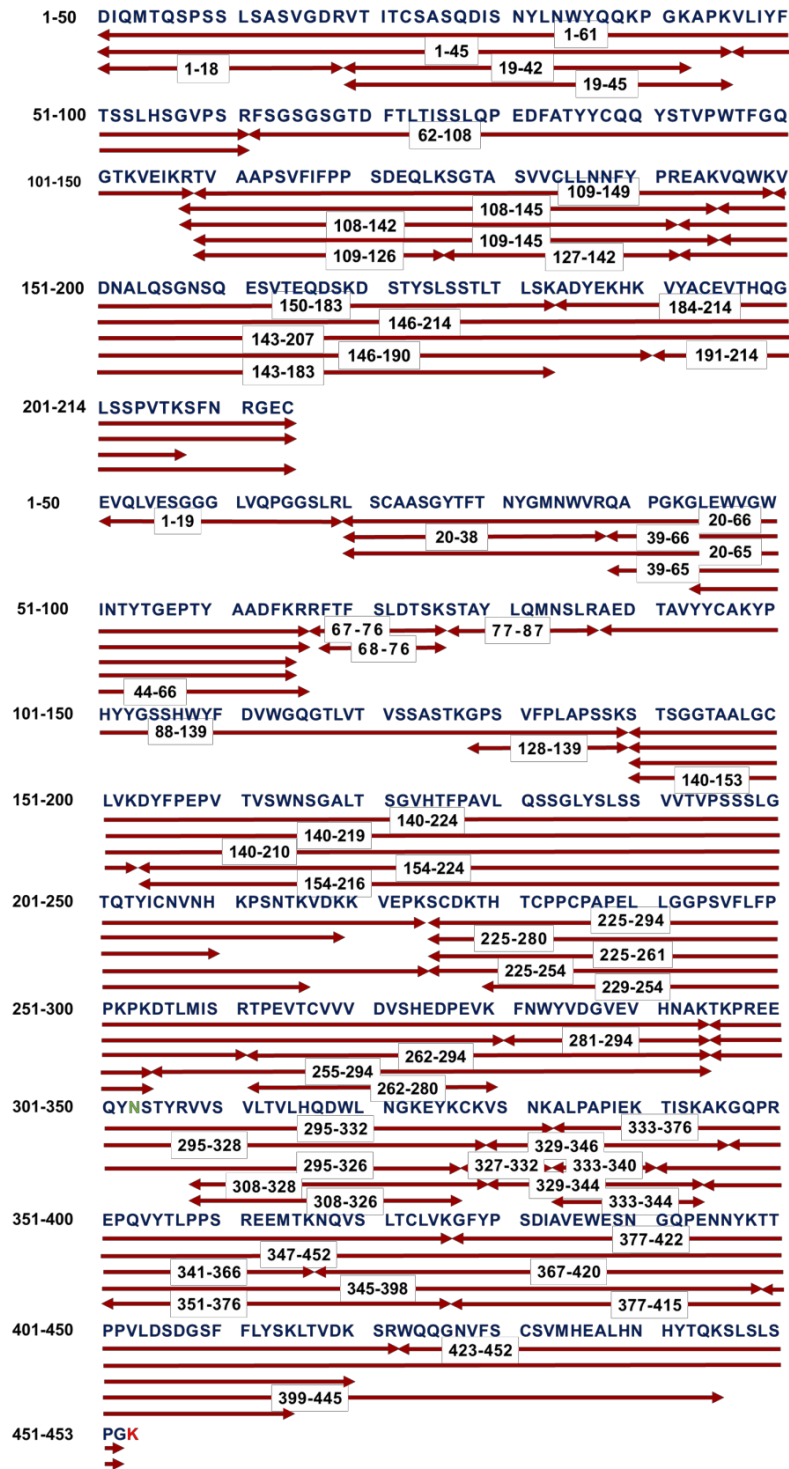

**Figure S-18.** Sequence map of the peptides identified from infusion ESI-Orbitrap analysis of an in-membrane tryptic spin digest of Avastin. The light green “N” represents the glycosylation site, and the red “K” indicates C-terminal lysine clipping.

## Rituxan Trypsin Proteolysis

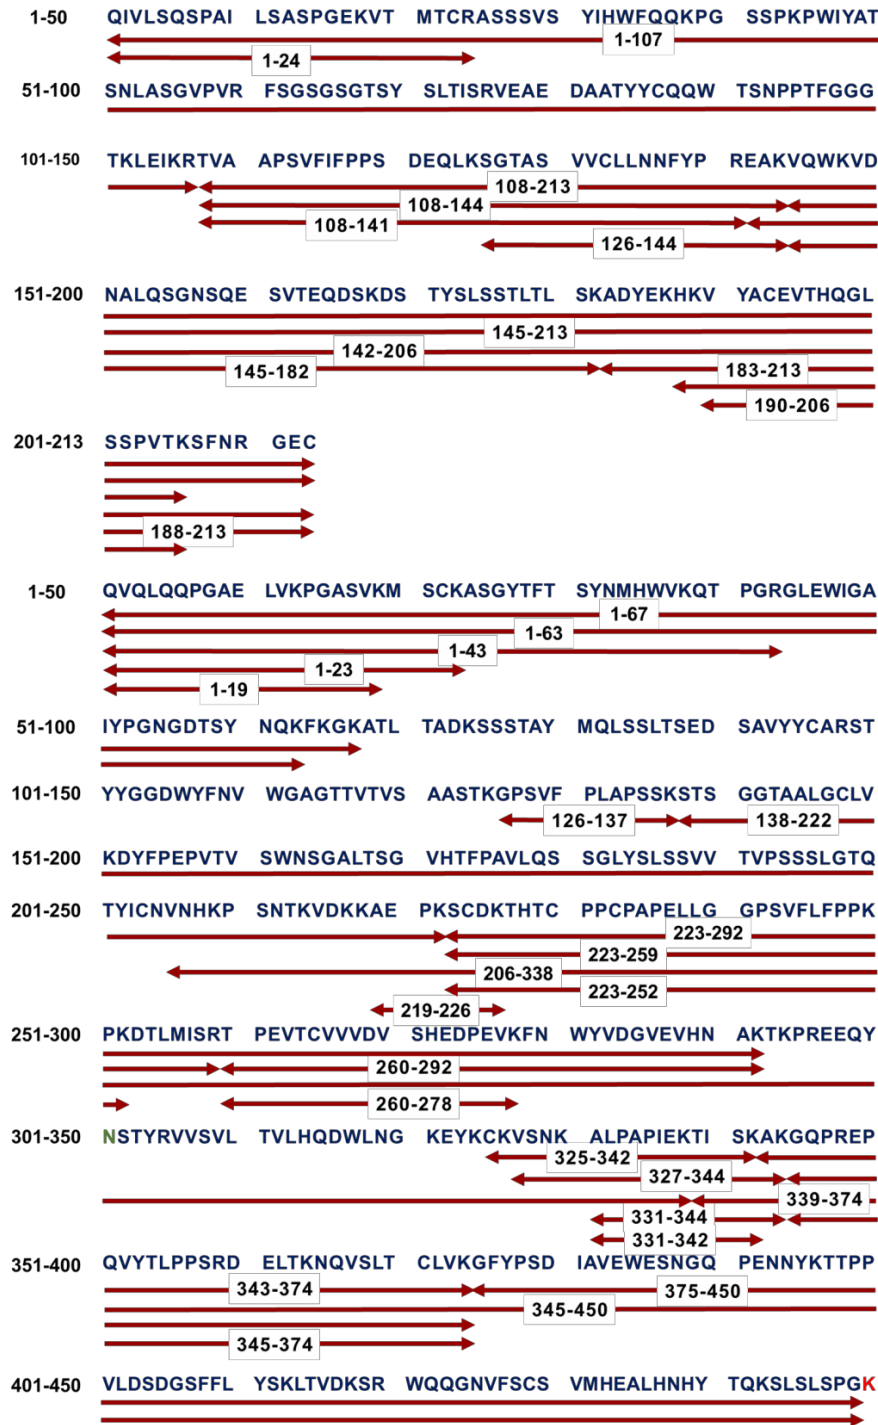

**Figure S-19.** Sequence map of the peptides identified from infusion ESI-Orbitrap analysis of an in-membrane tryptic digest of Rituxan. The light green “N” represents the glycosylation site, and the red “K” denotes C-terminal lysine clipping.

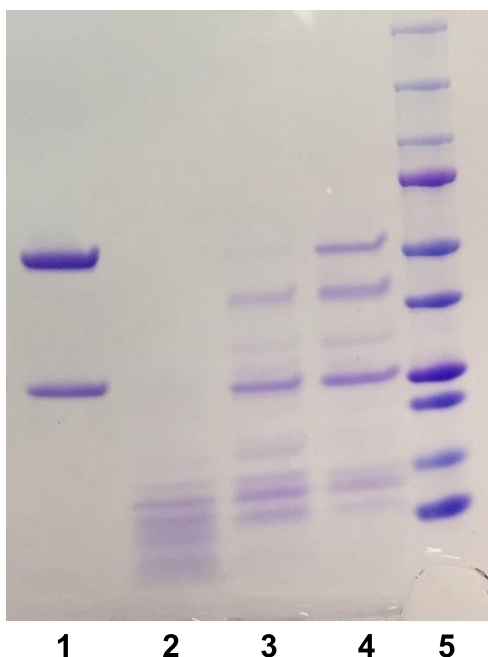

**Figure S-20** Gel electrophoresis (SDS-PAGE) analysis of the reusability of a trypsin spin membrane. Lane 1: 3  $\mu$ g of Avastin; Lanes 2, 3 and 4: 3  $\mu$ g of Avastin tryptic spin digests (spun at 500 g) obtained consecutively from the same membrane; Lane 5: protein standards.

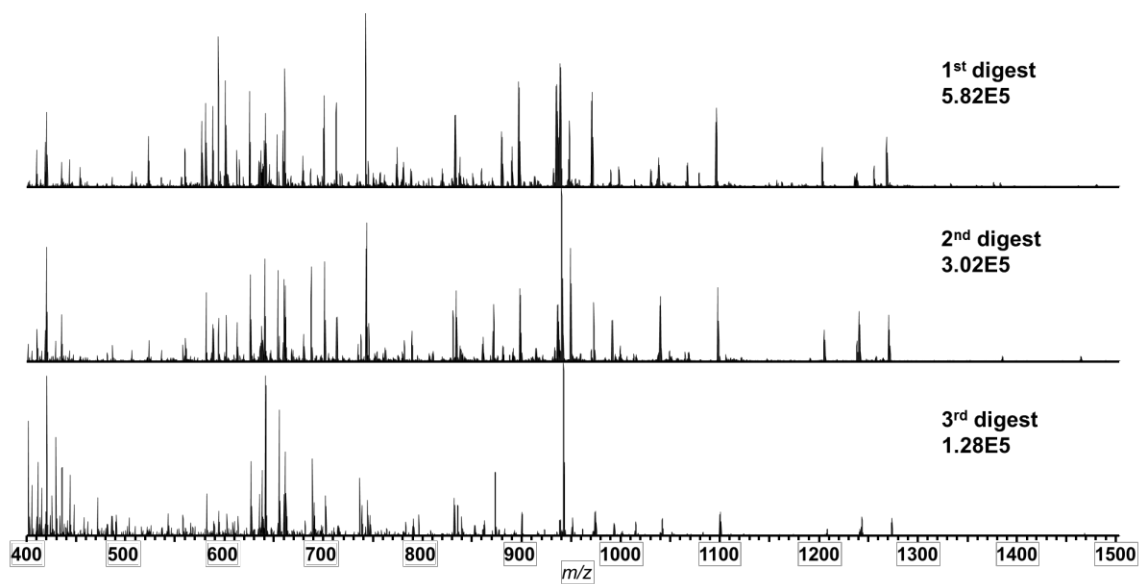

**Figure S-21** Infusion-MS spectra from three consecutive Av tryptic spin digests obtained using the same spin membrane. Digestion occurred at 500 g.

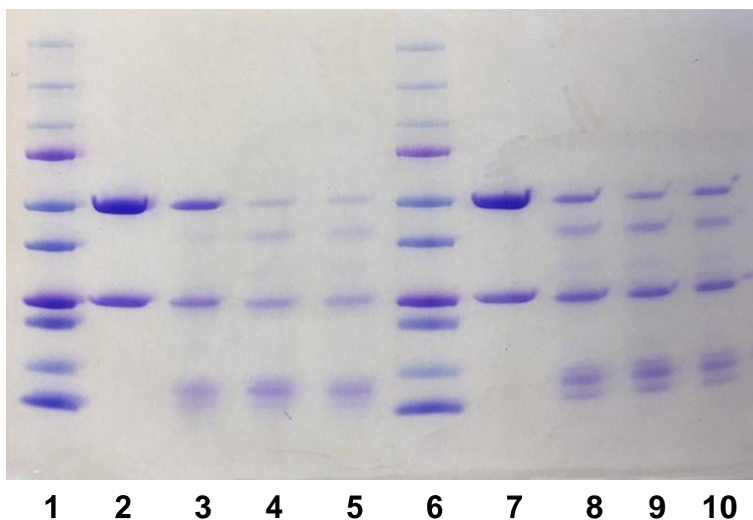

**Figure S-22.** Gel electrophoresis (SDS-PAGE) analysis of tryptic (TPCK-treated) in-solution digestion of He and Av with different incubation times. Lanes 1 and 6: protein standards; Lane 2: 3 µg of He; Lanes 3, 4 and 5: 3 µg of in-solution He digests obtained with incubation times of 5, 30, and 60 min respectively; Lane 7: 3 µg of Av; Lanes 8, 9 and 10: 3 µg of in-solution Av digests with incubation times of 5, 30, and 60 min, respectively.

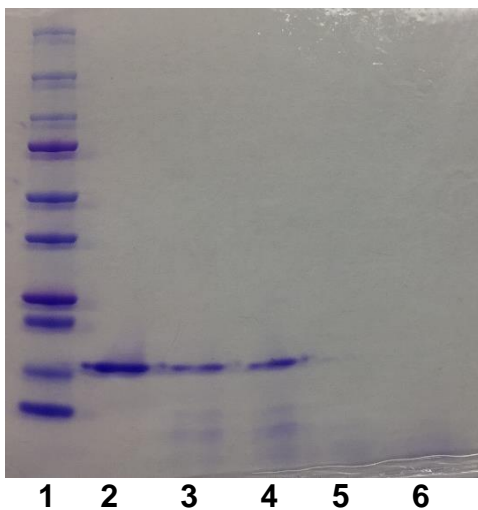

**Figure S-23** Gel electrophoresis (SDS-PAGE) analysis of tryptic (sequencing grade) in-solution digestion of apomyoglobin with different incubation times. Lane 1: protein standards; Lane 2: 3 µg of apomyoglobin; Lanes 3, 4, 5 and 6: 3 µg of apomyoglobin tryptic in-solution digests obtained with incubation times of 5, 15, 30, and 60 min respectively.



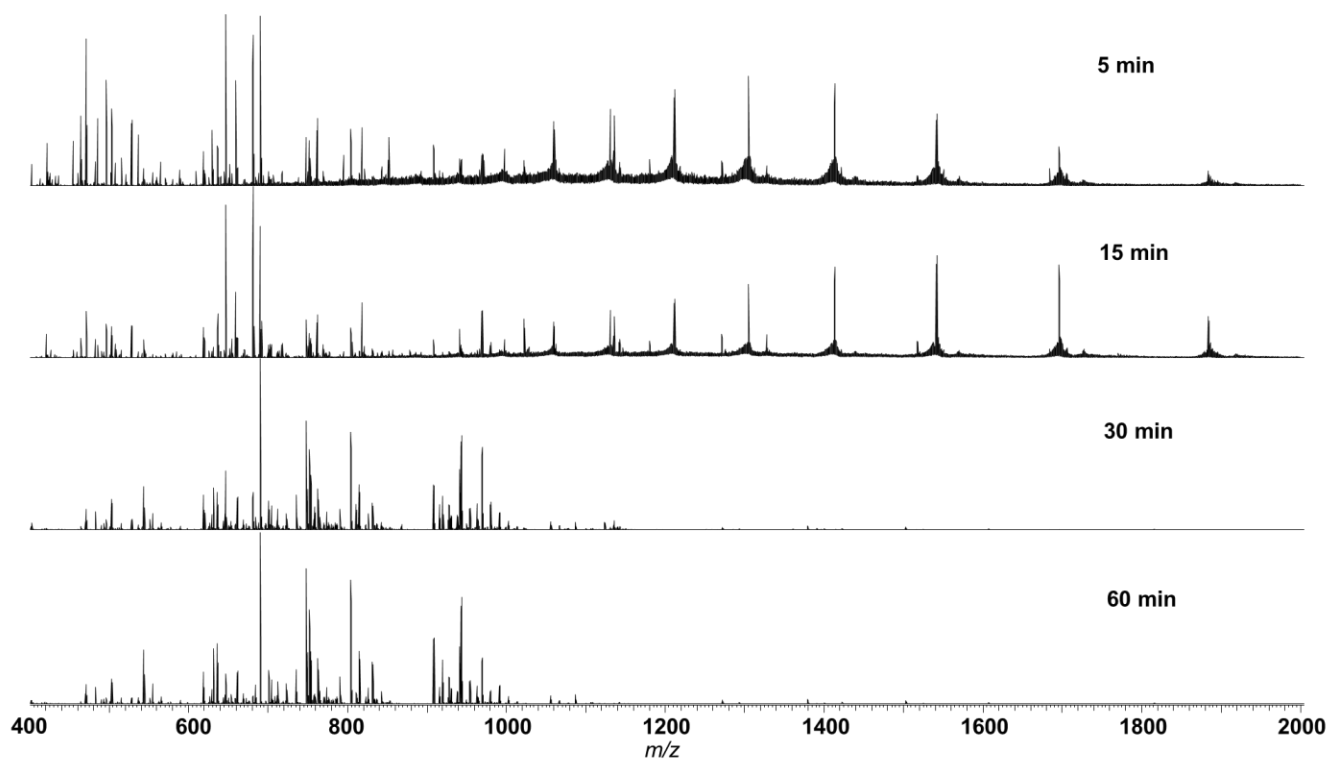

**Figure S-24** Mass spectra of tryptic in-solution digests of apomyoglobin obtained with incubation times of 5, 15, 30, and 60 min (from top to bottom). This digestion employed sequencing-grade trypsin.

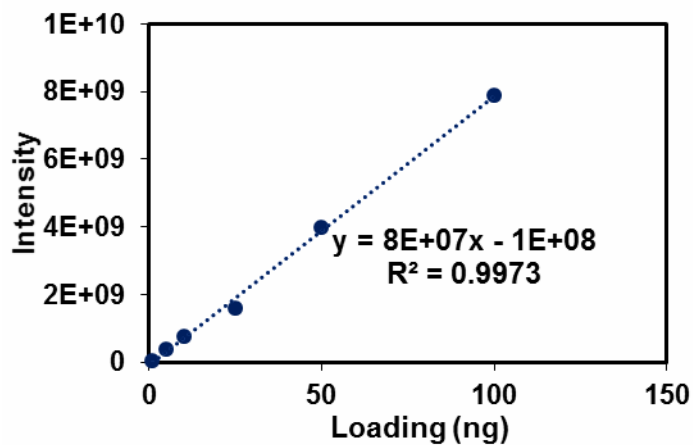

**Figure S-25.** Intensities of peptide ions (nanoLC-MS/MS) from tryptic spin digests of 1, 5, 10, 25, 50, and 100 ng of He in 0.1 mL. The intensities are the sum of the signals for all peptides that were detected at every concentration.

**Table S-1.** Apomyoglobin peptides identified from a spin-membrane (spun at 500 g) peptic digest.

| m/z of [M+H] <sup>+</sup> | Peptide Sequence                                                                            | Amino Acids |
|---------------------------|---------------------------------------------------------------------------------------------|-------------|
| 3134.5542                 | (-)GLSDGEWQQVVLNVWGKVEADIAGHGQEVL(I)                                                        | 1-29        |
| 4651.5069                 | (L)IRLFTGHPETLEKFDKFKHLKTEAEMKAS<br>EDLKKHGTVV(L)                                           | 30-69       |
| 8764.8436                 | (L)IRLFTGHPETLEKFDKFKHLKTEAEMKAS<br>EDLKKHGTVVLTALGGILKKKGHHEAELKPL<br>AQSHATKHKIPIKYLEF(I) | 30-106      |
| 4132.3546                 | (L)TALGGILKKKGHHEAELKPLAQSHATKHKI<br>PIKYLEF(I)                                             | 70-106      |
| 3242.6627                 | (F)ISDAIIHVLHSHKHPGDFGADAQGAMTKAL<br>EL(F)                                                  | 107-137     |
| 2927.5196                 | (D)AIIHVLHSHKHPGDFGADAQGAMTKALE<br>L(F)                                                     | 110-137     |
| 1856.9654                 | (L)FRNDIAAKYKELGFQG(-)                                                                      | 138-153     |

**Table S-2.** Apomyoglobin peptides identified from a spin-membrane (spun at 10,000 g) peptic digest.

| m/z of [M+H] <sup>+</sup> | Peptide Sequence                                                                                                                | Amino Acids |
|---------------------------|---------------------------------------------------------------------------------------------------------------------------------|-------------|
| 3134.5542                 | (-)GLSDGEWQQVVLNVWGKVEADIAGHGQEVL(I)                                                                                            | 1-29        |
| 4651.5069                 | (L)IRLFTGHPETLEKFDKFKHLKTEAEMKAS<br>EDLKKHGTVV(L)                                                                               | 30-69       |
| 8764.8436                 | (L)IRLFTGHPETLEKFDKFKHLKTEAEMKAS<br>EDLKKHGTVVLTALGGILKKKGHHEAELKPL<br>AQSHATKHKIPIKYLEF(I)                                     | 30-106      |
| 9079.9867                 | (L)IRLFTGHPETLEKFDKFKHLKTEAEMKAS<br>EDLKKHGTVVLTALGGILKKKGHHEAELKPL<br>AQSHATKHKIPIKYLEFISD(A)                                  | 30-109      |
| 11988.4885                | (L)IRLFTGHPETLEKFDKFKHLKTEAEMKAS<br>EDLKKHGTVVLTALGGILKKKGHHEAELKPL<br>AQSHATKHKIPIKYLEFISDAIIHVLHSHKHPGD<br>FGADAQGAMTKALEL(F) | 30-137      |
| 4132.3546                 | (L)TALGGILKKKGHHEAELKPLAQSHATKHKI<br>PIKYLEF(I)                                                                                 | 70-106      |
| 3242.6627                 | (F)ISDAIIHVLHSHKHPGDFGADAQGAMTKAL<br>EL(F)                                                                                      | 107-137     |
| 5080.6102                 | (F)ISDAIIHVLHSHKHPGDFGADAQGAMTKAL<br>ELFRNDIAAKYKELGFQG(-)                                                                      | 107-153     |
| 2927.5196                 | (D)AIIHVLHSHKHPGDFGADAQGAMTKALE<br>L(F)                                                                                         | 110-137     |
| 1856.9654                 | (L)FRNDIAAKYKELGFQG(-)                                                                                                          | 138-153     |

**Table S-3.** Apomyoglobin peptides identified from a spin-membrane (spun at 500 g) tryptic digest.

| m/z of [M+H] <sup>+</sup> | Peptide Sequence                              | Amino Acids | Missed Cleavages |
|---------------------------|-----------------------------------------------|-------------|------------------|
| 1815.9024                 | (-)GLSDGEWQQVLNVWGK(V)                        | 1-16        | 0                |
| 3403.7393                 | (-)GLSDGEWQQVLNVWGKVEADIAGHGQEVLR(L)          | 1-31        | 1                |
| 1606.8547                 | (K)VEADIAGHGQEVLR(L)                          | 17-31       | 0                |
| 1271.663                  | (R)LFTGHPETLEK(F)                             | 32-42       | 0                |
| 1937.0167                 | (R)LFTGHPETLEKFDKFK(H)                        | 32-47       | 2                |
| 3004.5601                 | (R)LFTGHPETLEKFDKFKHLKTEAEMK(A)               | 32-56       | 4                |
| 1086.5612                 | (K)HLKTEAEMK(A)                               | 48-56       | 1                |
| 1857.9739                 | (K)HLKTEAEMKASEDLKK(H)                        | 48-63       | 3                |
| 790.4305                  | (K)ASEDLKK(H)                                 | 57-63       | 1                |
| 1378.8417                 | (K)HGTVVLTALGGILK(K)                          | 64-77       | 0                |
| 1506.9366                 | (K)HGTVVLTALGGILKK(K)                         | 64-78       | 1                |
| 1635.0316                 | (K)HGTVVLTALGGILKKK(G)                        | 64-79       | 2                |
| 2110.1516                 | (K)KKGHHEAELKPLAQSHATK(H)                     | 78-96       | 2                |
| 1982.0566                 | (K)KGHHEAELKPLAQSHATK(H)                      | 79-96       | 1                |
| 1853.9617                 | (K)GHHEAELKPLAQSHATK(H)                       | 80-96       | 0                |
| 735.4876                  | (K)HKIPIK(Y)                                  | 97-102      | 1                |
| 2601.4915                 | (K)HKIPIKYLEFISDAIIHVLHLSK(H)                 | 97-118      | 2                |
| 4085.143                  | (K)HKIPIKYLEFISDAIIHVLHLSKHDPGDFGADAQGAMTK(A) | 97-133      | 3                |
| 3819.9891                 | (K)IPIKYLEFISDAIIHVLHLSKHDPGDFGADAQGAMTK(A)   | 99-133      | 2                |
| 1885.0218                 | (K)YLEFISDAIIHVLHLSK(H)                       | 103-118     | 0                |
| 3368.6732                 | (K)YLEFISDAIIHVLHLSKHDPGDFGADAQGAMTK(A)       | 103-133     | 1                |
| 1502.6693                 | (K)HPGDFGADAQGAMTK(A)                         | 119-133     | 0                |
| 1360.7583                 | (K)ALELFRNDIAAK(Y)                            | 134-145     | 1                |
| 2283.2132                 | (K)ALELFRNDIAAKYKELGFQG(-)                    | 134-153     | 3                |
| 922.4993                  | (R)NDIAAKYK(E)                                | 140-147     | 1                |
| 941.4727                  | (K)YKELGFQG(-)                                | 146-153     | 1                |

**Table S-4.** Light- and heavy-chain peptides identified from a spin-membrane (spun at 500 g) peptic digest of **Herceptin**.

| m/z of [M+H] <sup>+</sup> | Peptide Sequence                                             | Amino Acids |
|---------------------------|--------------------------------------------------------------|-------------|
| 1206.5671                 | (-)DIQMTQSPSSL(S)                                            | L1-11       |
| 3267.558                  | (-)DIQMTQSPSSLSASVGDRVTITCRASQDVNT(A)                        | L1-31       |
| 3694.7799                 | (-)DIQMTQSPSSLSASVGDRVTITCRASQDVNTAVAW(Y)                    | L1-35       |
| 4933.4935                 | (-)DIQMTQSPSSLSASVGDRVTITCRASQDVNTAVAWYQQKPGKAPKL(L)         | L1-46       |
| 5567.8261                 | (-)DIQMTQSPSSLSASVGDRVTITCRASQDVNTAVAWYQQKPGKAPKLLIYSAS(F)   | L1-52       |
| 5714.8945                 | (-)DIQMTQSPSSLSASVGDRVTITCRASQDVNTAVAWYQQKPGKAPKLLIYSASF(L)  | L1-53       |
| 5827.9786                 | (-)DIQMTQSPSSLSASVGDRVTITCRASQDVNTAVAWYQQKPGKAPKLLIYSASFL(Y) | L1-54       |
| 2080.0088                 | (L)SASVGDRVTITCRASQDVNT(A)                                   | L12-31      |
| 3745.9443                 | (L)SASVGDRVTITCRASQDVNTAVAWYQQKPGKAPKL(L)                    | L12-46      |
| 1684.9533                 | (T)AVAWYQQKPGKAPKL(L)                                        | L32-46      |
| 2466.3544                 | (T)AVAWYQQKPGKAPKLLIYSASF(L)                                 | L32-53      |
| 2579.4384                 | (T)AVAWYQQKPGKAPKLLIYSASFL(Y)                                | L32-54      |
| 2039.1324                 | (W)YQQKPGKAPKLLIYSASF(L)                                     | L36-53      |
| 2152.2165                 | (W)YQQKPGKAPKLLIYSASFL(Y)                                    | L36-54      |
| 1772.8562                 | (F)LYSGVPSRFSGSRSGTD(F)                                      | L54-70      |
| 1919.9246                 | (F)LYSGVPSRFSGSRSGTDF(T)                                     | L54-71      |
| 3104.5171                 | (F)LYSGVPSRFSGSRSGTDFTLTISSLQPED(F)                          | L54-82      |
| 3251.5855                 | (F)LYSGVPSRFSGSRSGTDFTLTISSLQPEDF(A)                         | L54-83      |
| 3586.7336                 | (F)LYSGVPSRFSGSRSGTDFTLTISSLQPEDFATY(Y)                      | L54-86      |
| 1659.7721                 | (L)YSGVPSRFSGSRSGTD(F)                                       | L55-70      |
| 1806.8406                 | (L)YSGVPSRFSGSRSGTDF(T)                                      | L55-71      |
| 2991.433                  | (L)YSGVPSRFSGSRSGTDFTLTISSLQPED(F)                           | L55-82      |
| 3138.5014                 | (L)YSGVPSRFSGSRSGTDFTLTISSLQPEDF(A)                          | L55-83      |
| 3473.6496                 | (L)YSGVPSRFSGSRSGTDFTLTISSLQPEDFATY(Y)                       | L55-86      |
| 3689.8421                 | (F)ATYYCQQHYTTPPTFGQGKVEIKRTVAAPSVF(I)                       | L84-116     |
| 5346.678                  | (F)ATYYCQQHYTTPPTFGQGKVEIKRTVAAPSVFIFPPSDEQLKSGTASV(V)       | L84-132     |
| 5661.8396                 | (F)ATYYCQQHYTTPPTFGQGKVEIKRTVAAPSVFIFPPSDEQLKSGTASVVCL(L)    | L84-135     |
| 3517.7573                 | (T)YYCQQHYTTPPTFGQGKVEIKRTVAAPSVF(I)                         | L86-116     |
| 5174.5932                 | (T)YYCQQHYTTPPTFGQGKVEIKRTVAAPSVFIFPPSDEQLKSGTASV(V)         | L86-132     |

|            |                                                                                                             |          |
|------------|-------------------------------------------------------------------------------------------------------------|----------|
| 5489.7549  | (T)YYCQQHYTTPPTFGQGTKVEIKRTVAAPSVFIFP<br>PSDEQLKSGTASVVCL(L)                                                | L86-135  |
| 3207.6255  | (Y)YCQQHYTTPPTFGQGTKVEIKRTVAAPSV(F)                                                                         | L87-115  |
| 3354.694   | (Y)YCQQHYTTPPTFGQGTKVEIKRTVAAPSVF(I)                                                                        | L87-116  |
| 5011.5299  | (Y)YCQQHYTTPPTFGQGTKVEIKRTVAAPSVFIFPP<br>SDEQLKSGTASV(V)                                                    | L87-132  |
| 5326.6915  | (Y)YCQQHYTTPPTFGQGTKVEIKRTVAAPSVFIFPP<br>SDEQLKSGTASVVCL(L)                                                 | L87-135  |
| 3191.6306  | (Y)CQQHYTTPPTFGQGTKVEIKRTVAAPSVF(I)                                                                         | L88-116  |
| 1822.9222  | (V)FIFPPSDEQLKSGTASV(V)                                                                                     | L116-132 |
| 2138.0838  | (V)FIFPPSDEQLKSGTASVVCL(L)                                                                                  | L116-135 |
| 1675.8537  | (F)IFPPSDEQLKSGTASV(V)                                                                                      | L117-132 |
| 1991.0154  | (F)IFPPSDEQLKSGTASVVCL(L)                                                                                   | L117-135 |
| 7145.4419  | (V)VCLLNNFYPREAKVQWKVDNALQSGNSQESVT<br>EQDSKDSTYLSSTLTLSKADYEKHKVYACE(V)                                    | L133-195 |
| 9173.4266  | (V)VCLLNNFYPREAKVQWKVDNALQSGNSQESVT<br>EQDSKDSTYLSSTLTLSKADYEKHKVYACEVTHQ<br>GLSSPVTKSFNRGEC(-)             | L133-214 |
| 6830.2803  | (L)LNNFYPREAKVQWKVDNALQSGNSQESVTEQD<br>SKDSTYLSSTLTLSKADYEKHKVYACE(V)                                       | L136-195 |
| 8858.265   | (L)LNNFYPREAKVQWKVDNALQSGNSQESVTEQD<br>SKDSTYLSSTLTLSKADYEKHKVYACEVTHQGLSS<br>PVTKSFNRGEC(-)                | L136-214 |
| 2047.0025  | (E)VTHQGLSSPVTKSFNRGEC(-)                                                                                   | L196-214 |
| 2256.1653  | (-)EVQLVESGGGLVQPGGSLRLSCA(A)                                                                               | H1-23    |
| 2618.3243  | (-)EVQLVESGGGLVQPGGSLRLSCAASGF(N)                                                                           | H1-27    |
| 5982.0872  | (-)EVQLVESGGGLVQPGGSLRLSCAASGFNIKDTYI<br>HWVRQAPGKGLEWVARIYPTNG(Y)                                          | H1-56    |
| 8678.4066  | (-)EVQLVESGGGLVQPGGSLRLSCAASGFNIKDTYI<br>HWVRQAPGKGLEWVARIYPTNGYTRYADSVKGRF<br>TISADTSKNTAY(L)              | H1-80    |
| 9050.5897  | (-)EVQLVESGGGLVQPGGSLRLSCAASGFNIKDTYI<br>HWVRQAPGKGLEWVARIYPTNGYTRYADSVKGRF<br>TISADTSKNTAYLQM(N)           | H1-83    |
| 10107.1097 | (-)EVQLVESGGGLVQPGGSLRLSCAASGFNIKDTYI<br>HWVRQAPGKGLEWVARIYPTNGYTRYADSVKGRF<br>TISADTSKNTAYLQMNSLRAEDTAV(Y) | H1-93    |
| 4775.3576  | (L)SCAASGFNIKDTYIHWVRQAPGKGLEWVARIYPT<br>NGYTRYAD(S)                                                        | H21-62   |
| 7074.5207  | (L)SCAASGFNIKDTYIHWVRQAPGKGLEWVARIYPT<br>NGYTRYADSVKGRFTISADTSKNTAYLQM(N)                                   | H21-83   |
| 6813.4423  | (A)ASGFNIKDTYIHWVRQAPGKGLEWVARIYPTNG<br>YTRYADSVKGRFTISADTSKNTAYLQM(N)                                      | H24-83   |
| 2225.1826  | (F)NIKDTYIHWVRQAPGKGLE(W)                                                                                   | H28-46   |
| 2411.2619  | (F)NIKDTYIHWVRQAPGKGLEW(V)                                                                                  | H28-47   |

|           |                                                                                        |          |
|-----------|----------------------------------------------------------------------------------------|----------|
| 3382.7807 | (F)NIKDTYIHWVRQAPGKGLEWVARIYPTNG(Y)                                                    | H28-56   |
| 6079.1002 | (F)NIKDTYIHWVRQAPGKGLEWVARIYPTNGYTRY<br>ADSVKGRFTISADTSKNTAY(L)                        | H28-80   |
| 6451.2833 | (F)NIKDTYIHWVRQAPGKGLEWVARIYPTNGYTRY<br>ADSVKGRFTISADTSKNTAYLQM(N)                     | H28-83   |
| 7507.8033 | (F)NIKDTYIHWVRQAPGKGLEWVARIYPTNGYTRY<br>ADSVKGRFTISADTSKNTAYLQMNSLRAEDTAV(Y)           | H28-93   |
| 4245.1186 | (E)WVARIYPTNGYTRYADSVKGRFTISADTSKNTAY<br>LQM(N)                                        | H47-83   |
| 3087.5204 | (G)YTRYADSVKGRFTISADTSKNTAYLQM(N)                                                      | H57-83   |
| 1447.721  | (Y)LQMNSLRAEDTAV(Y)                                                                    | H81-93   |
| 2367.0459 | (M)NSLRAEDTAVYYCSRWGGDGF(Y)                                                            | H84-104  |
| 1075.5378 | (M)NSLRAEDTAV(Y)                                                                       | H84-93   |
| 1401.6645 | (M)NSLRAEDTAVYY(C)                                                                     | H84-95   |
| 1310.5259 | (V)YYCSRWGGDGF(Y)                                                                      | H94-104  |
| 1147.4626 | (Y)YCSRWGGDGF(Y)                                                                       | H95-104  |
| 984.3992  | (Y)CSRWGGDGF(Y)                                                                        | H96-104  |
| 1304.5616 | (F)YAMDYWGQGT(L)                                                                       | H105-115 |
| 2952.4983 | (L)VTVSSASTKGPSVFPLAPSSKSTSGGTAALGC(L)                                                 | H116-147 |
| 3065.5823 | (L)VTVSSASTKGPSVFPLAPSSKSTSGGTAALGC<br>L(V)                                            | H116-148 |
| 6637.3811 | (L)VTVSSASTKGPSVFPLAPSSKSTSGGTAALGCLV<br>KDYFPEPVTVSWNSGALTSGVHTFPAVLQSSGL(Y)          | H116-182 |
| 3118.5884 | (C)LVKDYFPEPVTVSWNSGALTSGVHTFPAV(L)                                                    | H148-176 |
| 3703.9006 | (C)LVKDYFPEPVTVSWNSGALTSGVHTFPAVLQSS<br>GL(Y)                                          | H148-182 |
| 3590.8166 | (L)VKDYFPEPVTVSWNSGALTSGVHTFPAVLQSSG<br>L(Y)                                           | H149-182 |
| 1812.9226 | (L)YSLSSVTVPSSSLGTQT(Y)                                                                | H183-200 |
| 5914.9122 | (L)YSLSSVTVPSSSLGTQTYICNVNHKPSNTKVDK<br>KVEPKSCDKTHTCPPCPAPEL(L)                       | H183-237 |
| 6425.1924 | (L)YSLSSVTVPSSSLGTQTYICNVNHKPSNTKVDK<br>KVEPKSCDKTHTCPPCPAPELLGGPSV(F)                 | H183-243 |
| 6572.2608 | (L)YSLSSVTVPSSSLGTQTYICNVNHKPSNTKVDK<br>KVEPKSCDKTHTCPPCPAPELLGGPSVF(L)                | H183-244 |
| 7708.9202 | (L)YSLSSVTVPSSSLGTQTYICNVNHKPSNTKVDK<br>KVEPKSCDKTHTCPPCPAPELLGGPSVFLFPPKPK<br>DTL(M)  | H183-254 |
| 7839.9607 | (L)YSLSSVTVPSSSLGTQTYICNVNHKPSNTKVDK<br>KVEPKSCDKTHTCPPCPAPELLGGPSVFLFPPKPK<br>DTLM(I) | H183-255 |
| 4631.2877 | (T)YICNVNHKPSNTKVDK KVEPKSCDKTHTCPPCP<br>APELLGGPSV(F)                                 | H201-243 |
| 1944.0663 | (L)LGGPSVFLFPPKPKDTLM(I)                                                               | H238-255 |
| 1433.7861 | (V)FLFPPKPKDTLM(I)                                                                     | H244-255 |

|           |                                                                          |          |
|-----------|--------------------------------------------------------------------------|----------|
| 1286.7177 | (F)LFPPKPKDTLM(I)                                                        | H245-255 |
| 2273.2032 | (F)LFPPKPKDTLMISRTPEVTC(V)                                               | H245-264 |
| 1136.5438 | (L)MISRTPEVTC(V)                                                         | H255-264 |
| 1005.5034 | (M)ISRTPEVTC(V)                                                          | H256-264 |
| 1104.5718 | (M)ISRTPEVTCV(V)                                                         | H256-265 |
| 1898.9283 | (C)VVDVSHEDPEVKFNW(Y)                                                    | H265-280 |
| 6705.1696 | (C)VVDVSHEDPEVKFNWYVDGVEVHNAKTKPRE<br>EQYNSTYRVVSVL(T)*                  | H265-309 |
| 6867.2114 | (C)VVDVSHEDPEVKFNWYVDGVEVHNAKTKPRE<br>EQYNSTYRVVSVL(T)**                 | H265-309 |
| 1799.8599 | (V)VVDVSHEDPEVKFNW(Y)                                                    | H266-280 |
| 6606.0918 | (V)VVDVSHEDPEVKFNWYVDGVEVHNAKTKPRE<br>QYNSTYRVVSVL(T)***                 | H266-309 |
| 6703.5491 | (L)TVLHQDWLNGKEYKCKVSNKALPAPIEKTISKAK<br>GQPREPQVYTLPPSREEMTKNQVSL(T)    | H310-368 |
| 6907.606  | (L)TVLHQDWLNGKEYKCKVSNKALPAPIEKTISKAK<br>GQPREPQVYTLPPSREEMTKNQVSLTC(L)  | H310-370 |
| 7020.69   | (L)TVLHQDWLNGKEYKCKVSNKALPAPIEKTISKAK<br>GQPREPQVYTLPPSREEMTKNQVSLTCL(V) | H310-371 |
| 1229.5871 | (L)TCLVKGFYPSD(I)                                                        | H369-379 |
| 1128.5394 | (T)CLVKGFYPSD(I)                                                         | H370-379 |
| 1025.5302 | (C)LVKGFYPSD(I)                                                          | H371-379 |
| 1437.7624 | (C)LVKGFYPSDIAVE(W)                                                      | H371-383 |
| 912.4462  | (L)VKGFYPSD(I)                                                           | H372-379 |
| 1324.6783 | (L)VKGFYPSDIAVE(W)                                                       | H372-383 |
| 3379.6481 | (L)VKGFYPSDIAVEWESNGQPENNYKTTTPVL(D)                                     | H372-401 |
| 2486.2198 | (D)IAVEWESNGQPENNYKTTTPVL(D)                                             | H380-401 |
| 3094.4276 | (D)IAVEWESNGQPENNYKTTTPVLDSDGSF(F)                                       | H380-407 |
| 2316.2135 | (F)FLYSKLTVDKSRWQQGNVF(S)                                                | H408-426 |
| 4823.3821 | (F)FLYSKLTVDKSRWQQGNVFSVMHEALHNHY<br>TQKSLSLSPG(-)                       | H408-449 |
| 4563.2296 | (L)YSKLTVDKSRWQQGNVFSVMHEALHNHYTQ<br>KSLSLSPG(-)                         | H410-449 |
| 2526.1864 | (F)SCSVMHEALHNHYTQKSLSLSPG(-)                                            | H427-449 |
| 2336.1452 | (C)SVMHEALHNHYTQKSLSLSPG(-)                                              | H429-449 |

\*6705.1696 is the monoisotopic mass for H265-309 with G0F glycosylation.

\*\*6867.2114 is the monoisotopic mass for H265-309 with G1F glycosylation.

\*\*\*6606.0918 is the monoisotopic mass for H266-309 with G0F glycosylation.

**Table S-5.** Light- and heavy-chain peptides identified from a spin-membrane (spun at 500 g) peptic digest of **Avastin**.

| m/z of [M+H] <sup>+</sup> | Peptide Sequence                                                                                      | Amino Acids |
|---------------------------|-------------------------------------------------------------------------------------------------------|-------------|
| 5388.6879                 | (-)DIQMTQSPSSLSASVGDRVITITCSASQDISNYL<br>NWYQQKPGKAPKVLIIY(F)                                         | L1-49       |
| 5923.9521                 | (-)DIQMTQSPSSLSASVGDRVITITCSASQDISNYL<br>NWYQQKPGKAPKVLIIYFTSSL(H)                                    | L1-54       |
| 7439.6223                 | (-)DIQMTQSPSSLSASVGDRVITITCSASQDISNYL<br>NWYQQKPGKAPKVLIIYFTSSLHSGVPSRFSGSGS<br>GTD(F)                | L1-70       |
| 8771.2832                 | (-)DIQMTQSPSSLSASVGDRVITITCSASQDISNYL<br>NWYQQKPGKAPKVLIIYFTSSLHSGVPSRFSGSGS<br>GTDFTLTISLQPED(F)     | L1-82       |
| 8918.3517                 | (-)DIQMTQSPSSLSASVGDRVITITCSASQDISNYL<br>NWYQQKPGKAPKVLIIYFTSSLHSGVPSRFSGSGS<br>GTDFTLTISLQPEDF(A)    | L1-83       |
| 9090.4364                 | (-)DIQMTQSPSSLSASVGDRVITITCSASQDISNYL<br>NWYQQKPGKAPKVLIIYFTSSLHSGVPSRFSGSGS<br>GTDFTLTISLQPEDFAT(Y)  | L1-85       |
| 9253.4998                 | (-)DIQMTQSPSSLSASVGDRVITITCSASQDISNYL<br>NWYQQKPGKAPKVLIIYFTSSLHSGVPSRFSGSGS<br>GTDFTLTISLQPEDFATY(Y) | L1-86       |
| 2069.9523                 | (Y)FTSSLHSGVPSRFSGSGSGTD(F)                                                                           | L50-70      |
| 3013.4174                 | (L)HSGVPSRFSGSGSGTDFTLTISLQPEDF(A)                                                                    | L55-83      |
| 3185.5022                 | (L)HSGVPSRFSGSGSGTDFTLTISLQPEDFAT(Y)                                                                  | L55-85      |
| 3726.8625                 | (F)ATYYCQQYSTVPWTFGQGTKVEIKRTVAAPSV<br>F(I)                                                           | L84-116     |
| 3244.6459                 | (Y)YCQQYSTVPWTFGQGTKVEIKRTVAAPSV(F)                                                                   | L87-115     |
| 3391.7144                 | (Y)YCQQYSTVPWTFGQGTKVEIKRTVAAPSVF(I)                                                                  | L87-116     |
| 5048.5503                 | (Y)YCQQYSTVPWTFGQGTKVEIKRTVAAPSVFIF<br>PPSDEQLKSGTASV(V)                                              | L87-132     |
| 5363.7119                 | (Y)YCQQYSTVPWTFGQGTKVEIKRTVAAPSVFIF<br>PPSDEQLKSGTASVVCL(L)                                           | L87-135     |
| 2722.4563                 | (Q)YSTVPWTFGQGTKVEIKRTVAAPSV(F)                                                                       | L91-115     |
| 2869.5247                 | (Q)YSTVPWTFGQGTKVEIKRTVAAPSVF(I)                                                                      | L91-116     |
| 4526.3606                 | (Q)YSTVPWTFGQGTKVEIKRTVAAPSVFIFPPSDE<br>QLKSGTASV(V)                                                  | L91-132     |
| 4841.5223                 | (Q)YSTVPWTFGQGTKVEIKRTVAAPSVFIFPPSDE<br>QLKSGTASVVCL(L)                                               | L91-135     |
| 1822.9222                 | (V)FIFPPSDEQLKSGTASV(V)                                                                               | L116-132    |
| 2138.0838                 | (V)FIFPPSDEQLKSGTASVVCL(L)                                                                            | L116-135    |
| 1675.8537                 | (F)IFPPSDEQLKSGTASV(V)                                                                                | L117-132    |
| 1991.0154                 | (F)IFPPSDEQLKSGTASVVCL(L)                                                                             | L117-135    |



|            |                                                                                                                  |          |
|------------|------------------------------------------------------------------------------------------------------------------|----------|
| 10830.2625 | (F)IFPPSDEQLKSGTASVVCLLNNFYPPREAKVQW<br>KVDNALQSGNSQESVTEQDSKDSTYLSSTLTLS<br>KADYEKHKVYACEVTHQGLSSPVTKSFNRGEC(-) | L117-214 |
| 7145.4419  | (V)VCLLNNFYPPREAKVQWKVDNALQSGNSQESV<br>TEQDSKDSTYLSSTLTLSKADYEKHKVYACE(V)                                        | L133-195 |
| 9173.4266  | (V)VCLLNNFYPPREAKVQWKVDNALQSGNSQESV<br>TEQDSKDSTYLSSTLTLSKADYEKHKVYACEVT<br>HQGLSSPVTKSFNRGEC(-)                 | L133-214 |
| 6830.2803  | (L)LNNFYPPREAKVQWKVDNALQSGNSQESVTEQ<br>DSKDSTYLSSTLTLSKADYEKHKVYACE(V)                                           | L136-195 |
| 8858.265   | (L)LNNFYPPREAKVQWKVDNALQSGNSQESVTEQ<br>DSKDSTYLSSTLTLSKADYEKHKVYACEVTHQG<br>LSSPVTKSFNRGEC(-)                    | L136-214 |
| 2047.0025  | (E)VTHQGLSSPVTKSFNRGEC(-)                                                                                        | L196-214 |
| 3562.6941  | (-)EVQLVESGGGLVQPGGSLRLSCAASGYTFTNY<br>GMN(W)                                                                    | H1-35    |
| 2097.1029  | (N)WVRQAPGKGLEWVGWINT(Y)                                                                                         | H36-53   |
| 3165.5429  | (N)WVRQAPGKGLEWVGWINTYTGEPTYAAD(F)                                                                               | H36-63   |
| 3312.6113  | (N)WVRQAPGKGLEWVGWINTYTGEPTYAADF(K)                                                                              | H36-64   |
| 5573.7739  | (N)WVRQAPGKGLEWVGWINTYTGEPTYAADFKR<br>RFTFSLDTSKSTAYLQM(N)                                                       | H36-83   |
| 6630.2939  | (N)WVRQAPGKGLEWVGWINTYTGEPTYAADFKR<br>RFTFSLDTSKSTAYLQMNSLRAEDTAV(Y)                                             | H36-93   |
| 3495.6889  | (T)YTGEPTYAADFKRRFTFSLDTSKSTAYLQM(N)                                                                             | H54-83   |
| 2427.2489  | (D)FKRRFTFSLDTSKSTAYLQM(N)                                                                                       | H64-83   |
| 2280.1805  | (F)KRRFTFSLDTSKSTAYLQM(N)                                                                                        | H65-83   |
| 4147.8708  | (M)NSLRAEDTAVYYCAKYPHYGGSSHWYFDVW<br>GQGTL(V)                                                                    | H54-118  |
| 1075.5378  | (M)NSLRAEDTAV(Y)                                                                                                 | H84-93   |
| 3091.3508  | (V)YYCAKYPHYGGSSHWYFDVWGQGTL(V)                                                                                  | H94-118  |
| 3065.5823  | (L)VTVSSASTKGPSVFPLAPSSKSTSGGTAALGC<br>L(V)                                                                      | H119-151 |
| 6165.1529  | (L)VTVSSASTKGPSVFPLAPSSKSTSGGTAALGC<br>LVKDYFPEPVTVSWNSGALTSGVHTFPAVL(Q)                                         | H119-180 |
| 6637.3811  | (L)VTVSSASTKGPSVFPLAPSSKSTSGGTAALGC<br>LVKDYFPEPVTVSWNSGALTSGVHTFPAVLQSSG<br>L(Y)                                | H119-185 |
| 3118.5884  | (L)VKDYFPEPVTVSWNSGALTSGVHTFPAVL(Q)                                                                              | H152-180 |
| 3590.8166  | (L)VKDYFPEPVTVSWNSGALTSGVHTFPAVLQSS<br>GL(Y)                                                                     | H152-185 |
| 6425.1924  | (L)YSLSSVTVPSSSLGTQTYICNVNHKPSNTKVD<br>KKVEPKSCDKTHTCPPCPAPELLGGPSV(F)                                           | H186-246 |
| 6572.2608  | (L)YSLSSVTVPSSSLGTQTYICNVNHKPSNTKVD<br>KKVEPKSCDKTHTCPPCPAPELLGGPSV(L)                                           | H186-247 |

|           |                                                                                                  |          |
|-----------|--------------------------------------------------------------------------------------------------|----------|
| 7839.9607 | (L)YSLSSVVTVPSSSLGTQTYICNVNHKPSNTKVD<br>KKVEPKSCDKTHTCPPCPAPELLGGPSVFLFPPK<br>PKDTLM(I)          | H186-258 |
| 8826.4462 | (L)YSLSSVVTVPSSSLGTQTYICNVNHKPSNTKVD<br>KKVEPKSCDKTHTCPPCPAPELLGGPSVFLFPPK<br>PKDTLMISRTPEVTC(V) | H186-267 |
| 6046.056  | (T)YICNVNHKPSNTKVDKKVEPKSCDKTHTCPPC<br>PAPELLGGPSVFLFPPKPKDTLM(I)                                | H204-258 |
| 1944.0663 | (L)LGGPSVFLFPPKPKDTLM(I)                                                                         | H241-258 |
| 1433.7861 | (V)FLFPPKPKDTLM(I)                                                                               | H247-258 |
| 1286.7177 | (F)LFPPKPKDTLM(I)                                                                                | H248-258 |
| 2273.2032 | (F)LFPPKPKDTLMISRTPEVTC(V)                                                                       | H248-267 |
| 1005.5034 | (M)ISRTPEVTC(V)                                                                                  | H259-267 |
| 998.4789  | (C)VVVDVSHED(P)                                                                                  | H268-276 |
| 1898.9283 | (C)VVVDVSHEDPEVKFNW(Y)                                                                           | H268-283 |
| 6705.1942 | (C)VVVDVSHEDPEVKFNWYVDGVEVHNAKTKPR<br>EEQYNSTYRVVSVL(T)*                                         | H268-312 |
| 6867.244  | (C)VVVDVSHEDPEVKFNWYVDGVEVHNAKTKPR<br>EEQYNSTYRVVSVL(T)**                                        | H268-312 |
| 5725.726  | (D)PEVKFNWYVDGVEVHNAKTKPREEQYNSTYR<br>VVSVL(T)***                                                | H277-312 |
| 6703.5491 | (L)TVLHQDWLNGKEYKCKVSNKALPAPIEKTISKA<br>KGQPREPQVYTLPPSREEMTKNQVSL(T)                            | H313-371 |
| 6907.606  | (L)TVLHQDWLNGKEYKCKVSNKALPAPIEKTISKA<br>KGQPREPQVYTLPPSREEMTKNQVSLTC(L)                          | H313-373 |
| 7020.69   | (L)TVLHQDWLNGKEYKCKVSNKALPAPIEKTISKA<br>KGQPREPQVYTLPPSREEMTKNQVSLTCL(V)                         | H313-374 |
| 7914.1183 | (L)TVLHQDWLNGKEYKCKVSNKALPAPIEKTISKA<br>KGQPREPQVYTLPPSREEMTKNQVSLTCLVKGFY<br>PSD(I)             | H313-382 |
| 1229.5871 | (L)TCLVKGFYPSD(I)                                                                                | H372-382 |
| 1025.5302 | (C)LVKGFYPSD(I)                                                                                  | H374-382 |
| 4100.94   | (C)LVKGFYPSDIAVEWESNGQPENNYKTTPVLDS<br>SDGSF(F)                                                  | H374-410 |
| 912.4462  | (L)VKGFYPSD(I)                                                                                   | H375-382 |
| 3987.8559 | (L)VKGFYPSDIAVEWESNGQPENNYKTTPVLDS<br>DGSF(F)                                                    | H375-410 |
| 2486.2198 | (D)IAVEWESNGQPENNYKTTPVL(D)                                                                      | H383-404 |
| 3094.4276 | (D)IAVEWESNGQPENNYKTTPVLDS(DGSF(F))                                                              | H383-410 |
| 2316.2135 | (F)FLYSKLTVDKSRWQQGNV(S)                                                                         | H411-429 |
| 4823.3821 | (F)FLYSKLTVDKSRWQQGNV(FSCSVMHEALHNH<br>YTQKSLSLSPG(K))                                           | H411-452 |
| 4563.2296 | (L)YSKLTVDKSRWQQGNV(FSCSVMHEALHNHYT<br>QKSLSLSPG(K))                                             | H413-452 |

|           |                                                |          |
|-----------|------------------------------------------------|----------|
| 4071.9552 | (L)TVDKSRWQQGNVFSCSVMHEALHNHYTQKSL<br>SLSPG(K) | H417-452 |
| 2526.1864 | (F)SCSVMHEALHNHYTQKSLSLSPG(K)                  | H430-452 |

\*6705.1942 is the monoisotopic mass for H268-312 with G0F glycosylation.

\*\*6867.244 is the monoisotopic mass for H268-312 with G1F glycosylation.

\*\*\*5725.726 is the monoisotopic mass for H277-312 with G0F glycosylation.

**Table S-6.** Light- and heavy-chain peptides identified from a spin-membrane (spun at 500 g) peptic digest of **Rituxan**.

| m/z of [M+H] <sup>+</sup> | Peptide Sequence                                                                         | Amino Acids |
|---------------------------|------------------------------------------------------------------------------------------|-------------|
| 5763.9302                 | (-)QIVLSQSPAILSASPGEKVTMTCRASSSVSYIH<br>WFQQKPGSSPKPWIYATSNL(A)                          | L1-53       |
| 4614.2544                 | (L)SASPGEKVTMTCRASSSVSYIHWFQQKPGSSP<br>KPWIYATSNL(A)                                     | L12-53      |
| 7654.7282                 | (L)SASPGEKVTMTCRASSSVSYIHWFQQKPGSSP<br>KPWIYATSNLASGVPVRFSGSGSGTSSYSLTISRVE<br>AEDAAT(Y) | L12-84      |
| 3626.7849                 | (M)TCRASSSVSYIHWFQQKPGSSPKPWIYATSNL<br>(A)                                               | L22-53      |
| 2585.33                   | (Y)IHWFQQKPGSSPKPWIYATSNL(A)                                                             | L32-53      |
| 3059.4916                 | (L)ASGVPVRFSGSGSGTSSYSLTISRVEAEDAA<br>T(Y)                                               | L54-84      |
| 3222.5549                 | (L)ASGVPVRFSGSGSGTSSYSLTISRVEAEDAAT<br>Y(Y)                                              | L54-85      |
| 1161.5746                 | (T)ISRVEAEDAAT(Y)                                                                        | L74-84      |
| 2147.9855                 | (T)YYCQQWTSNPPTFGGGTKL(E)                                                                | L85-103     |
| 3446.7202                 | (T)YYCQQWTSNPPTFGGGTKLEIKRTVAAPSVF(I)                                                    | L85-115     |
| 5103.5561                 | (T)YYCQQWTSNPPTFGGGTKLEIKRTVAAPSVFIF<br>PPSDEQLKSGTASV(V)                                | L85-131     |
| 5418.7177                 | (T)YYCQQWTSNPPTFGGGTKLEIKRTVAAPSVFIF<br>PPSDEQLKSGTASVVCL(L)                             | L85-134     |
| 3283.6568                 | (Y)YCQQWTSNPPTFGGGTKLEIKRTVAAPSVF(I)                                                     | L86-115     |
| 5255.6544                 | (Y)YCQQWTSNPPTFGGGTKLEIKRTVAAPSVFIFP<br>PSDEQLKSGTASVVCL(L)                              | L86-134     |
| 2614.3988                 | (Q)WTSNPPTFGGGTKLEIKRTVAAPSV(F)                                                          | L90-114     |
| 2761.4672                 | (Q)WTSNPPTFGGGTKLEIKRTVAAPSVF(I)                                                         | L90-115     |
| 4733.4647                 | (Q)WTSNPPTFGGGTKLEIKRTVAAPSVFIFPPSDE<br>QLKSGTASVVCL(L)                                  | L90-134     |
| 1170.6841                 | (L)EIKRTVAAPSV(F)                                                                        | L104-114    |

|            |                                                                                                             |          |
|------------|-------------------------------------------------------------------------------------------------------------|----------|
| 1317.7525  | (L)EIKRTVAAPSVF(I)                                                                                          | L104-115 |
| 2974.5884  | (L)EIKRTVAAPSVFIFPPSDEQLKSGTASV(V)                                                                          | L104-131 |
| 3289.7501  | (L)EIKRTVAAPSVFIFPPSDEQLKSGTASVVCL(L)                                                                       | L104-134 |
| 1822.9222  | (V)FIFPPSDEQLKSGTASV(V)                                                                                     | L115-131 |
| 2138.0838  | (V)FIFPPSDEQLKSGTASVVCL(L)                                                                                  | L115-134 |
| 1675.8537  | (F)IFPPSDEQLKSGTASV(V)                                                                                      | L116-131 |
| 1991.0154  | (F)IFPPSDEQLKSGTASVVCL(L)                                                                                   | L116-134 |
| 9173.4266  | (V)VCLLNNFYPREAKVQWKVDNALQSGNSQESV<br>TEQDSKDSTYSLSSTLTLSKADYEKHKVYACEVT<br>HQGLSSPVTKSFNRGEC(-)            | L132-213 |
| 6830.2803  | (L)LNNFYPREAKVQWKVDNALQSGNSQESVTEQ<br>DSKDSTYSLSSTLTLSKADYEKHKVYACE(V)                                      | L135-194 |
| 8858.265   | (L)LNNFYPREAKVQWKVDNALQSGNSQESVTEQ<br>DSKDSTYSLSSTLTLSKADYEKHKVYACEVTHQG<br>LSSPVTKSFNRGEC(-)               | L135-213 |
| 2047.0025  | (E)VTHQGLSSPVTKSFNRGEC(-)                                                                                   | L195-213 |
| 5393.702   | (-)QVQLQQPGAELVKPGASVKMSCKASGYTFTSY<br>NMHWVKQTPGRGLEWIG(A)                                                 | H1-49    |
| 7647.8403  | (-)QVQLQQPGAELVKPGASVKMSCKASGYTFTSY<br>NMHWVKQTPGRGLEWIGAIYPGNGDTSYNQKFK<br>GKATL(T)                        | H1-70    |
| 8659.2912  | (-)QVQLQQPGAELVKPGASVKMSCKASGYTFTSY<br>NMHWVKQTPGRGLEWIGAIYPGNGDTSYNQKFK<br>GKATLTADKSSSTAY(M)              | H1-80    |
| 9031.4743  | (-)QVQLQQPGAELVKPGASVKMSCKASGYTFTSY<br>NMHWVKQTPGRGLEWIGAIYPGNGDTSYNQKFK<br>GKATLTADKSSSTAYMQL(S)           | H1-83    |
| 9318.6224  | (-)QVQLQQPGAELVKPGASVKMSCKASGYTFTSY<br>NMHWVKQTPGRGLEWIGAIYPGNGDTSYNQKFK<br>GKATLTADKSSSTAYMQLSSL(T)        | H1-86    |
| 10007.9092 | (-)QVQLQQPGAELVKPGASVKMSCKASGYTFTSY<br>NMHWVKQTPGRGLEWIGAIYPGNGDTSYNQKFK<br>GKATLTADKSSSTAYMQLSSLTSEDSAV(Y) | H1-93    |
| 1974.0187  | (E)LVKPGASVKMSCKASGYTF(T)                                                                                   | H11-29   |
| 4315.1613  | (E)LVKPGASVKMSCKASGYTFTSYNMHWVKQTP<br>GRGLEWIG(A)                                                           | H11-49   |
| 6569.2996  | (E)LVKPGASVKMSCKASGYTFTSYNMHWVKQTP<br>GRGLEWIGAIYPGNGDTSYNQKFKGKATL(T)                                      | H11-70   |
| 7952.9336  | (E)LVKPGASVKMSCKASGYTFTSYNMHWVKQTP<br>GRGLEWIGAIYPGNGDTSYNQKFKGKATLTADKS<br>SSTAYMQL(S)                     | H11-83   |
| 8240.0817  | (E)LVKPGASVKMSCKASGYTFTSYNMHWVKQTP<br>GRGLEWIGAIYPGNGDTSYNQKFKGKATLTADKS<br>SSTAYMQLSSL(T)                  | H11-86   |
| 5997.9327  | (F)TSYNMHWWVKQTPGRGLEWIGAIYPGNGDTSY<br>NQKFKGKATLTADKSSSTAYMQL(S)                                           | H30-83   |

|           |                                                                                                  |          |
|-----------|--------------------------------------------------------------------------------------------------|----------|
| 3656.7901 | (G)AIYPGNGDTSYNQKFKGKATLTADKSSSTAYM<br>QL(S)                                                     | H50-83   |
| 995.4528  | (L)SSLTSEDSAV(Y)                                                                                 | H84-93   |
| 1418.5681 | (V)YYCARSTYYGGD(W)                                                                               | H94-105  |
| 4332.1645 | (D)WYFNWVGAGTTVTVSAASTKGPSVFPLAPSS<br>KSTSGGTAALGCL(V)                                           | H106-149 |
| 1194.6041 | (L)VKDYFPEPVT(V)                                                                                 | H150-159 |
| 3118.5884 | (L)VKDYFPEPVTVSWNSGALTSGVHTFPAVL(Q)                                                              | H150-178 |
| 3590.8166 | (L)VKDYFPEPVTVSWNSGALTSGVHTFPAVLQSS<br>GL(Y)                                                     | H150-183 |
| 1943.0021 | (T)VSWNSGALTSGVHTFPAVL(Q)                                                                        | H160-178 |
| 1812.9226 | (L)YSLSSVVTVPSSSLGTQT(Y)                                                                         | H184-201 |
| 5886.8809 | (L)YSLSSVVTVPSSSLGTQTYICNVNHKPSNTKVD<br>KKAEPKSCDKTHTCPPCPAPEL(L)                                | H184-238 |
| 6397.1611 | (L)YSLSSVVTVPSSSLGTQTYICNVNHKPSNTKVD<br>KKAEPKSCDKTHTCPPCPAPELLGGPSV(F)                          | H184-244 |
| 6544.2295 | (L)YSLSSVVTVPSSSLGTQTYICNVNHKPSNTKVD<br>KKAEPKSCDKTHTCPPCPAPELLGGPSVF(L)                         | H184-245 |
| 7811.9294 | (L)YSLSSVVTVPSSSLGTQTYICNVNHKPSNTKVD<br>KKAEPKSCDKTHTCPPCPAPELLGGPSVFLFPPK<br>PKDTLM(I)          | H184-256 |
| 8798.4149 | (L)YSLSSVVTVPSSSLGTQTYICNVNHKPSNTKVD<br>KKAEPKSCDKTHTCPPCPAPELLGGPSVFLFPPK<br>PKDTLMISRTPEVTC(V) | H184-265 |
| 4092.9762 | (T)YICNVNHKPSNTKVDKKAEPKSCDKTHTCPPC<br>PAPEL(L)                                                  | H202-238 |
| 4750.3248 | (T)YICNVNHKPSNTKVDKKAEPKSCDKTHTCPPC<br>PAPELLGGPSVF(L)                                           | H202-245 |
| 6018.0247 | (T)YICNVNHKPSNTKVDKKAEPKSCDKTHTCPPC<br>PAPELLGGPSVFLFPPKPKDTLM(I)                                | H202-256 |
| 1944.0663 | (L)LGGPSVFLFPPKPKDTLM(I)                                                                         | H239-256 |
| 2930.5518 | (L)LGGPSVFLFPPKPKDTLMISRTPEVTC(V)                                                                | H239-265 |
| 1433.7861 | (V)FLFPPKPKDTLM(I)                                                                               | H245-256 |
| 1286.7177 | (F)LFPPKPKDTLM(I)                                                                                | H246-256 |
| 2273.2032 | (F)LFPPKPKDTLMISRTPEVTC(V)                                                                       | H246-265 |
| 1005.5034 | (M)ISRTPEVTC(V)                                                                                  | H257-265 |
| 1104.5718 | (M)ISRTPEVTCV(V)                                                                                 | H257-266 |
| 1898.9283 | (C)VVDVSHEDPEVKFNW(Y)                                                                            | H266-281 |
| 3721.8609 | (C)VVDVSHEDPEVKFNWYVDGVEVHNAKTKPR<br>E(E)                                                        | H266-297 |
| 6705.1660 | (C)VVDVSHEDPEVKFNWYVDGVEVHNAKTKPR<br>EEQYNSTYRVVSVL(T)*                                          | H266-310 |
| 6867.2164 | (C)VVDVSHEDPEVKFNWYVDGVEVHNAKTKPR<br>EEQYNSTYRVVSVL(T)**                                         | H266-310 |

|           |                                                                              |          |
|-----------|------------------------------------------------------------------------------|----------|
| 7029.2668 | (C)VVVDVSHEDPEVKFNWYVDGVEVHNAKTKPREEQYNSTYRVVSVL(T)***                       | H266-310 |
| 6671.577  | (L)TVLHQDWLNGKEYKCKVSNKALPAPIEKTISKAKGQPREPQVYTLPPSRDELTKNQVSL(T)            | H311-369 |
| 6988.718  | (L)TVLHQDWLNGKEYKCKVSNKALPAPIEKTISKAKGQPREPQVYTLPPSRDELTKNQVSLTCL(V)         | H311-372 |
| 7882.1463 | (L)TVLHQDWLNGKEYKCKVSNKALPAPIEKTISKAKGQPREPQVYTLPPSRDELTKNQVSLTCLVKGFYPSD(I) | H311-380 |
| 912.4462  | (L)VKGFYPSD(I)                                                               | H373-380 |
| 1025.5302 | (L)VKGFYPSDI(A)                                                              | H373-381 |
| 3987.8559 | (L)VKGFYPSDIAVEWESNGQPENNYKTTPVLDS DGSF(F)                                   | H373-408 |
| 2486.2198 | (D)IAVEWESNGQPENNYKTTPVL(D)                                                  | H381-402 |
| 3094.4276 | (D)IAVEWESNGQPENNYKTTPVLDS DGSF(F)                                           | H381-408 |
| 2316.2135 | (F)FLYSKLTVDKSRWQQGNVF(S)                                                    | H409-427 |
| 4823.3821 | (F)FLYSKLTVDKSRWQQGNVFSCSVMHEALHNH YTKSLSLSPG(K)                             | H409-450 |
| 4563.2296 | (L)YSKLTVDKSRWQQGNVFSCSVMHEALHNHYT QKSLSLSPG(K)                              | H411-450 |
| 4071.9552 | (L)TVDKSRWQQGNVFSCSVMHEALHNHYTQKSL SLSPG(K)                                  | H415-450 |
| 2526.1864 | (F)SCSVMHEALHNHYTQKSLSLSPG(K)                                                | H428-450 |

\*6705.1660 is the monoisotopic mass for H266-310 with G0F glycosylation.

\*\*6867.2164 is the monoisotopic mass for H266-310 with G1F glycosylation.

\*\*\*7029.2668 is the monoisotopic mass for H266-310 with G2F glycosylation.

**Table S-7.** Light- and heavy-chain peptides identified from a spin-membrane (spun at 500 g) peptic digest of **Vectibix**.

| m/z of [M+H] <sup>+</sup> | Peptide Sequence                                               | Amino Acids |
|---------------------------|----------------------------------------------------------------|-------------|
| 1206.5671                 | (-)DIQMTQSPSSL(S)                                              | L1-11       |
| 2524.2018                 | (-)DIQMTQSPSSLSASVGDRVTITCQ(A)                                 | L1-24       |
| 3239.5155                 | (-)DIQMTQSPSSLSASVGDRVTITCQASQDISN(Y)                          | L1-31       |
| 5054.4986                 | (-)DIQMTQSPSSLSASVGDRVTITCQASQDISNYL NWFYQQKPGKAPKL(L)         | L1-46       |
| 5830.8691                 | (-)DIQMTQSPSSLSASVGDRVTITCQASQDISNYL NWFYQQKPGKAPKLLIYDASN(L)  | L1-53       |
| 5943.9532                 | (-)DIQMTQSPSSLSASVGDRVTITCQASQDISNYL NWFYQQKPGKAPKLLIYDASNL(E) | L1-54       |

|           |                                                                                                     |          |
|-----------|-----------------------------------------------------------------------------------------------------|----------|
| 9116.4368 | (-)DIQMTQSPSSLSASVGDRVITITCQASQDISNYL<br>NWYQQKPGKAPKLLIYDASNLETGVPSRFGSGS<br>GTDFTFTISSLQPEDIAT(Y) | L1-85    |
| 1336.6525 | (L)SASVGDRVITITCQ(A)                                                                                | L12-24   |
| 2051.9662 | (L)SASVGDRVITITCQASQDISN(Y)                                                                         | L12-31   |
| 4643.3199 | (L)SASVGDRVITITCQASQDISNYLNWYQQKPGKA<br>PKLLIYDASN(L)                                               | L12-53   |
| 2549.3147 | (Q)ASQDISNYLNWYQQKPGKAPKL(L)                                                                        | L25-46   |
| 3325.6852 | (Q)ASQDISNYLNWYQQKPGKAPKLLIYDASN(L)                                                                 | L25-53   |
| 1834.001  | (N)YLNWYQQKPGKAPKL(L)                                                                               | L32-46   |
| 2723.4555 | (N)YLNWYQQKPGKAPKLLIYDASN(L)                                                                        | L32-54   |
| 3288.6986 | (T)YFCQHFDHLPLAFGGGTKVEIKRTVAAPSV(F)                                                                | L86-115  |
| 3435.7671 | (T)YFCQHFDHLPLAFGGGTKVEIKRTVAAPSVF(I)                                                               | L86-116  |
| 5092.603  | (T)YFCQHFDHLPLAFGGGTKVEIKRTVAAPSVFIFP<br>PSDEQLKSGTASV(V)                                           | L86-132  |
| 5407.7646 | (T)YFCQHFDHLPLAFGGGTKVEIKRTVAAPSVFIFP<br>PSDEQLKSGTASVVCL(L)                                        | L86-135  |
| 3125.6353 | (Y)FCQHFDHLPLAFGGGTKVEIKRTVAAPSV(F)                                                                 | L87-115  |
| 3272.7037 | (Y)FCQHFDHLPLAFGGGTKVEIKRTVAAPSVF(I)                                                                | L87-116  |
| 1822.9222 | (V)FIFPPSDEQLKSGTASV(V)                                                                             | L116-132 |
| 2138.0838 | (V)FIFPPSDEQLKSGTASVVCL(L)                                                                          | L116-135 |
| 1675.8537 | (F)IFPPSDEQLKSGTASV(V)                                                                              | L117-132 |
| 1991.0154 | (F)IFPPSDEQLKSGTASVVCL(L)                                                                           | L117-135 |
| 1877.9313 | (I)FPPSDEQLKSGTASVVCL(L)                                                                            | L118-135 |
| 9173.4266 | (V)VCLLNNFYPREAKVQWKVDNALQSGNSQESVT<br>EQDSKDSTYLSSTLTLSKADYEEKHKVYACEVTHQ<br>GLSSPVTKSFNRGEC(-)    | L133-214 |
| 6830.2803 | (L)LNNFYPREAKVQWKVDNALQSGNSQESVTEQD<br>SKDSTYLSSTLTLSKADYEEKHKVYACE(V)                              | L136-195 |
| 8858.265  | (L)LNNFYPREAKVQWKVDNALQSGNSQESVTEQD<br>SKDSTYLSSTLTLSKADYEEKHKVYACEVTHQGLS<br>SPVTKSFNRGEC(-)       | L136-214 |
| 2047.0025 | (E)VTHQGLSSPVTKSFNRGEC(-)                                                                           | L196-214 |
| 2093.1114 | (-)QVQLQESGGLVKPSETLSL(T)                                                                           | H1-20    |
| 1641.8694 | (L)QESGGLVKPSETLSL(T)                                                                               | H5-20    |
| 5485.6335 | (L)TCTVSGGSVSSGDYYWTWIRQSPGKGLEWIGH<br>IYYSGNTNYPNLSLKSRL(T)                                        | H21-69   |
| 1240.642  | (L)TISIDTSKTQF(S)                                                                                   | H70-80   |
| 1702.8898 | (F)SLKLSSVTAADTAIYY(C)                                                                              | H81-96   |
| 1123.5677 | (Y)CVRDRVTGAF(D)                                                                                    | H97-106  |
| 2011.9477 | (Y)CVRDRVTGAFDIWGQGM(V)                                                                             | H97-114  |
| 2683.3243 | (M)VTVSSASTKGPSVFPLAPCSRSTSEST(A)                                                                   | H115-141 |
| 3211.5973 | (M)VTVSSASTKGPSVFPLAPCSRSTSESTAAALGCL<br>(V)                                                        | H115-147 |
| 1194.6041 | (L)VKDYFPEPVT(V)                                                                                    | H148-157 |

|           |                                                                                    |          |
|-----------|------------------------------------------------------------------------------------|----------|
| 3118.5884 | (L)VKDYFPEPVTVSWNSGALTSGVHTFPAVL(Q)                                                | H148-176 |
| 3590.8166 | (L)VKDYFPEPVTVSWNSGALTSGVHTFPAVLQSS<br>GL(Y)                                       | H148-181 |
| 2938.4945 | (F)PEPVTVSWNSGALTSGVHTFPAVLQSSGL(Y)                                                | H153-181 |
| 1873.9178 | (L)YSLSSVVTVPSSNFGTQT(Y)                                                           | H182-199 |
| 6023.8745 | (L)YSLSSVVTVPSSNFGTQTYTCNVDHKPSNTKVD<br>KTVERKCCVECPCPAPPVAGPSV(F)                 | H182-238 |
| 6170.9429 | (L)YSLSSVVTVPSSNFGTQTYTCNVDHKPSNTKVD<br>KTVERKCCVECPCPAPPVAGPSVF(L)                | H182-239 |
| 7307.6023 | (L)YSLSSVVTVPSSNFGTQTYTCNVDHKPSNTKVD<br>KTVERKCCVECPCPAPPVAGPSVFLFPPKPKDTL<br>(M)  | H182-249 |
| 7438.6427 | (L)YSLSSVVTVPSSNFGTQTYTCNVDHKPSNTKVD<br>KTVERKCCVECPCPAPPVAGPSVFLFPPKPKDTL<br>M(I) | H182-250 |
| 4703.2183 | (F)GTQTYTCNVDHKPSNTKVDKTVERKCCVECPCP<br>APPVAGPSVF(L)                              | H196-239 |
| 5970.9182 | (F)GTQTYTCNVDHKPSNTKVDKTVERKCCVECPCP<br>APPVAGPSVFLFPPKPKDTLM(I)                   | H196-250 |
| 4168.9745 | (T)YTCNVDHKPSNTKVDKTVERKCCVECPCPAP<br>PVAGPSV(F)                                   | H200-238 |
| 4316.0429 | (T)YTCNVDHKPSNTKVDKTVERKCCVECPCPAP<br>PVAGPSVF(L)                                  | H200-239 |
| 5583.7428 | (T)YTCNVDHKPSNTKVDKTVERKCCVECPCPAP<br>PVAGPSVFLFPPKPKDTLM(I)                       | H200-250 |
| 3948.9227 | (C)NVDHKPSNTKVDKTVERKCCVECPCPAPPVA<br>GPSVF(L)                                     | H203-239 |
| 5216.6226 | (C)NVDHKPSNTKVDKTVERKCCVECPCPAPPVA<br>GPSVFLFPPKPKDTLM(I)                          | H203-250 |
| 1433.7861 | (V)FLFPPKPKDTLM(I)                                                                 | H239-250 |
| 1286.7177 | (F)LFPPKPKDTLM(I)                                                                  | H240-250 |
| 2273.2032 | (F)LFPPKPKDTLMISRTPEVTC(V)                                                         | H240-259 |
| 1173.6336 | (L)FPPKPKDTLM(I)                                                                   | H241-250 |
| 1136.5438 | (L)MISRTPEVTC(V)                                                                   | H250-259 |
| 1005.5034 | (M)ISRTPEVTC(V)                                                                    | H251-259 |
| 1598.7697 | (C)VVDVSHEDPEVQF(N)                                                                | H260-273 |
| 1898.8919 | (C)VVDVSHEDPEVQFNW(Y)                                                              | H260-275 |
| 6019.7183 | (C)VVDVSHEDPEVQFNWYVDGVEVHNAKTKPR<br>EEQFNSTF(R)*                                  | H260-298 |
| 6181.7644 | (C)VVDVSHEDPEVQFNWYVDGVEVHNAKTKPR<br>EEQFNSTF(R)**                                 | H260-298 |
| 6673.1343 | (C)VVDVSHEDPEVQFNWYVDGVEVHNAKTKPR<br>EEQFNSTFRVSVL(T)***                           | H260-304 |
| 6835.1836 | (C)VVDVSHEDPEVQFNWYVDGVEVHNAKTKPR<br>EEQFNSTFRVSVL(T)****                          | H260-304 |



|           |                                                                      |          |
|-----------|----------------------------------------------------------------------|----------|
| 4139.8438 | (W)YVDGVEVHNAKTKPREEQFNSTF(R)*****                                   | H276-298 |
| 4301.8954 | (W)YVDGVEVHNAKTKPREEQFNSTF(R)*****                                   | H276-298 |
| 4793.2674 | (W)YVDGVEVHNAKTKPREEQFNSTFRVSVL(T)**<br>*****                        | H276-304 |
| 4955.3153 | (W)YVDGVEVHNAKTKPREEQFNSTFRVSVL(T)**<br>*****                        | H276-304 |
| 6705.5284 | (L)TVVHQDWLNGKEYKCKVSNKGLPAPIEKTISKTKGQPREPQVYTLPPSREEMTKNQVSL(T)    | H305-363 |
| 6909.5852 | (L)TVVHQDWLNGKEYKCKVSNKGLPAPIEKTISKTKGQPREPQVYTLPPSREEMTKNQVSLTC(L)  | H305-365 |
| 7022.6693 | (L)TVVHQDWLNGKEYKCKVSNKGLPAPIEKTISKTKGQPREPQVYTLPPSREEMTKNQVSLTCL(V) | H305-366 |
| 1229.5871 | (L)TCLVKGFYPSD(I)                                                    | H364-374 |
| 1025.5302 | (C)LVKGFYPSD(I)                                                      | H366-374 |
| 912.4462  | (L)VKGFYPSD(I)                                                       | H367-374 |
| 2518.1919 | (D)IAVEWESNGQPENNYKTTPML(D)                                          | H375-396 |
| 3126.3997 | (D)IAVEWESNGQPENNYKTTPMLDSDGSF(F)                                    | H375-402 |
| 2316.2135 | (F)FLYSKLTVDKSRWQQGNVF(S)                                            | H403-421 |
| 2506.2547 | (F)FLYSKLTVDKSRWQQGNVFSC(S)                                          | H403-423 |
| 4823.3821 | (F)FLYSKLTVDKSRWQQGNVFSCSVMHEALHNHYTQKSLSLSPG(K)                     | H403-444 |
| 2056.061  | (L)YSKLTVDKSRWQQGNVF(S)                                              | H405-421 |
| 4563.2296 | (L)YSKLTVDKSRWQQGNVFSCSVMHEALHNHYTQKSLSLSPG(K)                       | H405-444 |
| 4071.9552 | (L)TVDKSRWQQGNVFSCSVMHEALHNHYTQKSLSLSPG(K)                           | H409-444 |
| 2526.1864 | (F)SCSVMHEALHNHYTQKSLSLSPG(K)                                        | H422-444 |
| 2336.1452 | (C)SVMHEALHNHYTQKSLSLSPG(K)                                          | H424-444 |

\*6019.7183 is the monoisotopic mass for H260-298 with G0F glycosylation.

\*\*6181.7644 is the monoisotopic mass for H260-298 with G1F glycosylation.

\*\*\*6673.1343 is the monoisotopic mass for H260-304 with G0F glycosylation.

\*\*\*\*6835.1836 is the monoisotopic mass for H260-304 with G1F glycosylation.

\*\*\*\*\*4139.8438 is the monoisotopic mass for H276-298 with G0F glycosylation.

\*\*\*\*\*4301.8954 is the monoisotopic mass for H276-298 with G1F glycosylation.

\*\*\*\*\*4793.2674 is the monoisotopic mass for H276-304 with G0F glycosylation.

\*\*\*\*\*4955.3153 is the monoisotopic mass for H276-304 with G1F glycosylation.

**Table S-8.** Yields of peptides from spin-membrane and in-solution digestion as determined using tryptophan fluorescence.

|                             | Avastin (%) | Rituxumab (%) |
|-----------------------------|-------------|---------------|
| Pepsin spin membrane        | 80 ± 16     | 88 ± 5        |
| Trypsin spin membrane       | 60 ± 8      | 61 ± 9        |
| Pepsin in-solution digests  | 65 ± 1      | 69 ± 2        |
| Trypsin in-solution digests | 37 ± 1      | 24 ± 2        |

**Table S-9.** Light- and heavy-chain peptides identified from a spin-membrane (spun at 500 g) tryptic digest of **Herceptin**.

| m/z of [M+H] <sup>+</sup> | Peptide Sequence                                                                                                                                                                | Amino Acids | Missed cleavages |
|---------------------------|---------------------------------------------------------------------------------------------------------------------------------------------------------------------------------|-------------|------------------|
| 2609.2658                 | (-) <b>DIQMTQSPSSLSASVGDRVITIC</b> (Carbamido methyl) <b>R(A)</b>                                                                                                               | L1-24       | 1                |
| 7165.6262                 | (-) <b>DIQMTQSPSSLSASVGDRVITIC</b> (Carbamido methyl) <b>RASQDVNTAVAWYQQKPGKAPKLLIYSASFLYSGVPSRFSGSR(S)</b>                                                                     | L1-66       | 5                |
| 11959.9174                | (-) <b>DIQMTQSPSSLSASVGDRVITIC</b> (Carbamido methyl) <b>RASQDVNTAVAWYQQKPGKAPKLLIYSASFLYSGVPSRFSGSRSGTDFTLTISSLQPEDFATYYC</b> (Carbamidomethyl) <b>QQHYTTPPTFGQGTKVEIKR(T)</b> | L1-108      | 8                |
| 2287.183                  | <b>(R)ASQDVNTAVAWYQQKPGKAPK(L)</b>                                                                                                                                              | L25-45      | 1                |
| 4575.3783                 | <b>(R)ASQDVNTAVAWYQQKPGKAPKLLIYSASFLYSGVPSRFSGSR(S)</b>                                                                                                                         | L25-66      | 3                |
| 9369.6695                 | <b>(R)ASQDVNTAVAWYQQKPGKAPKLLIYSASFLYSGVPSRFSGSRSGTDFTLTISSLQPEDFATYYC</b> (Carbamido methyl) <b>QQHYTTPPTFGQGTKVEIKR(T)</b>                                                    | L25-108     | 6                |
| 1772.9581                 | <b>(K)LLIYSASFLYSGVPSR(F)</b>                                                                                                                                                   | L46-61      | 0                |
| 2307.2132                 | <b>(K)LLIYSASFLYSGVPSRFSGSR(S)</b>                                                                                                                                              | L46-66      | 1                |
| 4657.2079                 | <b>(R)SGTDFTLTISSLQPEDFATYYC</b> (Carbamidomethyl) <b>QQHYTTPPTFGQGTKVEIK(R)</b>                                                                                                | L67-107     | 1                |

|            |                                                                                                                                                                  |          |    |
|------------|------------------------------------------------------------------------------------------------------------------------------------------------------------------|----------|----|
| 4813.309   | (R)SGTDFTLTISSLQPEDFATYYC(Carbamidomethyl)QQHYTTPPTFGQG TKVEIKR(T)                                                                                               | L67-108  | 2  |
| 7336.7223  | (K)VEIKRTVAAPSVFIFPPSDEQLKSGTASVVC(Carbamidomethyl)LLNNFYPREAKVQWKVDNALQSGNSQESVTEQDSK(D)                                                                        | L104-169 | 6  |
| 3881.0055  | (K)RTVAAPSVFIFPPSDEQLKSGTASVVC(Carbamidomethyl)LLNNFYPR(E)                                                                                                       | L108-142 | 2  |
| 4209.1801  | (K)RTVAAPSVFIFPPSDEQLKSGTASVVC(Carbamidomethyl)LLNNFYPREAK(V)                                                                                                    | L108-145 | 3  |
| 1946.027   | (R)TVAAPSVFIFPPSDEQLK(S)                                                                                                                                         | L109-126 | 0  |
| 3724.9043  | (R)TVAAPSVFIFPPSDEQLKSGTASVVC(Carbamidomethyl)LLNNFYPR(E)                                                                                                        | L109-142 | 1  |
| 4053.079   | (R)TVAAPSVFIFPPSDEQLKSGTASVVC(Carbamidomethyl)LLNNFYPREAK(V)                                                                                                     | L109-145 | 2  |
| 4594.3803  | (R)TVAAPSVFIFPPSDEQLKSGTASVVC(Carbamidomethyl)LLNNFYPREAKVQWK(V)                                                                                                 | L109-149 | 3  |
| 10923.3997 | (R)TVAAPSVFIFPPSDEQLKSGTASVVC(Carbamidomethyl)LLNNFYPREAKVQWKVDNALQSGNSQESVTEQDSKDYSLSTLTLSKADYEKHKVYAC(Carbamidomethyl)EVTHQGLSSPVTK(S)                         | L109-207 | 8  |
| 11773.7389 | (R)TVAAPSVFIFPPSDEQLKSGTASVVC(Carbamidomethyl)LLNNFYPREAKVQWKVDNALQSGNSQESVTEQDSKDYSLSTLTLSKADYEKHKVYAC(Carbamidomethyl)EVTHQGLSSPVTKSFNRGEC(Carbamidomethyl)(-) | L109-214 | 10 |
| 2126.0699  | (K)SGTASVVC(Carbamidomethyl)LLNNFYPREAK(V)                                                                                                                       | L127-145 | 1  |
| 7739.6777  | (K)VQWKVDNALQSGNSQESVTEQDSKDYSLSTLTLSKADYEKHKVYAC(Carbamidomethyl)EVTHQGLSSPVTKSFNRGEC(Carbamidomethyl)(-)                                                       | L146-214 | 7  |
| 1502.7584  | (K)DYSLSTLTLSK(A)                                                                                                                                                | L170-183 | 0  |
| 2747.3457  | (K)ADYEKHKVYAC(Carbamidomethyl)EVTHQGLSSPVTK(S)                                                                                                                  | L184-207 | 2  |

|           |                                                                                                                              |          |   |
|-----------|------------------------------------------------------------------------------------------------------------------------------|----------|---|
| 3597.6849 | (K)ADYEKHKVYAC(Carbamidomethyl)EVTHQGLSSPVTKSFNRGEC(Carbamidomethyl)(-)                                                      | L184-214 | 4 |
| 2141.0808 | (K)HKVYAC(Carbamidomethyl)EVTHQGLSSPVTK(S)                                                                                   | L189-207 | 1 |
| 1875.9269 | (K)VYAC(Carbamidomethyl)EVTHQGLSSPVTK(S)                                                                                     | L191-207 | 0 |
| 2726.2661 | (K)VYAC(Carbamidomethyl)EVTHQGLSSPVTKSFNRGEC(Carbamidomethyl)(-)                                                             | L191-214 | 2 |
| 1882.0029 | (-)EVQLVESGGGLVQPGGSLR(L)                                                                                                    | H1-19    | 0 |
| 4101.0975 | (-)EVQLVESGGGLVQPGGSLRLSC(Carbamidomethyl)AASGFNIKDTYIHWVR(Q)                                                                | H1-38    | 2 |
| 5393.7964 | (-)EVQLVESGGGLVQPGGSLRLSC(Carbamidomethyl)AASGFNIKDTYIHWVRQAPGKGLEWVAR(I)                                                    | H1-50    | 4 |
| 6459.3208 | (-)EVQLVESGGGLVQPGGSLRLSC(Carbamidomethyl)AASGFNIKDTYIHWVRQAPGKLEWVARIYPTNGYTR(Y)                                            | H1-59    | 5 |
| 2238.1124 | (R)LSC(Carbamidomethyl)AASGFNIKDTYIHWVR(Q)                                                                                   | H20-38   | 1 |
| 3530.8114 | (R)LSC(Carbamidomethyl)AASGFNIKDTYIHWVRQAPGKGLEWVAR(I)                                                                       | H20-50   | 3 |
| 5472.7811 | (R)LSC(Carbamidomethyl)AASGFNIKDTYIHWVRQAPGKLEWVARIYPTNGYTRYADSVKGR(F)                                                       | H20-67   | 6 |
| 1089.5476 | (K)DTYIHWVR(Q)                                                                                                               | H31-38   | 0 |
| 2377.2411 | (R)QAPGKLEWVARIYPTNGYTR(Y)                                                                                                   | H39-59   | 2 |
| 895.4632  | (R)YADSVKGR(F)                                                                                                               | H60-67   | 1 |
| 3576.6734 | (R)FTISADTSKNTAYLQMNSLRAEDTAVYYC(Carbamidomethyl)SR(W)                                                                       | H68-98   | 2 |
| 3951.8898 | (R)WGGDGFYAMDYWGQGTLLVTVSASTKGPSVFPLAPSSK(S)                                                                                 | H99-136  | 1 |
| 1186.6467 | (K)GPSVFPLAPSSK(S)                                                                                                           | H125-136 | 0 |
| 1321.678  | (K)STSGGTAALGC(Carbamidomethyl)LVK(D)                                                                                        | H137-150 | 0 |
| 8939.5187 | (K)STSGGTAALGC(Carbamidomethyl)LVKDYFPEPVTVSWNSGALTSKVHTFPAVLQSSGLYSLSSVTVPSSSLGTQTYIC(Carbamidomethyl)NVNHKPSNTKVDKKVEPK(S) | H137-221 | 4 |

|            |                                                                                                                                                                       |          |   |
|------------|-----------------------------------------------------------------------------------------------------------------------------------------------------------------------|----------|---|
| 7636.8585  | (K)DYFPEPVTVSWNSGALTSGVHT<br>FPAVLQSSGLYLSVVTVPSSSLG<br>TQTYIC(Carbamidomethyl)NVNHKP<br>SNTKVDKKVEPK(S)                                                              | H151-221 | 3 |
| 3334.6421  | (K)SC(Carbamidomethyl)DKTHTC(C<br>arbamidomethyl)PPC(Carbamidomet<br>hyl)PAPELLGGPSVFLFPPKPK(D)                                                                       | H222-251 | 1 |
| 4151.0585  | (K)SC(Carbamidomethyl)DKTHTC(C<br>arbamidomethyl)PPC(Carbamidomet<br>hyl)PAPELLGGPSVFLFPPKPKDTL<br>MISR(T)                                                            | H222-258 | 2 |
| 7929.8522  | (K)SC(Carbamidomethyl)DKTHTC(C<br>arbamidomethyl)PPC(Carbamidomet<br>hyl)PAPELLGGPSVFLFPPKPKDTL<br>MISRTPEVTC(Carbamidomethyl)VV<br>VDVSHEDPEVKFNWYVDGVEVHN<br>AK(T)  | H222-291 | 4 |
| 3797.8116  | (R)TPEVTC(Carbamidomethyl)VVVD<br>VSHEDPEVKFNWYVDGVEVHNAK(<br>T)                                                                                                      | H259-291 | 1 |
| 501.3144   | (K)TKPR(E)                                                                                                                                                            | H292-295 | 0 |
| 2634.238   | (R)EEQYNSTYR(V)*                                                                                                                                                      | H296-304 | 0 |
| 2516.333   | (R)VVSVLTVLHQDWLNGKEYKC(Ca<br>rbamidomethyl)K(V)                                                                                                                      | H305-325 | 2 |
| 1895.1324  | (K)VSNKALPAPIEKTISKAK(G)                                                                                                                                              | H326-343 | 3 |
| 838.5033   | (K)ALPAPIEK(T)                                                                                                                                                        | H330-337 | 0 |
| 1267.762   | (K)ALPAPIEKTISK(A)                                                                                                                                                    | H330-341 | 1 |
| 1466.8941  | (K)ALPAPIEKTISKAK(G)                                                                                                                                                  | H330-343 | 2 |
| 4933.6642  | (K)ALPAPIEKTISKAKGQPREPQVY<br>TLPPSREEMTKNQVSLTC(Carbami<br>domethyl)LVK(G)                                                                                           | H330-373 | 6 |
| 4114.1787  | (K)TISKAKGQPREPQVYTLPPSREE<br>MTKNQVSLTC(Carbamidomethyl)LV<br>K(G)                                                                                                   | H338-373 | 5 |
| 3684.92    | (K)AKGQPREPQVYTLPPSREEMTK<br>NQVSLTC(Carbamidomethyl)LVK(G)                                                                                                           | H342-373 | 4 |
| 2343.1762  | (K)GQPREPQVYTLPPSREEMTK(N)                                                                                                                                            | H344-363 | 2 |
| 3485.7879  | (K)GQPREPQVYTLPPSREEMTKNQ<br>VSLTC(Carbamidomethyl)LVK(G)                                                                                                             | H344-373 | 3 |
| 12088.8484 | (K)GQPREPQVYTLPPSREEMTKNQ<br>VSLTC(Carbamidomethyl)LVKGFP<br>SDIAVEWESNGQPENNYKTTTPVL<br>DSDGSFFLYSKLTVDKSRWQQGNV<br>FSC(Carbamidomethyl)SVMHEALH<br>NHYTQKSLSLSPG(-) | H344-449 | 9 |

|           |                                                                                                                 |          |   |
|-----------|-----------------------------------------------------------------------------------------------------------------|----------|---|
| 3047.554  | (R)EPQVYTLPPSREEMTKNQVSLT<br>C(Carbamidomethyl)LVK(G)                                                           | H348-373 | 2 |
| 1161.6296 | (K)NQVSLTC(Carbamidomethyl)LVK<br>(G)                                                                           | H364-373 | 0 |
| 2544.1314 | (K)GFYPSDIAVEWESNGQPENNYK<br>(T)                                                                                | H374-395 | 0 |
| 4399.0354 | (K)GFYPSDIAVEWESNGQPENNYK<br>TTPPVLDSDGSFFLYSK(L)                                                               | H374-412 | 1 |
| 5198.4906 | (K)GFYPSDIAVEWESNGQPENNYK<br>TTPPVLDSDGSFFLYSKLTVDKSR(<br>W)                                                    | H374-419 | 3 |
| 7980.7398 | (K)GFYPSDIAVEWESNGQPENNYK<br>TTPPVLDSDGSFFLYSKLTVDKSRW<br>QQGNVFSC(Carbamidomethyl)SVM<br>HEALHNHYTQK(S)        | H374-442 | 4 |
| 8622.0783 | (K)GFYPSDIAVEWESNGQPENNYK<br>TTPPVLDSDGSFFLYSKLTVDKSRW<br>QQGNVFSC(Carbamidomethyl)SVM<br>HEALHNHYTQKSLSLSPG(-) | H374-449 | 5 |
| 6096.9647 | (K)TTPPVLDSDGSFFLYSKLTVDKS<br>RWQQGNVFSC(Carbamidomethyl)S<br>VMHEALHNHYTQKSLSLSPG(-)                           | H396-449 | 4 |
| 2801.2671 | (R)WQQGNVFSC(Carbamidomethyl)<br>SVMHEALHNHYTQK(S)                                                              | H420-442 | 0 |
| 3442.6056 | (R)WQQGNVFSC(Carbamidomethyl)<br>SVMHEALHNHYTQKSLSLSPG(-)                                                       | H420-449 | 1 |

\*2634.238 is the monoisotopic mass for H296-304 with G0F glycosylation.

**Table S-10.** Light- and heavy-chain peptides identified from a spin-membrane (spun at 500 g) tryptic digest of **Avastin**.

| m/z of [M+H] <sup>+</sup> | Peptide Sequence                                                                                 | Amino Acids | Missed cleavages |
|---------------------------|--------------------------------------------------------------------------------------------------|-------------|------------------|
| 1878.8862                 | (-)DIQMTQSPSSLSASVGDR(V)                                                                         | L1-18       | 0                |
| 4957.4095                 | (-)DIQMTQSPSSLSASVGDRVTITC(C<br>arbamido<br>methyl)SASQDISNYLNWYQQKPGKA<br>PK(V)                 | L1-45       | 2                |
| 6701.3403                 | (-)DIQMTQSPSSLSASVGDRVTITC(C<br>arbamido<br>methyl)SASQDISNYLNWYQQKPGKA<br>PKVLIYFTSSLHSGVPSR(F) | L1-61       | 3                |

|           |                                                                                                                           |          |   |
|-----------|---------------------------------------------------------------------------------------------------------------------------|----------|---|
| 2801.3563 | (R)VTITC(Carbamidomethyl)SASQDIS<br>NYLNWYQQKPGK(A)                                                                       | L19-42   | 0 |
| 3097.5411 | (R)VTITC(Carbamidomethyl)SASQDIS<br>NYLNWYQQKPGKAPK(V)                                                                    | L19-45   | 1 |
| 1762.9486 | (K)VLIYFTSSLHSGVPSR(F)                                                                                                    | L46-61   | 0 |
| 5285.5048 | (R)FSGSGSGTDFTLTISSLQPEDFAT<br>YYC(Carbamidomethyl)QQYSTVPWT<br>FGQGTKVEIKR(T)                                            | L62-108  | 2 |
| 3881.0055 | (K)RTVAAPSVFIFPPSDEQLKSGTAS<br>VVC(Carbamidomethyl)LLNMFYPR(E)                                                            | L108-142 | 2 |
| 4209.1801 | (K)RTVAAPSVFIFPPSDEQLKSGTAS<br>VVC(Carbamidomethyl)LLNMFYPREA<br>K(V)                                                     | L108-145 | 3 |
| 1946.027  | (R)TVAAPSVFIFPPSDEQLK(S)                                                                                                  | L109-126 | 0 |
| 3724.9043 | (R)TVAAPSVFIFPPSDEQLKSGTASV<br>VC(Carbamidomethyl)LLNMFYPR(E)                                                             | L109-142 | 1 |
| 4053.079  | (R)TVAAPSVFIFPPSDEQLKSGTASV<br>VC(Carbamidomethyl)LLNMFYPREAK<br>(V)                                                      | L109-145 | 2 |
| 4594.3803 | (R)TVAAPSVFIFPPSDEQLKSGTASV<br>VC(Carbamidomethyl)LLNMFYPREAK<br>VQWK(V)                                                  | L109-149 | 3 |
| 1797.8952 | (K)SGTASVVC(Carbamidomethyl)LLN<br>MFYPR(E)                                                                               | L127-142 | 0 |
| 2126.0699 | (K)SGTASVVC(Carbamidomethyl)LLN<br>MFYPREAK(V)                                                                            | L127-145 | 1 |
| 4489.1853 | (R)EAKVQWKVDNALQSGNSQESVT<br>EQDSKDSTYSLSSTLTLSK(A)                                                                       | L143-183 | 3 |
| 7217.5132 | (R)EAKVQWKVDNALQSGNSQESVT<br>EQDSKDSTYSLSSTLTLSKADYEKHK<br>VYAC(Carbamidomethyl)EVTHQGLS<br>SPVTK(S)                      | L143-207 | 6 |
| 4161.0106 | (K)VQWKVDNALQSGNSQESVTEQD<br>SKDSTYSLSSTLTLSK(A)                                                                          | L146-183 | 2 |
| 5032.4294 | (K)VQWKVDNALQSGNSQESVTEQD<br>SKDSTYSLSSTLTLSKADYEKHK(V)                                                                   | L146-190 | 4 |
| 6889.3385 | (K)VQWKVDNALQSGNSQESVTEQD<br>SKDSTYSLSSTLTLSKADYEKHKVYA<br>C(Carbamidomethyl)EVTHQGLSSPV<br>TK(S)                         | L146-207 | 5 |
| 7739.6777 | (K)VQWKVDNALQSGNSQESVTEQD<br>SKDSTYSLSSTLTLSKADYEKHKVYA<br>C(Carbamidomethyl)EVTHQGLSSPV<br>TKSFNRGEC(Carbamidomethyl)(-) | L146-214 | 7 |
| 3619.7093 | (K)VDNALQSGNSQESVTEQDSKDST<br>YSLSSTLTLSK(A)                                                                              | L150-183 | 1 |

|           |                                                                                           |          |   |
|-----------|-------------------------------------------------------------------------------------------|----------|---|
| 6348.0372 | (K)VDNALQSGNSQESVTEQDSKDST<br>YLSSTLTLSKADYEKHKVYAC(Carb<br>amidomethyl)EVTHQGLSSPVT(S)   | L150-207 | 4 |
| 1502.7584 | (K)DSTYLSSTLTLSK(A)                                                                       | L170-183 | 0 |
| 2747.3457 | (K)ADYEKHKVYAC(Carbamidomethyl<br>)EVTHQGLSSPVT(S)                                        | L184-207 | 2 |
| 3597.6849 | (K)ADYEKHKVYAC(Carbamidomethyl<br>)EVTHQGLSSPVT(S)FNRGEC(Carba<br>midomethyl)(-)          | L184-214 | 4 |
| 2141.0808 | (K)HKVYAC(Carbamidomethyl)EVTH<br>QGLSSPVT(S)                                             | L189-207 | 1 |
| 2991.42   | (K)HKVYAC(Carbamidomethyl)EVTH<br>QGLSSPVT(S)FNRGEC(Carbamidom<br>ethyl)(-)               | L189-214 | 3 |
| 1875.9269 | (K)VYAC(Carbamidomethyl)EVTHQG<br>LSSPVT(S)                                               | L191-207 | 0 |
| 2726.2661 | (K)VYAC(Carbamidomethyl)EVTHQG<br>LSSPVT(S)FNRGEC(Carbamidometh<br>yl)(-)                 | L191-214 | 2 |
| 1882.0029 | (-)EVQLVESGGGLVQPGGSLR(L)                                                                 | H1-19    | 0 |
| 2197.9794 | (R)LSC(Carbamidomethyl)AASGYTFT<br>NYGMNWVR(Q)                                            | H20-38   | 0 |
| 5178.4189 | (R)LSC(Carbamidomethyl)AASGYTFT<br>NYGMNWVRQAPGKGLEWVGWINTY<br>TGEPTYAADFK(R)             | H20-65   | 2 |
| 5334.52   | (R)LSC(Carbamidomethyl)AASGYTFT<br>NYGMNWVRQAPGKGLEWVGWINTY<br>TGEPTYAADFKR(R)            | H20-66   | 3 |
| 2999.4574 | (R)QAPGKGLEWVGWINTYTGEPTYA<br>ADFK(R)                                                     | H39-65   | 1 |
| 3155.5585 | (R)QAPGKGLEWVGWINTYTGEPTYA<br>ADFKR(R)                                                    | H39-66   | 2 |
| 2674.2936 | (K)GLEWVGWINTYTGEPTYAADFKR<br>(R)                                                         | H44-66   | 1 |
| 1201.6212 | (R)RFTFSLDTSK(S)                                                                          | H67-76   | 1 |
| 1045.5201 | (R)FTFSLDTSK(S)                                                                           | H68-76   | 0 |
| 1283.6412 | (K)STAYLQMNSLR(A)                                                                         | H77-87   | 0 |
| 5762.7213 | (R)AEDTAVYYC(Carbamidomethyl)A<br>KYPHYYGSSHWYFDVWGQGLTV<br>SSASTKGPSVFPLAPSSK(S)         | H88-139  | 2 |
| 1186.6467 | (K)GPSVFPLAPSSK(S)                                                                        | H128-139 | 0 |
| 1321.678  | (K)STSGGTAALGC(Carbamidomethyl<br>)LVK(D)                                                 | H140-153 | 0 |
| 8015.9746 | (K)STSGGTAALGC(Carbamidomethyl<br>)LVKDYFPEPVTVSWNSGALTSGVHT<br>FPAVLQSSGLYSLSSVTVPSSSLGT | H140-216 | 1 |



|           |                                                                                                                                                                  |          |   |
|-----------|------------------------------------------------------------------------------------------------------------------------------------------------------------------|----------|---|
|           | QTYIC(Carbamidomethyl)NVNHKPSN<br>TK(V)                                                                                                                          |          |   |
| 8358.165  | (K)STSGGTAALGC(Carbamidomethyl)<br>LVKDYFPEPVTVSWNSGALTSGVHT<br>FPAVLQSSGLYSLSSVVTVPSSSLGT<br>QTYIC(Carbamidomethyl)NVNHKPSN<br>TKVDK(K)                         | H140-219 | 2 |
| 8486.2599 | (K)STSGGTAALGC(Carbamidomethyl)<br>LVKDYFPEPVTVSWNSGALTSGVHT<br>FPAVLQSSGLYSLSSVVTVPSSSLGT<br>QTYIC(Carbamidomethyl)NVNHKPSN<br>TKVDK(K)                         | H140-210 | 3 |
| 8939.5187 | (K)STSGGTAALGC(Carbamidomethyl)<br>LVKDYFPEPVTVSWNSGALTSGVHT<br>FPAVLQSSGLYSLSSVVTVPSSSLGT<br>QTYIC(Carbamidomethyl)NVNHKPSN<br>TKVDK(K)                         | H140-224 | 4 |
| 6713.3145 | (K)DYFPEPVTVSWNSGALTSGVHTF<br>PAVLQSSGLYSLSSVVTVPSSSLGTQ<br>TYIC(Carbamidomethyl)NVNHKPSNT<br>K(V)                                                               | H154-216 | 0 |
| 7055.5048 | (K)DYFPEPVTVSWNSGALTSGVHTF<br>PAVLQSSGLYSLSSVVTVPSSSLGTQ<br>TYIC(Carbamidomethyl)NVNHKPSNT<br>KVVDK(K)                                                           | H154-219 | 1 |
| 7636.8585 | (K)DYFPEPVTVSWNSGALTSGVHTF<br>PAVLQSSGLYSLSSVVTVPSSSLGTQ<br>TYIC(Carbamidomethyl)NVNHKPSNT<br>KVVDK(K)                                                           | H154-224 | 3 |
| 3334.6421 | (K)SC(Carbamidomethyl)DKTHTC(Car<br>bamidomethyl)PPC(Carbamidomethyl)<br>PAPELLGGPSVFLFPPKPK(D)                                                                  | H225-254 | 1 |
| 4151.0585 | (K)SC(Carbamidomethyl)DKTHTC(Car<br>bamidomethyl)PPC(Carbamidomethyl)<br>PAPELLGGPSVFLFPPKPKDTLMISR(<br>T)                                                       | H225-261 | 2 |
| 6271.0681 | (K)SC(Carbamidomethyl)DKTHTC(Car<br>bamidomethyl)PPC(Carbamidomethyl)<br>PAPELLGGPSVFLFPPKPKDTLMISR<br>TPEVTC(Carbamidomethyl)VVVDVSH<br>EDPEVK(F)               | H225-280 | 3 |
| 7929.8522 | (K)SC(Carbamidomethyl)DKTHTC(Car<br>bamidomethyl)PPC(Carbamidomethyl)<br>PAPELLGGPSVFLFPPKPKDTLMISR<br>TPEVTC(Carbamidomethyl)VVVDVSH<br>EDPEVKFNWYVDGVEVHNAK(T) | H225-294 | 4 |

|           |                                                                               |          |   |
|-----------|-------------------------------------------------------------------------------|----------|---|
| 2844.4575 | (K)THTC(Carbamidomethyl)PPC(Carbamidomethyl)PAPELLGGPSVFLFPPKPK(D)            | H229-254 | 0 |
| 4614.2279 | (K)DTLMISRTPEVTC(Carbamidomethyl)VVVDVSHEDPEVKFNWYVDGVEVHNAK(T)               | H255-294 | 2 |
| 2139.0274 | (R)TPEVTC(Carbamidomethyl)VVVDVSHEDPEVK(F)                                    | H262-280 | 0 |
| 3797.8116 | (R)TPEVTC(Carbamidomethyl)VVVDVSHEDPEVKFNWYVDGVEVHNAK(T)                      | H262-294 | 1 |
| 1677.802  | (K)FNWYVDGVEVHNAK(T)                                                          | H281-294 | 0 |
| 5325.5188 | (K)TKPREEQYNSTYRVVSVLTVLHQDWLNGKEYK(C)*                                       | H295-326 | 3 |
| 5613.679  | (K)TKPREEQYNSTYRVVSVLTVLHQDWLNGKEYKC(Carbamidomethyl)K(V)**                   | H295-328 | 4 |
| 6042.0424 | (K)TKPREEQYNSTYRVVSVLTVLHQDWLNGKEYKC(Carbamidomethyl)KVSNK(A)***              | H295-332 | 5 |
| 2228.2074 | (R)VVSVLTVLHQDWLNGKEYK(C)                                                     | H308-326 | 1 |
| 2516.333  | (R)VVSVLTVLHQDWLNGKEYKC(Carbamidomethyl)K(V)                                  | H308-328 | 2 |
| 735.3818  | (K)C(Carbamidomethyl)KVSNK(A)                                                 | H327-332 | 1 |
| 1696.0003 | (K)VSNKALPAPIEKTISK(A)                                                        | H329-344 | 2 |
| 1895.1324 | (K)VSNKALPAPIEKTISKAK(G)                                                      | H329-346 | 3 |
| 838.5033  | (K)ALPAPIEK(T)                                                                | H333-340 | 0 |
| 1267.762  | (K)ALPAPIEKTISK(A)                                                            | H333-344 | 1 |
| 1466.8941 | (K)ALPAPIEKTISKAK(G)                                                          | H333-346 | 2 |
| 4933.6642 | (K)ALPAPIEKTISKAKGQPREPQVYTLPPSREEMTKNQVSLTC(Carbamidomethyl)LVK(G)           | H333-376 | 6 |
| 2971.567  | (K)TISKAKGQPREPQVYTLPPSREEMTK(N)                                              | H341-366 | 4 |
| 4114.1787 | (K)TISKAKGQPREPQVYTLPPSREEMTKNQVSLTC(Carbamidomethyl)LVK(G)                   | H341-376 | 5 |
| 2542.3082 | (K)AKGQPREPQVYTLPPSREEMTK(N)                                                  | H346-366 | 3 |
| 3684.92   | (K)AKGQPREPQVYTLPPSREEMTKNQVSLTC(Carbamidomethyl)LVK(G)                       | H345-376 | 4 |
| 6210.0335 | (K)AKGQPREPQVYTLPPSREEMTKNQVSLTC(Carbamidomethyl)LVKGFYPSDIAVEWESNGQPENNYK(T) | H345-398 | 5 |
| 8621.2596 | (K)AKGQPREPQVYTLPPSREEMTKNQVSLTC(Carbamidomethyl)LVKGFYPS                     | H345-420 | 7 |

|            |                                                                                                                                                                        |          |   |
|------------|------------------------------------------------------------------------------------------------------------------------------------------------------------------------|----------|---|
|            | SDIAVEWESNGQPENNYKTTTPVLD<br>SDGSFFLYSKLTVDK(S)                                                                                                                        |          |   |
| 2343.1762  | (K)GQPREPQVYTLPPSREEMTK(N)                                                                                                                                             | H347-366 | 2 |
| 3485.7879  | (K)GQPREPQVYTLPPSREEMTKNQV<br>SLTC(Carbamidomethyl)LVK(G)                                                                                                              | H347-376 | 3 |
| 6010.9015  | (K)GQPREPQVYTLPPSREEMTKNQV<br>SLTC(Carbamidomethyl)LVKGFYPSD<br>IAVEWESNGQPENNYK(T)                                                                                    | H347-398 | 4 |
| 8665.2607  | (K)GQPREPQVYTLPPSREEMTKNQV<br>SLTC(Carbamidomethyl)LVKGFYPSD<br>IAVEWESNGQPENNYKTTTPVLDSD<br>GSFFLYSKLTVDKSR(W)                                                        | H347-422 | 7 |
| 12091.8591 | (K)GQPREPQVYTLPPSREEMTKNQV<br>SLTC(Carbamidomethyl)LVKGFYPSD<br>IAVEWESNGQPENNYKTTTPVLDSD<br>GSFFLYSKLTVDKSRWQQGNVFSC(<br>Carbamidomethyl)SVMHEALHNHYTQ<br>KSLSLSPG(-) | H347-452 | 9 |
| 3047.554   | (R)EPQVYTLPPSREEMTKNQVSLTC(<br>Carbamidomethyl)LVK(G)                                                                                                                  | H351-376 | 2 |
| 5572.6676  | (R)EPQVYTLPPSREEMTKNQVSLTC(<br>Carbamidomethyl)LVKGFYPSDIAVE<br>WESNGQPENNYK(T)                                                                                        | H351-398 | 3 |
| 1161.6296  | (K)NQVSLTC(Carbamidomethyl)LVK(<br>G)                                                                                                                                  | H367-376 | 0 |
| 6097.9692  | (K)NQVSLTC(Carbamidomethyl)LVKG<br>FYPSDIAVEWESNGQPENNYKTTTP<br>VLDSGSDGSFFLYSKLTVDK(S)                                                                                | H367-420 | 3 |
| 2544.1314  | (K)GFYPSDIAVEWESNGQPENNYK(<br>T)                                                                                                                                       | H377-398 | 0 |
| 4399.0354  | (K)GFYPSDIAVEWESNGQPENNYKT<br>TPPVLDSDGSFFLYSK(L)                                                                                                                      | H377-415 | 1 |
| 5198.4906  | (K)GFYPSDIAVEWESNGQPENNYKT<br>TPPVLDSDGSFFLYSKLTVDKSR(W)                                                                                                               | H377-422 | 3 |
| 7980.7398  | (K)GFYPSDIAVEWESNGQPENNYKT<br>TPPVLDSDGSFFLYSKLTVDKSRWQ<br>QQGNVFSC(Carbamidomethyl)SVMHE<br>ALHNHYTQK(S)                                                              | H377-445 | 4 |
| 2673.377   | (K)TTPPVLDSDGSFFLYSKLTVDKSR<br>(W)                                                                                                                                     | H399-422 | 2 |
| 5455.6263  | (K)TTPPVLDSDGSFFLYSKLTVDKSR<br>WQQGNVFSC(Carbamidomethyl)SV<br>MHEALHNHYTQK(S)                                                                                         | H399-445 | 3 |
| 3442.6043  | (R)WQQGNVFSC(Carbamidomethyl)S<br>VMHEALHNHYTQKSLSLSPG(-)                                                                                                              | H423-452 | 1 |

\*5325.5188 is the monoisotopic mass for H295-326 with G0F glycosylation.

\*\*5613.679 is the monoisotopic mass for H295-328 with G0F glycosylation.

\*\*\*6042.0424 is the monoisotopic mass for H295-332 with G0F glycosylation.

**Table S-11.** Light- and heavy-chain peptides identified from a spin-membrane (spun at 500 g) tryptic digest of **Rituxan**.

| m/z of [M+H] <sup>+</sup> | Peptide Sequence                                                                       | Amino Acids | Missed cleavages |
|---------------------------|----------------------------------------------------------------------------------------|-------------|------------------|
| 1808.0248                 | (-) QIVLSQSPAILSASPGEK(V)                                                              | L1-18       | 0                |
| 2556.3486                 | (-)QIVLSQSPAILSASPGEKVTMT<br>C(Carbamidomethyl)R(A)                                    | L1-24       | 1                |
| 3933.0082                 | (R)<br>ASSSVSYIHWFQQKPGSSPKPWIY<br>ATSNLASG<br>VPVR(F)                                 | L25-60      | 0                |
| 1606.7707                 | (R) FSGSGSGTSYSLTISR(V)                                                                | L61-76      | 0                |
| 4466.0154                 | (R)<br>FSGSGSGTSYSLTISRVEAEDAATY<br>Y<br>C(Carbamidomethyl)QQWTSNPPTF<br>GGGTK(L)      | L61-102     | 1                |
| 4949.321                  | (R)<br>FSGSGSGTSYSLTISRVEAEDAATY<br>Y<br>C(Carbamidomethyl)QQWTSNPPTF<br>GGGTKLEIK(R)  | L61-106     | 2                |
| 5105.4222                 | (R)<br>FSGSGSGTSYSLTISRVEAEDAATY<br>Y<br>C(Carbamidomethyl)QQWTSNPPTF<br>GGGTKLEIKR(T) | L61-107     | 3                |
| 2878.2625                 | (R)<br>VEAEDAATYYC(Carbamidomethyl)Q<br>QWTSNPP<br>TFGGGTK(L)                          | L77-102     | 0                |
| 3361.5681                 | (R)<br>VEAEDAATYYC(Carbamidomethyl)Q<br>QWTSNP<br>PTFGGGTKLEIK(R)                      | L77-106     | 1                |
| 3517.6693                 | (R)<br>VEAEDAATYYC(Carbamidomethyl)Q<br>QWTSNP                                         | L77-107     | 2                |

|           |                                                                                                  |          |   |
|-----------|--------------------------------------------------------------------------------------------------|----------|---|
|           | PTFGGGTKLEIKR(T)                                                                                 |          |   |
| 2102.1281 | (K) RTVAAPSVFIFPPSDEQLK(S)                                                                       | L107-125 | 1 |
| 1946.027  | (R) TVAAPSVFIFPPSDEQLK(S)                                                                        | L108-125 | 0 |
| 3724.9043 | (R)<br>TVAAPSVFIFPPSDEQLKSGTASVV<br>C(Carbamidomethyl)LLNNFYPR(E)                                | L108-141 | 1 |
| 4053.079  | (R)<br>TVAAPSVFIFPPSDEQLKSGTASVV<br>C(Carbamidomethyl)LLNNFYPR(E)<br>(V)                         | L108-144 | 2 |
| 1797.8952 | (K)<br>SGTASVVC(Carbamidomethyl)LLNN<br>FYPR(E)                                                  | L126-141 | 0 |
| 2126.0699 | (K)<br>SGTASVVC(Carbamidomethyl)LLNN<br>FYPR(E)<br>(V)                                           | L126-144 | 1 |
| 4161.0106 | (K)VQWKVDNALQSGNSQESVTEQ<br>DSKDSTYLSSTLTLSK(A)                                                  | L145-182 | 2 |
| 4767.2755 | (K)VQWKVDNALQSGNSQESVTEQ<br>DSKDSTYLSSTLTLSKADYEK(H)                                             | L145-187 | 3 |
| 5032.4294 | (K)VQWKVDNALQSGNSQESVTEQ<br>DSKDSTYLSSTLTLSKADYEKHK(V)                                           | L145-189 | 4 |
| 6889.3385 | (K)VQWKVDNALQSGNSQESVTEQ<br>DSKDSTYLSSTLTLSKADYEKHKV<br>YAC(Carbamidomethyl)EVTHQGLSS<br>PVTK(S) | L145-206 | 5 |
| 3619.7093 | (K)VDNALQSGNSQESVTEQDSKDS<br>TYLSSTLTLSK(A)                                                      | L149-182 | 1 |
| 4225.9743 | (K)VDNALQSGNSQESVTEQDSKDS<br>TYLSSTLTLSKADYEK(H)                                                 | L149-187 | 2 |
| 4491.1281 | (K)VDNALQSGNSQESVTEQDSKDS<br>TYLSSTLTLSKADYEKHK(V)                                               | L149-189 | 3 |
| 6348.0372 | (K)VDNALQSGNSQESVTEQDSKDS<br>TYLSSTLTLSKADYEKHKVYAC(Ca<br>rbamidomethyl)EVTHQGLSSPVTK(S<br>)     | L149-206 | 4 |
| 1502.7584 | (K) DSTYLSSTLTLSK(A)                                                                             | L169-182 | 0 |
| 4231.0863 | (K)DSTYLSSTLTLSKADYEKHKVY<br>AC(Carbamidomethyl)EVTHQGLSSP<br>VTK(S)                             | L169-206 | 3 |
| 2747.3457 | (K)ADYEKHKVYAC(Carbamidometh<br>yl)EVTHQGLSSPVTK(S)                                              | L183-206 | 2 |

|           |                                                                                                            |          |   |
|-----------|------------------------------------------------------------------------------------------------------------|----------|---|
| 2141.0808 | (K)HKVYAC(Carbamidomethyl)EVTH<br>QGLSSPVT(K)                                                              | L188-206 | 1 |
| 1875.9269 | (K)<br>VYAC(Carbamidomethyl)EVTHQGLS<br>SPVT(K)                                                            | L190-206 | 0 |
| 1960.1098 | (-) QVQLQQPGAELVKPGASVK(M)                                                                                 | H1-19    | 0 |
| 1791.8159 | (K) ASGYTFTSYNMHWVK(Q)                                                                                     | H24-38   | 0 |
| 2183.0404 | (R) GLEWIGAIYPGNGDTSYNQK(F)                                                                                | H44-63   | 0 |
| 2458.2038 | (R)<br>GLEWIGAIYPGNGDTSYNQKFK(G)                                                                           | H44-65   | 1 |
| 3562.6676 | (K)GKATLTADKSSSTAYMQLSSLTS<br>EDSAVYYC(Carbamidomethyl)AR(S)                                               | H66-98   | 2 |
| 3377.5512 | (K)ATLTADKSSSTAYMQLSSLTSED<br>SAVYYC(Carbamidomethyl)AR(S)                                                 | H68-98   | 1 |
| 2677.1756 | (K)SSSTAYMQLSSLTSEDSAVYYC(<br>Carbamidomethyl)AR(S)                                                        | H75-98   | 0 |
| 2889.3366 | (R)<br>STYYGGDWYFNVWGAGTTVTVSA<br>ASTK(G)                                                                  | H99-125  | 0 |
| 1186.6467 | (K) GPSVFPLAPSSK(S)                                                                                        | H126-137 | 0 |
| 1321.678  | (K)<br>STSGGTAALGC(Carbamidomethyl)L<br>VK(D)                                                              | H138-151 | 0 |
| 6713.3145 | (K)DYFPEPVTVSWNSGALTSGVHT<br>FPAVLQSSGLYSLSSVTVPSSSLG<br>TQTYIC(Carbamidomethyl)NVNHKP<br>SNTK(V)          | H152-214 | 0 |
| 7055.5048 | (K)DYFPEPVTVSWNSGALTSGVHT<br>FPAVLQSSGLYSLSSVTVPSSSLG<br>TQTYIC(Carbamidomethyl)NVNHKP<br>SNTKV(D)         | H152-217 | 1 |
| 3334.6421 | (K)SC(Carbamidomethyl)DKTHTC(C<br>arbamidomethyl)PPC(Carbamidomet<br>hyl)PAPELLGGPSVFLFPPKPK(D)            | H223-252 | 1 |
| 4151.0585 | (K)SC(Carbamidomethyl)DKTHTC(C<br>arbamidomethyl)PPC(Carbamidomet<br>hyl)PAPELLGGPSVFLFPPKPKDTL<br>MISR(T) | H223-259 | 2 |
| 2844.4575 | (K)THTC(Carbamidomethyl)PPC(Car<br>bamidomethyl)PAPELLGGPSVFLFP<br>PKPK(D)                                 | H227-252 | 0 |
| 3660.8739 | (K)THTC(Carbamidomethyl)PPC(Car<br>bamidomethyl)PAPELLGGPSVFLFP<br>PKPKDTLMISR(T)                          | H227-259 | 1 |
| 835.4342  | (K) DTLMISR(T)                                                                                             | H253-259 | 0 |

|           |                                                                                 |          |   |
|-----------|---------------------------------------------------------------------------------|----------|---|
| 4614.2279 | (K)DTLMISRTPEVTC(Carbamidomethyl)VVVDVSHEDPEVKFNWYVDGV<br>EVHNAK(T)             | H253-292 | 2 |
| 2139.0274 | (R)TPEVTC(Carbamidomethyl)VVVD<br>VSHEDPEVK(F)                                  | H260-278 | 0 |
| 3797.8116 | (R)TPEVTC(Carbamidomethyl)VVVD<br>VSHEDPEVKFNWYVDGVEVHNAK(<br>T)                | H260-292 | 1 |
| 1677.802  | (K) FNWYVDGVEVHNAK(T)                                                           | H279-292 | 0 |
| 4843.2928 | (R)<br>EEQYNSTYRVVSVLTVLHQDWLNG<br>KEYK(C)*                                     | H297-324 | 2 |
| 5005.3526 | (R)<br>EEQYNSTYRVVSVLTVLHQDWLNG<br>KEYK(C)**                                    | H297-324 | 2 |
| 5167.3993 | (R)<br>EEQYNSTYRVVSVLTVLHQDWLNG<br>KEYK(C)***                                   | H297-324 | 2 |
| 2228.2074 | (R) VVSVLTVLHQDWLNGKEYK(C)                                                      | H306-324 | 1 |
| 838.5033  | (K) ALPAPIEK(T)                                                                 | H331-338 | 0 |
| 1267.762  | (K) ALPAPIEKTISK(A)                                                             | H331-342 | 1 |
| 2311.2041 | (K) GQPREPQVYTLPPSRDELTK(N)                                                     | H345-364 | 2 |
| 1872.9702 | (R) EPQVYTLPPSRDELTK(N)                                                         | H349-364 | 1 |
| 3015.5819 | (R)EPQVYTLPPSRDELTKNQVSLTC<br>(Carbamidomethyl)LVK(G)                           | H349-374 | 2 |
| 5540.6955 | (R)EPQVYTLPPSRDELTKNQVSLTC<br>(Carbamidomethyl)LVKGFYPSDIAV<br>EWESNGQPENNYK(T) | H349-396 | 3 |
| 1161.6296 | (K)<br>NQVSLTC(Carbamidomethyl)LVK(G)                                           | H365-374 | 0 |
| 2544.1314 | (K)<br>GFYPSDIAVEWESNGQPENNYK(T)                                                | H375-396 | 0 |
| 2430.2439 | (K)<br>TTPPVLDSDGSFFLYSKLTVDK(S)                                                | H397-418 | 1 |
| 2673.377  | (K)<br>TTPPVLDSDGSFFLYSKLTVDKSR(<br>W)                                          | H397-420 | 2 |
| 2801.2671 | (R)WQQGNVFSC(Carbamidomethyl)<br>SVMHEALHNHYTQK(S)                              | H421-443 | 0 |

\*4843.2928 is the monoisotopic mass for H297-324 with G0F glycosylation.

\*\*5005.3526 is the monoisotopic mass for H297-324 with G1F glycosylation.

\*\*\*5167.3993 is the monoisotopic mass for H297-324 with G2F glycosylation.

**Table S-12.** Light- and heavy-chain peptides identified from a spin-membrane (spun at 500 g) tryptic digest of **Vectibix**.

| m/z of [M+H] <sup>+</sup> | Peptide Sequence                                                                                                                                                                | Amino Acids | Missed cleavages |
|---------------------------|---------------------------------------------------------------------------------------------------------------------------------------------------------------------------------|-------------|------------------|
| 4998.436                  | (-) <b>DIQMTQSPSSLSASVGDRVITIC</b> (Carbamido methyl) <b>QASQDISNYLNWYQQKPGKAPK(L)</b>                                                                                          | L1-45       | 2                |
| 6727.3407                 | (-) <b>DIQMTQSPSSLSASVGDRVITIC</b> (Carbamido methyl) <b>QASQDISNYLNWYQQKPGKAPKLLIYDASNLETGVPSR(F)</b>                                                                          | L1-61       | 3                |
| 11874.817                 | (-) <b>DIQMTQSPSSLSASVGDRVITIC</b> (Carbamido methyl) <b>QASQDISNYLNWYQQKPGKAPKLLIYDASNLETGVPSRFSGSGSGTDFTFTISSLQPEDIATYFC</b> (Carbamidomethyl) <b>QHFDHLPLAFGGGTKVEIKR(T)</b> | L1-108      | 6                |
| 3138.5677                 | (R) <b>VTITC</b> (Carbamidomethyl) <b>QASQDISNYLNWYQQKPGKAPK(L)</b>                                                                                                             | L19-45      | 1                |
| 1747.9225                 | (K) <b>LLIYDASNLETGVPSR(F)</b>                                                                                                                                                  | L46-61      | 0                |
| 6895.3989                 | (K) <b>LLIYDASNLETGVPSRFSGSGSGTDFTFTISSLQPEDIATYFC</b> (Carbamidomethyl) <b>QHFDHLPLAFGGGTKVEIKR(T)</b>                                                                         | L46-108     | 3                |
| 5166.4942                 | (R) <b>FSGSGSGTDFTFTISSLQPEDIATYFC</b> (Carbamidomethyl) <b>QHFDHLPLAFGGGTKVEIKR(T)</b>                                                                                         | L62-108     | 2                |
| 2102.1281                 | (K) <b>RTVAAPSVFIFPPSDEQLK(S)</b>                                                                                                                                               | L108-126    | 1                |
| 3881.0055                 | (K) <b>RTVAAPSVFIFPPSDEQLKSGTASVVC</b> (Carbamidomethyl) <b>LLNMFYPR(E)</b>                                                                                                     | L108-142    | 2                |
| 4209.1801                 | (K) <b>RTVAAPSVFIFPPSDEQLKSGTASVVC</b> (Carbamidomethyl) <b>LLNMFYPREAK(V)</b>                                                                                                  | L108-145    | 3                |
| 1946.027                  | (R) <b>TVAAPSVFIFPPSDEQLK(S)</b>                                                                                                                                                | L109-126    | 0                |
| 3724.9043                 | (R) <b>TVAAPSVFIFPPSDEQLKSGTASVVC</b> (Carbamidomethyl) <b>LLNMFYPR(E)</b>                                                                                                      | L109-142    | 1                |
| 4053.079                  | (R) <b>TVAAPSVFIFPPSDEQLKSGTASVVC</b> (Carbamidomethyl) <b>LLNMFYPREAK(V)</b>                                                                                                   | L109-145    | 2                |



|            |                                                                                                                                                                                            |          |    |
|------------|--------------------------------------------------------------------------------------------------------------------------------------------------------------------------------------------|----------|----|
| 4594.3803  | (R)TVAAPSVFIFPPSDEQLKSGTAS<br>VVC(Carbamidomethyl)LLNNFYPRE<br>AKVQWK(V)                                                                                                                   | L109-149 | 3  |
| 10923.3997 | (R)TVAAPSVFIFPPSDEQLKSGTAS<br>VVC(Carbamidomethyl)LLNNFYPRE<br>AKVQWKVDNALQSGNSQESVTEQ<br>DSKDSTYLSSTLTLSKADYEKHKV<br>YAC(Carbamidomethyl)EVTHQGLSS<br>PVTK(S)                             | L109-207 | 8  |
| 11773.7389 | (R)TVAAPSVFIFPPSDEQLKSGTAS<br>VVC(Carbamidomethyl)LLNNFYPRE<br>AKVQWKVDNALQSGNSQESVTEQ<br>DSKDSTYLSSTLTLSKADYEKHKV<br>YAC(Carbamidomethyl)EVTHQGLSS<br>PVTKSFNRGEC(Carbamidomethyl)(-<br>) | L109-214 | 10 |
| 2126.0699  | (K)SGTASVVC(Carbamidomethyl)LL<br>NNFYPREAK(V)                                                                                                                                             | L127-145 | 1  |
| 8996.3906  | (K)SGTASVVC(Carbamidomethyl)LL<br>NNFYPREAKVQWKVDNALQSGNS<br>QESVTEQDSKDSTYLSSTLTLSKA<br>DYEKHKVYAC(Carbamidomethyl)EV<br>THQGLSSPVTK(S)                                                   | L127-207 | 7  |
| 7217.5132  | (R)EAKVQWKVDNALQSGNSQESV<br>TEQDSKDSTYLSSTLTLSKADYEK<br>HKVYAC(Carbamidomethyl)EVTHQ<br>GLSSPVTK(S)                                                                                        | L143-207 | 6  |
| 8067.8524  | (R)EAKVQWKVDNALQSGNSQESV<br>TEQDSKDSTYLSSTLTLSKADYEK<br>HKVYAC(Carbamidomethyl)EVTHQ<br>GLSSPVTKSFNRGEC(Carbamidom<br>ethyl)(-)                                                            | L143-214 | 8  |
| 4161.0106  | (K)VQWKVDNALQSGNSQESVTEQ<br>DSKDSTYLSSTLTLSK(A)                                                                                                                                            | L146-183 | 2  |
| 6889.3385  | (K)VQWKVDNALQSGNSQESVTEQ<br>DSKDSTYLSSTLTLSKADYEKHKV<br>YAC(Carbamidomethyl)EVTHQGLSS<br>PVTK(S)                                                                                           | L146-207 | 5  |
| 7739.6777  | (K)VQWKVDNALQSGNSQESVTEQ<br>DSKDSTYLSSTLTLSKADYEKHKV<br>YAC(Carbamidomethyl)EVTHQGLSS<br>PVTKSFNRGEC(Carbamidomethyl)(-<br>)                                                               | L146-214 | 7  |
| 3619.7093  | (K)VDNALQSGNSQESVTEQDSKDS<br>TYSLSSTLTLSK(A)                                                                                                                                               | L150-183 | 1  |

|           |                                                                                                                                                                                                                                |          |   |
|-----------|--------------------------------------------------------------------------------------------------------------------------------------------------------------------------------------------------------------------------------|----------|---|
| 6348.0372 | (K)VDNALQSGNSQESVTEQDSKDS<br>TYSLSSTLTLISKADYEKHKVYAC(Ca<br>rbamidomethyl)EVTHQGLSSPVTK(S<br>)                                                                                                                                 | L150-207 | 4 |
| 2747.3457 | (K)ADYEKHKVYAC(Carbamidometh<br>yl)EVTHQGLSSPVTK(S)                                                                                                                                                                            | L184-207 | 2 |
| 3597.6849 | (K)ADYEKHKVYAC(Carbamidometh<br>yl)EVTHQGLSSPVTKSFNRGEC(Car<br>bamidomethyl)(-)                                                                                                                                                | L184-214 | 4 |
| 2141.0808 | (K)HKVYAC(Carbamidomethyl)EVTH<br>QGLSSPVTK(S)                                                                                                                                                                                 | L189-207 | 1 |
| 1875.9269 | (K)VYAC(Carbamidomethyl)EVTHQ<br>GLSSPVTK(S)                                                                                                                                                                                   | L191-207 | 0 |
| 2726.2661 | (K)VYAC(Carbamidomethyl)EVTHQ<br>GLSSPVTKSFNRGEC(Carbamidom<br>ethyl)(-)                                                                                                                                                       | L191-214 | 2 |
| 7260.539  | (-)QVQLQESGPGLVKPSSETLSLTC(<br>Carbamidomethyl)TVSGGSVSSGDY<br>YWTWIRQSPGKGLEWIGHIYYSGN<br>TNYNPSLK(S)                                                                                                                         | H1-66    | 2 |
| 14701.312 | (-)QVQLQESGPGLVKPSSETLSLTC(<br>Carbamidomethyl)TVSGGSVSSGDY<br>YWTWIRQSPGKGLEWIGHIYYSGN<br>TNYNPSLKSRSLTISIDTSKTQFSLKL<br>SSVTAADTAIYYC(Carbamidomethyl<br>)VRDRVTFGAFDIWGQGTMTVSSA<br>STKGPSVFPLAPC(Carbamidomethy<br>l)SR(S) | H1-135   | 9 |
| 2514.2293 | (R)DRVTFGAFDIWGQGTMTVSSAS<br>TK(G)                                                                                                                                                                                             | H100-123 | 1 |
| 3782.8629 | (R)DRVTFGAFDIWGQGTMTVSSAS<br>TKGPSVFPLAPC(Carbamidomethyl)<br>SR(S)                                                                                                                                                            | H100-135 | 2 |
| 1287.6514 | (K)GPSVFPLAPC(Carbamidomethyl)<br>SR(S)                                                                                                                                                                                        | H124-135 | 0 |
| 1423.7097 | (R)STSESTAALGC(Carbamidomethy<br>l)LVK(D)                                                                                                                                                                                      | H136-149 | 0 |
| 8167.9492 | (R)STSESTAALGC(Carbamidomethy<br>l)LVKDYFPEPVTVSWNSGALTSGV<br>HTFPAVLQSSGLYSLSSVVTVPSSN<br>FGTQTYTC(Carbamidomethyl)NVD<br>HKPSNTK(V)                                                                                          | H136-212 | 1 |
| 8510.1395 | (R)STSESTAALGC(Carbamidomethy<br>l)LVKDYFPEPVTVSWNSGALTSGV<br>HTFPAVLQSSGLYSLSSVVTVPSSN                                                                                                                                        | H136-215 | 2 |

|           |                                                                                                                                                                          |          |   |
|-----------|--------------------------------------------------------------------------------------------------------------------------------------------------------------------------|----------|---|
|           | FGTQTYTC(Carbamidomethyl)NVD<br>HKPSNTKVDK(T)                                                                                                                            |          |   |
| 9123.4943 | (R)STSESTAALGC(Carbamidomethyl)LVKDYFPEPVTVSWNSGALTSGV<br>HTFPAVLQSSGLYSLSSVVTVPSSN<br>FGTQTYTC(Carbamidomethyl)NVD<br>HKPSNTKVDKTVK(C)                                  | H136-220 | 4 |
| 6763.2573 | (K)DYFPEPVTVSWNSGALTSGVHT<br>FPAVLQSSGLYSLSSVVTVPSSNFG<br>TQTYTC(Carbamidomethyl)NVDHKP<br>SNTK(V)                                                                       | H150-212 | 0 |
| 7105.4477 | (K)DYFPEPVTVSWNSGALTSGVHT<br>FPAVLQSSGLYSLSSVVTVPSSNFG<br>TQTYTC(Carbamidomethyl)NVDHKP<br>SNTKVDK(T)                                                                    | H150-215 | 1 |
| 3036.4966 | (R)KC(Carbamidomethyl)C(Carbamidomethyl)VEC(Carbamidomethyl)PPC<br>(Carbamidomethyl)PAPPVAGPSVFL<br>FPPKPK(D)                                                            | H220-246 | 1 |
| 3852.913  | (R)KC(Carbamidomethyl)C(Carbamidomethyl)VEC(Carbamidomethyl)PPC<br>(Carbamidomethyl)PAPPVAGPSVFL<br>FPPKPKDTLMISR(T)                                                     | H220-253 | 2 |
| 7631.6704 | (R)KC(Carbamidomethyl)C(Carbamidomethyl)VEC(Carbamidomethyl)PPC<br>(Carbamidomethyl)PAPPVAGPSVFL<br>FPPKPKDTLMISRTPVTC(Carbamidomethyl)VVDVSHEDPEVQFNWY<br>VDGVEVHNAK(T) | H220-286 | 3 |
| 2908.4017 | (K)C(Carbamidomethyl)C(Carbamidomethyl)VEC(Carbamidomethyl)PPC<br>(Carbamidomethyl)PAPPVAGPSVFL<br>FPPKPK(D)                                                             | H221-246 | 0 |
| 3724.8181 | (K)C(Carbamidomethyl)C(Carbamidomethyl)VEC(Carbamidomethyl)PPC<br>(Carbamidomethyl)PAPPVAGPSVFL<br>FPPKPKDTLMISR(T)                                                      | H221-253 | 1 |
| 7503.5754 | (K)C(Carbamidomethyl)C(Carbamidomethyl)VEC(Carbamidomethyl)PPC<br>(Carbamidomethyl)PAPPVAGPSVFL<br>FPPKPKDTLMISRTPVTC(Carbamidomethyl)VVDVSHEDPEVQFNWY<br>VDGVEVHNAK(T)  | H221-286 | 2 |
| 4614.1916 | (K)DTLMISRTPVTC(Carbamidomethyl)VVDVSHEDPEVQFNWYVDGVEVHNAK(T)                                                                                                            | H247-286 | 1 |

|           |                                                                                                                |          |    |
|-----------|----------------------------------------------------------------------------------------------------------------|----------|----|
| 3797.7752 | (R)TPEVTC(Carbamidomethyl)VVVD<br>VSHEDPEVQFNWYVDGVEVHNAK(<br>T)                                               | H254-286 | 0  |
| 5279.5233 | (K)TKPREEQFNSTFRVVSVLTVVH<br>QDWLNGKEYK(C)*                                                                    | H287-318 | 3  |
| 5567.649  | (K)TKPREEQFNSTFRVVSVLTVVH<br>QDWLNGKEYKC(Carbamidomethyl)<br>K(V)**                                            | H287-320 | 4  |
| 9301.4297 | (R)EEQFNSTFRVVSVLTVVHQDWL<br>NGKEYKC(Carbamidomethyl)KVS<br>N<br>KGLPAPIEKTISKTKGQPREPQVYTL<br>PPSREEMTK(N)*** | H291-358 | 10 |
| 2214.1917 | (R)VVSVLTVVHQDWLNGKEYK(C)                                                                                      | H300-318 | 1  |
| 2502.3173 | (R)VVSVLTVVHQDWLNGKEYKC(C<br>arbamidomethyl)K(V)                                                               | H300-320 | 2  |
| 2930.5557 | (R)VVSVLTVVHQDWLNGKEYKC(C<br>arbamidomethyl)KVS NK(G)                                                          | H300-324 | 3  |
| 3736.0255 | (R)VVSVLTVVHQDWLNGKEYKC(C<br>arbamidomethyl)KVS NKGLPAPIEK(<br>T)                                              | H300-332 | 4  |
| 1540.8516 | (K)C(Carbamidomethyl)KVS NKGLPA<br>PIEK(T)                                                                     | H319-332 | 2  |
| 1252.726  | (K)VS NKGLPAPIEK(T)                                                                                            | H321-332 | 1  |
| 1681.9847 | (K)VS NKGLPAPIEKTISK(T)                                                                                        | H321-336 | 2  |
| 1911.1273 | (K)VS NKGLPAPIEKTISKTK(G)                                                                                      | H321-338 | 3  |
| 1253.7464 | (K)GLPAPIEKTISK(T)                                                                                             | H325-336 | 1  |
| 1482.889  | (K)GLPAPIEKTISKTK(G)                                                                                           | H325-338 | 2  |
| 3807.0473 | (K)GLPAPIEKTISKTKGQPREPQVY<br>TLPPSREEMTK(N)                                                                   | H325-358 | 5  |
| 4949.6591 | (K)GLPAPIEKTISKTKGQPREPQVY<br>TLPPSREEMTKNQVSLTC(Carbami<br>domethyl)LVK(G)                                    | H325-368 | 6  |
| 3001.5775 | (K)TISKTKGQPREPQVYTLPPSREE<br>MTK(N)                                                                           | H333-358 | 4  |
| 4144.1893 | (K)TISKTKGQPREPQVYTLPPSREE<br>MTKNQVSLTC(Carbamidomethyl)LV<br>K(G)                                            | H333-368 | 5  |
| 2572.3188 | (K)TKGQPREPQVYTLPPSREEMTK(<br>N)                                                                               | H337-358 | 3  |
| 3714.9306 | (K)TKGQPREPQVYTLPPSREEMTK<br>NQVSLTC(Carbamidomethyl)LVK(G)                                                    | H337-368 | 4  |
| 2343.1762 | (K)GQPREPQVYTLPPSREEMTK(N)                                                                                     | H339-358 | 2  |
| 3485.7879 | (K)GQPREPQVYTLPPSREEMTKNQ<br>VSLTC(Carbamidomethyl)LVK(G)                                                      | H339-368 | 3  |

|            |                                                                                                                                                                       |          |   |
|------------|-----------------------------------------------------------------------------------------------------------------------------------------------------------------------|----------|---|
| 6010.9015  | (K)GQPREPQVYTLPPSREEMTKNQ<br>VSLTC(Carbamidomethyl)LVKGFP<br>SDIAVEWESNGQPENNYK(T)                                                                                    | H339-390 | 4 |
| 11479.482  | (K)GQPREPQVYTLPPSREEMTKNQ<br>VSLTC(Carbamidomethyl)LVKGFP<br>SDIAVEWESNGQPENNYKTTTPML<br>DSDGSFFLYSKLTVDKSRWQQGNV<br>FSC(Carbamidomethyl)SVMHEALH<br>NHYTQK(S)        | H339-437 | 8 |
| 12120.8204 | (K)GQPREPQVYTLPPSREEMTKNQ<br>VSLTC(Carbamidomethyl)LVKGFP<br>SDIAVEWESNGQPENNYKTTTPML<br>DSDGSFFLYSKLTVDKSRWQQGNV<br>FSC(Carbamidomethyl)SVMHEALH<br>NHYTQKSLSLSPG(-) | H339-444 | 9 |
| 1904.9422  | (R)EPQVYTLPPSREEMTK(N)                                                                                                                                                | H343-358 | 1 |
| 3047.554   | (R)EPQVYTLPPSREEMTKNQVSLT<br>C(Carbamidomethyl)LVK(G)                                                                                                                 | H343-368 | 2 |
| 5572.6676  | (R)EPQVYTLPPSREEMTKNQVSLT<br>C(Carbamidomethyl)LVKGFPDIA<br>VEWESNGQPENNYK(T)                                                                                         | H343-390 | 3 |
| 1161.6296  | (K)NQVSLTC(Carbamidomethyl)LVK<br>(G)                                                                                                                                 | H359-368 | 0 |
| 6129.9413  | (K)NQVSLTC(Carbamidomethyl)LVK<br>GFYPSDIAVEWESNGQPENNYKTT<br>PPMLDSDGSFFLYSKLTVDK(S)                                                                                 | H359-412 | 3 |
| 5230.4626  | (K)GFYPSDIAVEWESNGQPENNYK<br>TTPPMLDSDGSFFLYSKLTVDKSR(<br>W)                                                                                                          | H369-414 | 3 |
| 8012.7119  | (K)GFYPSDIAVEWESNGQPENNYK<br>TTPPMLDSDGSFFLYSKLTVDKSR<br>WQQGNVFSC(Carbamidomethyl)SV<br>MHEALHNHYTQK(S)                                                              | H369-437 | 4 |
| 8654.0503  | (K)GFYPSDIAVEWESNGQPENNYK<br>TTPPMLDSDGSFFLYSKLTVDKSR<br>WQQGNVFSC(Carbamidomethyl)SV<br>MHEALHNHYTQKSLSLSPG(-)                                                       | H369-444 | 5 |
| 5487.5984  | (K)TTPPMLDSDGSFFLYSKLTVDKS<br>RWQQGNVFSC(Carbamidomethyl)S<br>VMHEALHNHYTQK(S)                                                                                        | H391-437 | 3 |
| 4242.0608  | (K)LTVDKSRWQQGNVFSC(Carbam<br>idomethyl)SVMHEALHNHYTQKSL<br>LSPG(-)                                                                                                   | H408-444 | 3 |
| 2801.2671  | (R)WQQGNVFSC(Carbamidomethyl)<br>SVMHEALHNHYTQK(S)                                                                                                                    | H415-437 | 0 |

|           |                                                           |          |   |
|-----------|-----------------------------------------------------------|----------|---|
| 3442.6056 | (R)WQQGNVFSC(Carbamidomethyl)<br>SVMHEALHNHYTQKSLSLSPG(-) | H415-444 | 1 |
|-----------|-----------------------------------------------------------|----------|---|

\*5279.5233 is the monoisotopic mass for H287-318 with G0F glycosylation.

\*\*5567.649 is the monoisotopic mass for H287-320 with G0F glycosylation.

\*\*\*9301.4297 is the monoisotopic mass for H291-358 with G0F glycosylation.

**Table S-13.** Light- and heavy-chain peptides identified from an overnight in-solution peptic digest of **Herceptin**.

| m/z of [M+H] <sup>+</sup> | Peptide Sequence                          | Amino Acids |
|---------------------------|-------------------------------------------|-------------|
| 1105.5848                 | (L)SASVGDRVIT(C)                          | L12-22      |
| 1257.7314                 | (W)YQQKPGKAPKL(L)                         | L36-46      |
| 1919.9246                 | (F)LYSGVPSRFSGSRSGTDF(T)                  | L54-71      |
| 1659.7721                 | (L)YSGVPSRFSGSRSGTD(F)                    | L55-70      |
| 1806.8406                 | (L)YSGVPSRFSGSRSGTDF(T)                   | L55-71      |
| 1136.547                  | (L)TISSLQPEDF(A)                          | L74-83      |
| 3517.7573                 | (T)YYCQQHYTTPPTFGQGTKVEIKRTVAAPSV<br>F(I) | L86-116     |
| 3207.6255                 | (Y)YCQQHYTTPPTFGQGTKVEIKRTVAAPSV(<br>F)   | L87-115     |
| 3354.694                  | (Y)YCQQHYTTPPTFGQGTKVEIKRTVAAPSVF<br>(I)  | L87-116     |
| 2832.5043                 | (Q)HYTTPPTFGQGTKVEIKRTVAAPSVF(I)          | L91-116     |
| 1192.5885                 | (V)FIFPPSDEQL(K)                          | L116-125    |
| 1675.8537                 | (F)IFPPSDEQLKSGTASV(V)                    | L117-132    |
| 1843.947                  | (F)PPSDEQLKSGTASVVCLL(N)                  | L119-136    |
| 1998.0113                 | (L)KSGTASVVCLLNNFYPRE(A)                  | L126-143    |
| 1052.516                  | (L)LNNFYPRE(A)                            | L136-143    |
| 2305.2088                 | (L)LNNFYPREAKVQWKVDNAL(Q)                 | L136-154    |
| 3035.497                  | (L)LNNFYPREAKVQWKVDNALQSGNSQE(S)          | L136-161    |
| 2001.9988                 | (E)AKVQWKVDNALQSGNSQE(S)                  | L144-161    |
| 1271.7106                 | (E)AKVQWKVDNAL(Q)                         | L144-154    |
| 1559.7071                 | (E)SVTEQDSKDSTYSL(S)                      | L162-175    |
| 1834.8189                 | (E)SVTEQDSKDSTYSLSST(L)                   | L162-178    |
| 1998.0001                 | (T)LTLSKADYEKHKVYACE(V)                   | L179-195    |
| 1884.916                  | (L)TLSKADYEKHKVYACE(V)                    | L180-195    |
| 2047.0025                 | (E)VTHQGLSSPVTKSFNRGEC(-)                 | L196-214    |
| 1411.6634                 | (L)SSPVTKSFNRGEC(-)                       | L202-214    |

|           |                                                      |          |
|-----------|------------------------------------------------------|----------|
| 2002.0022 | (L)VESGGGLVQPGGSLRLSCAASG(F)                         | H5-26    |
| 1189.6000 | (F)NIKDTYIHW(V)                                      | H28-36   |
| 2225.1826 | (F)NIKDTYIHWVRQAPGKGLE(W)                            | H28-46   |
| 2411.2619 | (F)NIKDTYIHWVRQAPGKGLEW(V)                           | H28-47   |
| 1054.6004 | (W)VRQAPGKGLE(W)                                     | H37-46   |
| 1240.6797 | (W)VRQAPGKGLEW(V)                                    | H37-47   |
| 1176.6160 | (E)WVARIYPTNG(Y)                                     | H47-56   |
| 1462.7437 | (G)YTRYADSVKGRF(T)                                   | H57-68   |
| 1299.6804 | (Y)TRYADSVKGRF(T)                                    | H58-68   |
| 1271.6114 | (F)TISADTSKNTAY(L)                                   | H69-80   |
| 1075.5378 | (M)NSLRAEDTAV(Y)                                     | H84-93   |
| 1310.5259 | (V)YYCSRWGGDGF(Y)                                    | H94-104  |
| 1147.4626 | (Y)YCSRWGGDGF(Y)                                     | H95-104  |
| 2952.4983 | (L)VTVSSASTKGPSVFPLAPSSKSTSGGTAAL<br>GC(L)           | H116-147 |
| 2792.4676 | (L)VTVSSASTKGPSVFPLAPSSKSTSGGTAAL(<br>G)             | H116-145 |
| 1366.7213 | (L)VTVSSASTKGPSVF(P)                                 | H116-129 |
| 2679.3836 | (L)VTVSSASTKGPSVFPLAPSSKSTSGGTAAL(L<br>)             | H116-144 |
| 1444.7642 | (F)PLAPSSKSTSGGTAAL(G)                               | H130-145 |
| 1307.6882 | (C)LVKDYFPEPVT(V)                                    | H148-158 |
| 1194.6041 | (L)VKDYFPEPVT(V)                                     | H149-158 |
| 1293.6725 | (L)VKDYFPEPVTV(S)                                    | H149-159 |
| 1943.0021 | (T)VSWNSGALTSGVHTFPAVL(Q)                            | H159-177 |
| 1562.7598 | (T)VSWNSGALTSGVHTF(P)                                | H159-173 |
| 1843.9337 | (V)SWNSGALTSGVHTFPAVL(Q)                             | H160-177 |
| 676.3665  | (L)LGGPSVF(L)                                        | H238-244 |
| 1433.7861 | (V)FLFPPKPKDTLM(I)                                   | H244-255 |
| 2832.5038 | (V)FLFPPKPKDTLMISRTPEVTCVVVD(V)                      | H244-268 |
| 1286.7177 | (F)LFPPKPKDTLM(I)                                    | H245-255 |
| 1026.5652 | (F)PPKPKDTLM(I)                                      | H247-255 |
| 1136.5438 | (L)MISRTPEVTC(V)                                     | H255-264 |
| 1005.5034 | (M)ISRTPEVTC(V)                                      | H256-264 |
| 902.4942  | (M)ISRTPEVT(C)                                       | H256-263 |
| 1898.9283 | (C)VVDVSHEDPEVKFNW(Y)                                | H265-280 |
| 1700.7915 | (V)VDVSHEDPEVKFNW(Y)                                 | H267-280 |
| 1486.6961 | (D)VSHEDPEVKFNW(Y)                                   | H269-280 |
| 4171.8209 | (W)YVDGVEVHNAKTKPREEQYNSTY(R)*                       | H281-303 |
| 672.4403  | (Y)RVVSVL(T)                                         | H304-309 |
| 1439.7278 | (L)TVLHQDWLNGKE(Y)                                   | H310-321 |
| 3081.6190 | (L)TVLHQDWLNGKEYKCKVSNKALPAPIE(K)                    | H310-336 |
| 4729.5610 | (L)TVLHQDWLNGKEYKCKVSNKALPAPIEKTIS<br>KAKGQPREPQV(Y) | H310-351 |
| 1239.6117 | (V)LHQDWLNGKE(Y)                                     | H312-321 |

|           |                                              |          |
|-----------|----------------------------------------------|----------|
| 3308.8511 | (E)YKCKVSNKALPAPIEKTISKAKGQPPEPQV(Y)         | H322-351 |
| 4252.3275 | (E)YKCKVSNKALPAPIEKTISKAKGQPPEPQVYTLPPSRE(E) | H322-359 |
| 2610.4362 | (E)KTISKAKGQPPEPQVYTLPPSRE(E)                | H337-359 |
| 1666.9599 | (E)KTISKAKGQPPEPQV(Y)                        | H337-351 |
| 962.4942  | (V)YTLPPSRE(E)                               | H352-359 |
| 1049.5296 | (E)EMTKNQVSL(T)                              | H360-368 |
| 1106.5874 | (M)TKNQVSLTCL(V)                             | H362-371 |
| 912.4462  | (L)VKGFYPSD(I)                               | H372-379 |
| 431.2500  | (D)IAVE(W)                                   | H380-383 |
| 2302.0986 | (A)VEWESNGQPENNYKTTTPVL(D)                   | H382-401 |
| 2073.9876 | (E)WESNGQPENNYKTTTPVL(D)                     | H384-401 |
| 1174.4760 | (E)WESNGQPENN(Y)                             | H384-393 |
| 918.5295  | (N)YKTTTPVL(D)                               | H394-401 |
| 770.4447  | (F)FLYSKL(T)                                 | H408-413 |
| 1564.7867 | (L)TVDKSRWQQGNVF(S)                          | H414-426 |
| 2526.1864 | (F)SCSVMHEALHNHYTQKSLSLSPG(-)                | H427-449 |
| 2336.1452 | (C)SVMHEALHNHYTQKSLSLSPG(-)                  | H429-449 |
| 2249.1132 | (S)VMHEALHNHYTQKSLSLSPG(-)                   | H430-449 |

\* 4171.8209 is the monoisotopic mass for H281-303 with G0F glycosylation.

**Table S-14.** Light- and heavy-chain peptides identified from an overnight in-solution peptic digest of **Avastin**.

| m/z of [M+H] <sup>+</sup> | Peptide Sequence                 | Amino Acids |
|---------------------------|----------------------------------|-------------|
| 1105.5848                 | (L)SASVGDRVTIT(C)                | L12-22      |
| 1208.5940                 | (L)SASVGDRVTITC(S)               | L12-23      |
| 1295.6260                 | (L)SASVGDRVTITCS(A)              | L12-24      |
| 1933.0694                 | (L)NWYQQKPGKAPKVLIIY(F)          | L34-49      |
| 1356.7998                 | (W)YQQKPGKAPKVL(I)               | L36-47      |
| 1632.9472                 | (W)YQQKPGKAPKVLIIY(F)            | L36-49      |
| 1562.7558                 | (F)TSSLHSGVPSRFSGSG(S)           | L51-66      |
| 1681.7565                 | (L)HSGVPSRFSGSGSGTDF(T)          | L55-71      |
| 886.4530                  | (L)HSGVPSRF(S)                   | L55-62      |
| 1534.6881                 | (L)HSGVPSRFSGSGSGTD(F)           | L55-70      |
| 2439.3031                 | (Q)YSTVPWTFGQGTKVEIKRTVAA(P)     | L91-112     |
| 2722.4563                 | (Q)YSTVPWTFGQGTKVEIKRTVAAPSV(F)  | L91-115     |
| 2869.5247                 | (Q)YSTVPWTFGQGTKVEIKRTVAAPSVF(I) | L91-116     |



|           |                                      |          |
|-----------|--------------------------------------|----------|
| 1192.5885 | (V)FIFPPSDEQL(K)                     | L116-125 |
| 1045.5201 | (F)IFPPSDEQL(K)                      | L117-125 |
| 649.3515  | (L)KSGTASV(V)                        | L126-132 |
| 1052.5160 | (L)LNNFYPRE(A)                       | L136-143 |
| 3035.4970 | (L)LNNFYPREAKVQWKVDNALQSGNSQE(S)     | L136-161 |
| 1271.7106 | (E)AKVQWKVDNAL(Q)                    | L144-154 |
| 2001.9988 | (E)AKVQWKVDNALQSGNSQE(S)             | L144-161 |
| 1834.8189 | (E)SVTEQDSKDSTYSLSST(L)              | L162-178 |
| 1998.0001 | (T)LTLSKADYEKHKVYACE(V)              | L179-195 |
| 1884.9160 | (L)TLISKADYEKHKVYACE(V)              | L180-195 |
| 2047.0025 | (E)VTHQGLSSPVTKSFNRGEC(-)            | L196-214 |
| 1237.5994 | (S)PVTKSFNRGEC(-)                    | L204-214 |
| 2002.0022 | (L)VESGGGLVQPGGSLRLSCAASG(Y)         | H5-26    |
| 1240.6797 | (N)WVRQAPGKGLE(W)                    | H36-46   |
| 1426.7590 | (N)WVRQAPGKGLEW(V)                   | H36-47   |
| 1768.9282 | (N)WVRQAPGKGLEWVGW(I)                | H36-50   |
| 1582.8489 | (W)VRQAPGKGLEWVGW(I)                 | H37-50   |
| 1240.6797 | (W)VRQAPGKGLEW(V)                    | H37-47   |
| 2336.1458 | (G)WINTYTGEPTYAADFKRRF(T)            | H50-68   |
| 1001.5679 | (D)FKRRFTF(S)                        | H64-70   |
| 1316.7110 | (D)FKRRFTFSLD(T)                     | H64-73   |
| 1201.6840 | (D)FKRRFTFSL(D)                      | H64-72   |
| 1054.6156 | (F)KRRFTFSL(D)                       | H65-72   |
| 1075.5378 | (M)NSLRAEDTAV(Y)                     | H84-93   |
| 2234.9429 | (V)YYCAKYPHYYGSSHWFYF(D)             | H94-110  |
| 1075.5419 | (F)DVWGQGTTLVT(V)                    | H111-120 |
| 2792.4676 | (L)VTVSSASTKGPSVFPLAPSSKSTSGGTAAL(G) | H119-148 |
| 1366.7213 | (L)VTVSSASTKGPSVF(P)                 | H119-132 |
| 1444.7642 | (F)PLAPSSKSTSGGTAAL(G)               | H133-148 |
| 1604.7948 | (F)PLAPSSKSTSGGTAALGC(L)             | H133-150 |
| 1307.6882 | (C)LVKDYFPEPVT(V)                    | H151-161 |
| 1194.6041 | (L)VKDYFPEPVT(V)                     | H152-161 |
| 1604.7955 | (Y)FPEPVTVSWNSGALT(S)                | H156-170 |
| 1278.6325 | (V)TVSWNSGALTSGV(H)                  | H161-173 |
| 1562.7598 | (T)VSWNSGALTSGVHTF(P)                | H162-176 |
| 1943.0021 | (T)VSWNSGALTSGVHTFPAVL(Q)            | H162-180 |
| 1843.9337 | (V)SWNSGALTSGVHTFPAVL(Q)             | H163-180 |
| 1176.6107 | (V)VTVPSSSLGTQT(Y)                   | H192-203 |

|           |                                                  |          |
|-----------|--------------------------------------------------|----------|
| 1433.7861 | (V)FLFPPKPKDTLM(I)                               | H247-258 |
| 1286.7177 | (F)LFPPKPKDTLM(I)                                | H248-258 |
| 1173.6336 | (L)FPPKPKDTLM(I)                                 | H249-258 |
| 1026.5652 | (F)PPKPKDTLM(I)                                  | H250-258 |
| 1005.5034 | (M)ISRTPEVTC(V)                                  | H259-267 |
| 1898.9283 | (C)VVDVSHEDPEVKFNW(Y)                            | H268-283 |
| 1799.8599 | (V)VVDVSHEDPEVKFNW(Y)                            | H269-283 |
| 1601.7231 | (V)DVSHEDPEVKFNW(Y)                              | H271-283 |
| 1486.6961 | (D)VSHEDPEVKFNW(Y)                               | H272-283 |
| 4171.8209 | (W)YVDGVEVHNAKTKPREEQYNSTY(R)*                   | H284-306 |
| 3737.6407 | (G)VEVHNAKTKPREEQYNSTY(R)**                      | H288-306 |
| 672.4403  | (Y)RVVSVL(T)                                     | H307-312 |
| 1439.7278 | (L)TVLHQDWLNGKE(Y)                               | H313-324 |
| 3081.6190 | (L)TVLHQDWLNGKEYKCKVSNKALPAPIE(K)                | H313-339 |
| 1239.6117 | (V)LHQDWLNGKE(Y)                                 | H315-324 |
| 3308.8511 | (E)YKCKVSNKALPAPIEKTISKAKGQPREPQV(Y)             | H325-354 |
| 4252.3275 | (E)YKCKVSNKALPAPIEKTISKAKGQPREPQV<br>YTLPPSRE(E) | H325-362 |
| 1666.9599 | (E)KTISKAKGQPREPQV(Y)                            | H340-354 |
| 2610.4362 | (E)KTISKAKGQPREPQVYTLPPSRE(E)                    | H340-362 |
| 962.4942  | (V)YTLPPSRE(E)                                   | H355-362 |
| 1049.5296 | (E)EMTKNQVSL(T)                                  | H363-371 |
| 912.4462  | (L)VKGFYPSD(I)                                   | H375-382 |
| 2302.0986 | (A)VEWESNGQPENNYKTTTPVL(D)                       | H385-404 |
| 2073.9876 | (E)WESNGQPENNYKTTTPVL(D)                         | H387-404 |
| 770.4447  | (F)FLYSKL(T)                                     | H411-416 |
| 1564.7867 | (L)TVDKSRWQQGNVF(S)                              | H417-429 |
| 2526.1864 | (F)SCSVMHEALHNHYTQKSLSLSPG(K)                    | H430-452 |
| 2336.1452 | (C)SVMHEALHNHYTQKSLSLSPG(K)                      | H432-452 |

\*4171.8209 is the monoisotopic mass for H284-306 with G0F glycosylation.

\*\*3737.6407 is the monoisotopic mass for H288-306 with G0F glycosylation.

**Table S-15.** Light- and heavy-chain peptides identified from an overnight in-solution peptic digest of **Rituxan**.

| m/z of [M+H] <sup>+</sup> | Peptide Sequence                                | Amino Acids |
|---------------------------|-------------------------------------------------|-------------|
| 715.3985                  | (L)SQSPAIL(S)                                   | L5-11       |
| 2099.0861                 | (Y)IHWFQQKPGSSPKWIY(A)                          | L32-48      |
| 1452.7077                 | (L)ASGVPVRFSGSGSGTS(Y)                          | L54-69      |
| 1615.7711                 | (L)ASGVPVRFSGSGSGTSY(S)                         | L54-70      |
| 1815.8872                 | (L)ASGVPVRFSGSGSGTSYSL(T)                       | L54-72      |
| 1916.9348                 | (L)ASGVPVRFSGSGSGTSYSLT(I)                      | L54-73      |
| 1462.7384                 | (Y)SLTISRVEAEDAAT(Y)                            | L71-84      |
| 1219.6165                 | (Y)SLTISRVEAED(A)                               | L71-81      |
| 1462.7325                 | (Q)WTSNPPTFGGGTKL(E)                            | L90-103     |
| 1317.7525                 | (L)EIKRTVAAPSVF(I)                              | L104-115    |
| 1045.5201                 | (F)IFPPSDEQL(K)                                 | L116-124    |
| 1998.0113                 | (L)KSGTASVCLLNFPRE(A)                           | L125-142    |
| 1052.516                  | (L)LNFPRE(A)                                    | L135-142    |
| 3035.497                  | (L)LNFPREAKVQWKVDNALQSGNSQE(S)                  | L135-160    |
| 2001.9988                 | (E)AKVQWKVDNALQSGNSQE(S)                        | L143-160    |
| 2089.0309                 | (E)AKVQWKVDNALQSGNSQES(V)                       | L143-161    |
| 1559.7071                 | (E)SVTEQDSKDSTYSL(S)                            | L161-174    |
| 1834.8189                 | (E)SVTEQDSKDSTYSLSST(L)                         | L161-177    |
| 1998.0001                 | (T)LTLSKADYEKHKVYACE(V)                         | L178-194    |
| 1694.9112                 | (T)LTLSKADYEKHKVY(A)                            | L178-191    |
| 1884.916                  | (L)TLKADYEKHKVYACE(V)                           | L179-194    |
| 1670.7843                 | (L)SKADYEKHKVYACE(V)                            | L181-194    |
| 2047.0025                 | (E)VTHQGLSSPVTKSFNRGEC(-)                       | L195-213    |
| 1943.0089                 | (Q)LQQPGAELVKPGASVKMSC(K)                       | H4-22       |
| 4089.9552                 | (C)KASGYTFTSYNMHWVKQTPGRGLEWIGAI<br>YPGNGDTS(Y) | H23-59      |
| 773.3828                  | (C)KASGYTF(T)                                   | H23-29      |
| 2360.1604                 | (F)TSYNMHWVKQTPGRGLEWIG(A)                      | H30-49      |
| 1874.9330                 | (F)TSYNMHWVKQTPGRGL(E)                          | H30-45      |
| 2009.0174                 | (Y)NMHWVKQTPGRGLEWIG(A)                         | H33-49      |
| 1005.5040                 | (L)EWIGAIYPG(N)                                 | H46-54      |
| 2273.1561                 | (G)AIYPGNGDTSYNQKFKGKATL(T)                     | H50-70      |
| 1925.9716                 | (Y)PGNGDTSYNQKFKGKATL(T)                        | H53-70      |
| 1134.6630                 | (Y)NQKFKGKATL(T)                                | H61-70      |
| 1030.4687                 | (L)TADKSSSTAY(M)                                | H71-80      |

|           |                                                  |          |
|-----------|--------------------------------------------------|----------|
| 1092.4415 | (Y)CARSTYYGGD(W)                                 | H96-105  |
| 1005.5000 | (F)NVWGAGTTVT(V)                                 | H109-118 |
| 2776.4727 | (T)VTVSAASTKGPSVFPLAPSSKSTSGGTAAL(G)             | H117-146 |
| 2736.3873 | (T)VSAASTKGPSVFPLAPSSKSTSGGTAALGC(L)             | H119-148 |
| 2576.3566 | (T)VSAASTKGPSVFPLAPSSKSTSGGTAAL(G)               | H119-146 |
| 2319.2191 | (A)ASTKGPSVFPLAPSSKSTSGGTAAL(G)                  | H122-146 |
| 1444.7642 | (F)PLAPSSKSTSGGTAAL(G)                           | H131-146 |
| 1604.7948 | (F)PLAPSSKSTSGGTAALGC(L)                         | H131-148 |
| 2009.0015 | (C)LVKDYFPEPVTVSWNSGA(L)                         | H149-166 |
| 1194.6041 | (L)VKDYFPEPVT(V)                                 | H150-159 |
| 1293.6725 | (L)VKDYFPEPVTV(S)                                | H150-160 |
| 1943.0021 | (T)VSWNSGALTSGVHTFPAVL(Q)                        | H160-178 |
| 1562.7598 | (T)VSWNSGALTSGVHTF(P)                            | H160-174 |
| 1843.9337 | (V)SWNSGALTSGVHTFPAVL(Q)                         | H161-178 |
| 1241.6888 | (A)LTSGVHTFPAVL(Q)                               | H167-178 |
| 1275.6791 | (S)VVTVPSSSLGTQT(Y)                              | H189-201 |
| 1176.6107 | (V)VTVPSSSLGTQT(Y)                               | H190-201 |
| 1005.5034 | (D)KKAEPKSCD(K)                                  | H217-225 |
| 2267.0617 | (D)KKAEPKSCDKTHTCPPCAPE(L)                       | H217-237 |
| 676.3665  | (L)LGGPSVF(L)                                    | H239-245 |
| 1433.7861 | (V)FLFPPKPKDTLM(I)                               | H245-256 |
| 1286.7177 | (F)LFPPKPKDTLM(I)                                | H246-256 |
| 929.5091  | (L)FPPKPKDT(L)                                   | H247-254 |
| 1026.5652 | (F)PPKPKDTLM(I)                                  | H248-256 |
| 1005.5034 | (M)ISRTPEVTC(V)                                  | H257-265 |
| 1302.7086 | (M)ISRTPEVTCVV(D)                                | H257-268 |
| 1898.9283 | (C)VVDVSHEDPEVKFNW(Y)                            | H266-281 |
| 1601.7231 | (V)DVSHEDPEVKFNW(Y)                              | H269-281 |
| 1486.6961 | (D)VSHEDPEVKFNW(Y)                               | H270-281 |
| 4171.8209 | (W)YVDGVEVHNAKTKPREEQYNSTY(R)*                   | H282-304 |
| 3737.6407 | (G)VEVHNAKTKPREEQYNSTY(R)**                      | H286-304 |
| 672.4403  | (Y)RVVSVL(T)                                     | H305-310 |
| 4729.5610 | (L)TVLHQDWLNGKEYKCKVSNKALPAPIEKTISKAKGQPREPQV(Y) | H311-352 |
| 1439.7278 | (L)TVLHQDWLNGKE(Y)                               | H311-322 |
| 3081.6190 | (L)TVLHQDWLNGKEYKCKVSNKALPAPIE(K)                | H311-337 |
| 1239.6117 | (V)LHQDWLNGKE(Y)                                 | H313-322 |

|           |                                                       |          |
|-----------|-------------------------------------------------------|----------|
| 1660.9091 | (E)YKCKVSNKALPAPIE(K)                                 | H323-337 |
| 3308.8511 | (E)YKCKVSNKALPAPIEKTISKAKGQPREPQV(Y)                  | H323-352 |
| 5250.8671 | (E)YKCKVSNKALPAPIEKTISKAKGQPREPQVYTLPPSRDELTKNQVSL(T) | H323-369 |
| 4480.4385 | (E)YKCKVSNKALPAPIEKTISKAKGQPREPQVYTLPPSRDEL(T)        | H323-362 |
| 3608.9759 | (E)KTISKAKGQPREPQVYTLPPSRDELTKNQVSL(T)                | H338-369 |
| 2838.5472 | (E)KTISKAKGQPREPQVYTLPPSRDEL(T)                       | H338-362 |
| 1666.9599 | (E)KTISKAKGQPREPQV(Y)                                 | H338-352 |
| 1961.0338 | (V)YTLPPSRDELTKNQVSL(T)                               | H353-369 |
| 1583.8388 | (L)PPSRDELTKNQVSL(T)                                  | H356-369 |
| 2598.3272 | (L)TKNQVSLTCLVKGFYPSDIAVEW(E)                         | H363-385 |
| 2302.0986 | (A)VEWESNGQPENNYKTTTPVL(D)                            | H383-402 |
| 2073.9876 | (E)WESNGQPENNYKTTTPVL(D)                              | H385-402 |
| 770.4447  | (F)FLYSKL(T)                                          | H409-414 |
| 1564.7867 | (L)TVDKSRWQQGNVF(S)                                   | H415-427 |
| 2526.1864 | (F)SCSVMHEALHNHYTQKSLSLSPG(K)                         | H428-450 |

\*4171.8209 is the monoisotopic mass for H282-304 with G0F glycosylation.

\*\*3737.6407 is the monoisotopic mass for H286-304 with G0F glycosylation.

**Table S-16.** Light- and heavy-chain peptides identified from an overnight in-solution peptic digest of **Vectibix**.

| m/z of [M+H] <sup>+</sup> | Peptide Sequence                 | Amino Acids |
|---------------------------|----------------------------------|-------------|
| 1336.6525                 | (L)SASVGDRVTITCQ(A)              | L12-24      |
| 1407.6897                 | (L)SASVGDRVTITCQA(S)             | L12-25      |
| 1834.0010                 | (N)YLNWYQQKPGKAPKL(L)            | L32-46      |
| 1670.9377                 | (L)NWYQQKPGKAPKLL(I)             | L34-47      |
| 1257.7314                 | (W)YQQKPGKAPKL(L)                | L36-46      |
| 1483.8995                 | (W)YQQKPGKAPKLLI(Y)              | L36-48      |
| 1669.9636                 | (Y)QQKPGKAPKLLIYDA(S)            | L37-51      |
| 1653.7715                 | (N)LETGVPSRFSGSGSGTD(F)          | L54-70      |
| 1979.9637                 | (D)FTFTISLQPEDATYF(C)            | L71-87      |
| 3288.5710                 | (D)FTFTISLQPEDATYFCQHFHDLPLAF(G) | L71-98      |

|           |                                           |          |
|-----------|-------------------------------------------|----------|
| 1490.6885 | (T)YFCQHFDHLPLA(F)                        | L86-97   |
| 2266.0750 | (T)YFCQHFDHLPLAFGGGTKVE(I)                | L86-105  |
| 3005.5454 | (T)YFCQHFDHLPLAFGGGTKVEIKRTVAA(P)         | L86-112  |
| 3288.6986 | (T)YFCQHFDHLPLAFGGGTKVEIKRTVAAPS<br>V(F)  | L86-115  |
| 3435.7671 | (T)YFCQHFDHLPLAFGGGTKVEIKRTVAAPS<br>VF(I) | L86-116  |
| 2842.4821 | (Y)FCQHFDHLPLAFGGGTKVEIKRTVAA(P)          | L87-112  |
| 1386.8063 | (F)GGGTKVEIKRTVAA(P)                      | L99-112  |
| 1669.9595 | (F)GGGTKVEIKRTVAAPSV(F)                   | L99-115  |
| 1817.0280 | (F)GGGTKVEIKRTVAAPSVF(I)                  | L99-116  |
| 1045.5201 | (F)IFPPSDEQL(K)                           | L117-125 |
| 1165.6000 | (C)LLNNFYPRE(A)                           | L135-143 |
| 1052.5160 | (L)LNNFYPRE(A)                            | L136-143 |
| 3035.4970 | (L)LNNFYPREAKVQWKVDNALQSGNSQE(S)          | L136-161 |
| 2001.9988 | (E)AKVQWKVDNALQSGNSQE(S)                  | L144-161 |
| 1389.6605 | (W)KVDNALQSGNSQE(S)                       | L149-161 |
| 1463.6609 | (D)NALQSGNSQESVTE(Q)                      | L152-165 |
| 1559.7071 | (E)SVTEQDSKDSTYSL(S)                      | L162-175 |
| 1694.9112 | (T)LTLSKADYEKHKVY(A)                      | L179-192 |
| 1998.0001 | (T)LTLSKADYEKHKVYACE(V)                   | L179-195 |
| 1581.8271 | (L)TLSKADYEKHKVY(A)                       | L180-192 |
| 1884.9160 | (L)TLSKADYEKHKVYACE(V)                    | L180-195 |
| 1490.6944 | (V)YACEVTHQGLSSPV(T)                      | L192-205 |
| 2047.0025 | (E)VTHQGLSSPVTKSFNRGEC(-)                 | L196-214 |
| 1328.6692 | (L)QESGGLVKPSET(L)                        | H5-17    |
| 1456.7696 | (T)WIRQSPGKGLEW(I)                        | H38-49   |
| 3250.6069 | (T)WIRQSPGKGLEWIGHIYSGNTNYNPSL(K<br>)     | H38-65   |
| 1854.0021 | (W)IRQSPGKGLEWIGHIY(Y)                    | H39-54   |
| 3064.5275 | (W)IRQSPGKGLEWIGHIYSGNTNYNPSL(K)          | H39-65   |
| 3435.7556 | (I)RQSPGKGLEWIGHIYSGNTNYNPSLKSRL<br>(T)   | H40-69   |
| 2127.9770 | (L)EWIGHIYSGNTNYNPSL(K)                   | H48-65   |
| 1812.8551 | (W)IGHIYSGNTNYNPSL(K)                     | H50-65   |
| 1240.6420 | (L)TISIDTSKTQF(S)                         | H70-80   |
| 834.4931  | (F)SLKLSSVT(A)                            | H81-88   |
| 2035.9542 | (A)ADTAIYYCVRDRVTFGAFD(I)                 | H90-107  |

|           |                                                      |          |
|-----------|------------------------------------------------------|----------|
| 3256.6419 | (C)VRDRVTGAFDIWGQGTMTVSSASTKGP<br>SVF(P)             | H98-128  |
| 1336.6566 | (D)IWGQGTMTVSSA(S)                                   | H108-120 |
| 1366.7213 | (M)VTVSSASTKGPSVF(P)                                 | H115-128 |
| 2495.2446 | (M)VTVSSASTKGPSVFPLAPCSRSTSE(S)                      | H115-139 |
| 2683.3243 | (M)VTVSSASTKGPSVFPLAPCSRSTSEST(A)                    | H115-141 |
| 2938.4826 | (M)VTVSSASTKGPSVFPLAPCSRSTSESTAA<br>L(G)             | H115-144 |
| 1166.6052 | (T)VSSASTKGPSVF(P)                                   | H117-128 |
| 2483.2082 | (T)VSSASTKGPSVFPLAPCSRSTSEST(A)                      | H117-141 |
| 1307.6882 | (C)LVKDYFPEPVT(V)                                    | H147-157 |
| 1194.6041 | (L)VKDYFPEPVT(V)                                     | H148-157 |
| 2938.4945 | (F)PEPVTVSWNSGALTSGVHTFPAVLQSSGL<br>(Y)              | H153-181 |
| 1562.7598 | (T)VSWNSGALTSGVHTF(P)                                | H158-172 |
| 1943.0021 | (T)VSWNSGALTSGVHTFPAVL(Q)                            | H158-176 |
| 1128.6048 | (L)TSGVHTFPAVL(Q)                                    | H166-176 |
| 1240.6420 | (V)LQSSGLYSLSSV(V)                                   | H176-187 |
| 850.4305  | (V)VTVSSNF(G)                                        | H188-195 |
| 2178.0496 | (T)YTCNVDHKPSNTKVDKTVE(R)                            | H200-218 |
| 1194.5969 | (D)KTVERKCCVE(C)                                     | H215-224 |
| 1433.7861 | (V)FLFPPKPKDTLM(I)                                   | H239-250 |
| 1286.7177 | (F)LFPPKPKDTLM(I)                                    | H240-250 |
| 1173.6336 | (L)FPPKPKDTLM(I)                                     | H241-250 |
| 1026.5652 | (F)PPKPKDTLM(I)                                      | H242-250 |
| 1005.5034 | (M)ISRTPEVTC(V)                                      | H251-259 |
| 1104.5718 | (M)ISRTPEVTCV(V)                                     | H251-260 |
| 3646.7370 | (M)ISRTPEVTCVVVDVSHEDPEVQFNWYVD<br>GVEV(H)           | H251-282 |
| 1598.7697 | (C)VVDVSHEDPEVQF(N)                                  | H260-273 |
| 1499.7013 | (V)VVDVSHEDPEVQF(N)                                  | H261-273 |
| 1186.5375 | (D)VSHEDPEVQF(N)                                     | H264-273 |
| 4139.8311 | (W)YVDGVEVHNAKTKPREEQFNSTF(R)*                       | H276-298 |
| 672.4403  | (F)RVVSVL(T)                                         | H299-304 |
| 1425.7121 | (L)TVVHQDWLNGKE(Y)                                   | H305-316 |
| 3053.5877 | (L)TVVHQDWLNGKEYKCKVSNKGLPAPIE(K)                    | H305-331 |
| 4731.5403 | (L)TVVHQDWLNGKEYKCKVSNKGLPAPIEKT<br>ISKTKGQPREPQV(Y) | H305-346 |
| 1646.8934 | (E)YKCKVSNKGLPAPIE(K)                                | H317-331 |

|           |                                              |          |
|-----------|----------------------------------------------|----------|
| 3324.8460 | (E)YKCKVSNKGLPAPIEKTISKTKGQPREPQV(Y)         | H317-346 |
| 4268.3224 | (E)YKCKVSNKGLPAPIEKTISKTKGQPREPQVYTLPPSRE(E) | H317-354 |
| 2930.6786 | (C)KVSNNKGLPAPIEKTISKTKGQPREPQV(Y)           | H320-346 |
| 1696.9704 | (E)KTISKTKGQPREPQV(Y)                        | H332-346 |
| 2640.4468 | (E)KTISKTKGQPREPQVYTLPPSRE(E)                | H332-354 |
| 962.4942  | (V)YTLPPSRE(E)                               | H347-354 |
| 1049.5296 | (E)EMTKNQVSL(T)                              | H355-363 |
| 912.4462  | (L)VKGFYPSD(I)                               | H367-374 |
| 431.2500  | (D)IAVE(W)                                   | H375-378 |
| 2105.9597 | (E)WESNGQPENNYKTTTPML(D)                     | H379-396 |
| 770.4447  | (F)FLYSKL(T)                                 | H403-408 |
| 1564.7867 | (L)TVDKSRWQQGNVF(S)                          | H409-421 |
| 2526.1864 | (F)SCSVMHEALHNHYTQKSLSLSPG(K)                | H422-444 |
| 2336.1452 | (C)SVMHEALHNHYTQKSLSLSPG(K)                  | H424-444 |

\*4139.8311 is the monoisotopic mass for H276-298 with G0F glycosylation.

**Table S-17.** Light- and heavy-chain peptides identified from an overnight in-solution tryptic digest of **Herceptin**.

| m/z of [M+H] <sup>+</sup> | Peptide Sequence                                                    | Amino Acids | Missed cleavages |
|---------------------------|---------------------------------------------------------------------|-------------|------------------|
| 1878.8862                 | (-)DIQMTQSPSSLSASVGDR(V)                                            | L1-18       | 0                |
| 1990.9981                 | (R)ASQDVNTAVAWYQQKPGK(A)                                            | L25-42      | 0                |
| 1772.9581                 | (K)LLIYSASFLYSGVPSR(F)                                              | L46-61      | 0                |
| 4187.9179                 | (R)SGTDFTLTISLQPEDFATYYC<br>(Carbamidomethyl)QQHYTTPPTF<br>GQGTK(V) | L67-103     | 0                |
| 1946.0270                 | (R)TVAAPSVFIFPPSDEQLK(S)                                            | L109-126    | 0                |
| 1797.8952                 | (K)SGTASVVC(Carbamidomethyl)<br>LLNNFYPR(E)                         | L127-142    | 0                |
| 3619.7093                 | (K)VDNALQSGNSQESVTEQDSK<br>DSTYLSSTLTLSK(A)                         | L150-183    | 1                |
| 1502.7584                 | (K)DSTYLSSTLTLSK(A)                                                 | L170-183    | 0                |
| 1882.0029                 | (-)EVQLVESGGGLVQPGGSLR(L)                                           | H1-19       | 0                |
| 1895.9763                 | (K)GLEWVARIYPTNGYTR(Y)                                              | H44-69      | 1                |
| 1845.9341                 | (R)YADSVKGRFTISADTSK(N)                                             | H60-76      | 1                |
| 2784.2610                 | (R)WGGDGFYAMDYWGQGLVT<br>VSSASTK(G)                                 | H99-124     | 0                |



|           |                                                                                                    |          |   |
|-----------|----------------------------------------------------------------------------------------------------|----------|---|
| 6713.3145 | (K)DYFPEPVTVSWNSGALTSGV<br>HTFPAVLQSSGLYSLSSVVTVPS<br>SSLGTQTYIC(Carbamidomethyl)N<br>VNHKPSNTK(V) | H151-213 | 0 |
| 2844.4575 | (K)THTC(Carbamidomethyl)PPC(C<br>arbamidomethyl)PAPELLGGPSVF<br>LFPPKPK(D)                         | H226-251 | 0 |
| 2139.0274 | (R)TPEVTC(Carbamidomethyl)VV<br>VDVSHEDPEVK(F)                                                     | H259-277 | 0 |
| 1677.8020 | (K)FNWYVDGVEVHNAK(T)                                                                               | H278-291 | 0 |
| 1808.0065 | (R)VVSVLTVLHQDWLNGK(E)                                                                             | H305-320 | 0 |
| 1161.6296 | (K)NQVSLTC(Carbamidomethyl)L<br>VK(G)                                                              | H364-373 | 0 |
| 2544.1314 | (K)GFYPSDIAVEWESNGQPENN<br>YK(T)                                                                   | H374-395 | 0 |
| 1873.9218 | (K)TTPPVLDSDGSFFLYSK(L)                                                                            | H396-412 | 0 |
| 2801.2671 | (R)WQQGNVFC(Carbamidometh<br>yl)SVMHEALHNHYTQK(S)                                                  | H420-442 | 0 |

**Table S-18.** Light- and heavy-chain peptides identified from an overnight in-solution tryptic digest of **Avastin**.

| m/z of [M+H] <sup>+</sup> | Peptide Sequence                                                          | Amino Acids | Missed cleavages |
|---------------------------|---------------------------------------------------------------------------|-------------|------------------|
| 1878.8862                 | (-)-DIQMTQSPSSLSASVGDR(V)                                                 | L1-18       | 0                |
| 2801.3563                 | (R)VTITC(Carbamidomethyl)SASQ<br>DISNYLNWYQQKPGK(A)                       | L19-42      | 0                |
| 1762.9486                 | (K)VLIYFTSSLHSGVPSR(F)                                                    | L46-61      | 0                |
| 4660.1137                 | (R)FSGSGSGTDFTLTISSLQPED<br>FATYYC(Carbamidomethyl)QQYS<br>TVPWTFGQGTK(V) | L62-103     | 0                |
| 1946.0270                 | (R)TVAAPSVFIFPPSDEQLK(S)                                                  | L109-126    | 0                |
| 1797.8952                 | (K)SGTASVVC(Carbamidomethyl)<br>LLNNFYPR(E)                               | L127-142    | 0                |
| 1502.7584                 | (K)DSTYSLSSTLTLSK(A)                                                      | L170-183    | 0                |
| 1882.0029                 | (-)-EVQLVESGGGLVQPGGSLR(L)                                                | H1-19       | 0                |
| 2197.9794                 | (R)LSC(Carbamidomethyl)AASGY<br>TFTNYGMNWVR(Q)                            | H20-38      | 0                |
| 2518.1925                 | (K)GLEWVGWINTYTGEPTYAADF<br>K(R)                                          | H44-65      | 0                |
| 2674.2936                 | (K)GLEWVGWINTYTGEPTYAADF<br>KR(R)                                         | H44-66      | 1                |
| 1045.5201                 | (R)FTFSLDTSK(S)                                                           | H68-76      | 0                |
| 3323.5433                 | (K)YPHYYGSSHWYFDVWGQGT<br>LTVSSASTK(G)                                    | H99-127     | 0                |

|           |                                                                                                   |          |   |
|-----------|---------------------------------------------------------------------------------------------------|----------|---|
| 6713.3145 | (K)DYFPEPVTVSWNSGALTSGV<br>HTFPAVLQSSGLYSLSSVTVPS<br>SSLGTQTYIC(Carbamidomethyl)N<br>VNHKPSNTK(V) | H154-216 | 0 |
| 2844.4575 | (K)THTC(Carbamidomethyl)PPC(C<br>arbamidomethyl)PAPELLGGPSVF<br>LFPPKPK(D)                        | H229-254 | 0 |
| 2139.0274 | (R)TPEVTC(Carbamidomethyl)VV<br>VDVSHEDPEVK(F)                                                    | H262-280 | 0 |
| 1677.8020 | (K)FNWYVDGVEVHNAK(T)                                                                              | H281-294 | 0 |
| 1808.0065 | (R)VVSVLTVLHQDWLNGK(E)                                                                            | H308-323 | 0 |
| 1161.6296 | (K)NQVSLTC(Carbamidomethyl)L<br>VK(G)                                                             | H367-376 | 0 |
| 2544.1314 | (K)GFYPSDIAVEWESNGQPENN<br>YK(T)                                                                  | H377-398 | 0 |
| 1873.9218 | (K)TTPPVLDSGDSFFLYSK(L)                                                                           | H399-415 | 0 |
| 2801.2671 | (R)VTITC(Carbamidomethyl)SASQ<br>DISNYLNWYQQKPGK(A)                                               | H423-445 | 0 |

**Table S-19.** Light- and heavy-chain peptides identified from an overnight in-solution tryptic digest of **Rituxan**.

| m/z of [M+H] <sup>+</sup> | Peptide Sequence                                      | Amino Acids | Missed cleavages |
|---------------------------|-------------------------------------------------------|-------------|------------------|
| 3933.0082                 | (R)ASSSVSYIHWFQQKPGSSPKP<br>WIYATSNLASGVPVR(F)        | L25-60      | 0                |
| 1606.7707                 | (R)FSGSGSGTSYSLTISR(V)                                | L61-76      | 0                |
| 2878.2625                 | (R)VEAEDAATYYC(Carbamidome<br>thyl)QQWTSNPPTFGGGTK(L) | L77-102     | 0                |
| 2102.1281                 | (K)RTVAAPSVFIFPPSDEQLK(S)                             | L107-125    | 1                |
| 1946.0270                 | (R)TVAAPSVFIFPPSDEQLK(S)                              | L108-125    | 0                |
| 1797.8952                 | (K)SGTASVVC(Carbamidomethyl)<br>LLNNFYPR(E)           | L126-141    | 0                |
| 3619.7093                 | (K)VDNALQSGNSQESVTEQDSK<br>DSTYLSSTLTLSK(A)           | L149-182    | 1                |
| 1502.7584                 | (K)DSTYLSSTLTLSK(A)                                   | L169-182    | 0                |
| 1875.9269                 | (K)VYAC(Carbamidomethyl)EVTH<br>QGLSSPVTK(S)          | L190-206    | 0                |
| 1960.0862                 | (-)QVQLQQPGAELVKPGASVK(M)                             | H1-19       | 0                |
| 1791.8159                 | (K)ASGYTFTSYNMHWVK(Q)                                 | H24-38      | 0                |
| 2183.0404                 | (R)GLEWIGAIYPGNGDTSYNQK(<br>F)                        | H44-63      | 0                |
| 2677.1756                 | (K)SSSTAYMQLSSLTSEDSAVYY<br>C(Carbamidomethyl)AR(S)   | H75-98      | 0                |

|           |                                                                                                    |          |   |
|-----------|----------------------------------------------------------------------------------------------------|----------|---|
| 2889.3366 | (R)STYYGGDWYFNVWGAGTTVT<br>VSAASTK(G)                                                              | H99-125  | 0 |
| 1186.6467 | (K)GPSVFPLAPSSK(S)                                                                                 | H126-137 | 0 |
| 6713.3145 | (K)DYFPEPVTVSWNSGALTSGV<br>HTFPAVLQSSGLYSLSSVVTVPS<br>SSLGTQTYIC(Carbamidomethyl)N<br>VNHKPSNTK(V) | H152-214 | 0 |
| 2844.4575 | (K)THTC(Carbamidomethyl)PPC(C<br>arbamidomethyl)PAPELLGGPSVF<br>LFPPKPK(D)                         | H227-252 | 0 |
| 2139.0274 | (R)TPEVTC(Carbamidomethyl)VV<br>VDVSHEDPEVK(F)                                                     | H260-278 | 0 |
| 1677.8020 | (K)FNWYVDGVEVHNAK(T)                                                                               | H279-292 | 0 |
| 1808.0065 | (R)VSVLTVLHQDWLNGK(E)                                                                              | H306-321 | 0 |
| 1872.9702 | (R)EPQVYTLPPSRDELTK(N)                                                                             | H349-364 | 1 |
| 2544.1314 | (K)GFYPSDIAVEWESNGQPENN<br>YK(T)                                                                   | H375-396 | 0 |
| 1873.9218 | (K)TTPPVLDSDGSFFLYSK(L)                                                                            | H397-413 | 0 |
| 2801.2671 | (R)WQQGNVFSC(Carbamidometh<br>yl)SVMHEALHNHYTQK(S)                                                 | H421-433 | 0 |

**Table S-20.** Light- and heavy-chain peptides identified from an overnight in-solution tryptic digest of **Vectibix**.

| m/z of [M+H] <sup>+</sup> | Peptide Sequence                                                             | Amino Acids | Missed cleavages |
|---------------------------|------------------------------------------------------------------------------|-------------|------------------|
| 2842.3829                 | (R)VTITC(Carbamidomethyl)QAS<br>QDISNYLNWYQQKPGK(A)                          | L19-42      | 0                |
| 1747.9225                 | (K)LLIYDASNLETGVPSR(F)                                                       | L46-61      | 0                |
| 4541.1031                 | (R)FSGSGSGTDFFTISSLQPEDI<br>ATYFC(Carbamidomethyl)QHFDH<br>LPLAFGGGTK(V)     | L62-103     | 0                |
| 1946.0270                 | (R)TVAAPSVFIFPPSDEQLK(S)                                                     | L109-126    | 0                |
| 1797.8952                 | (K)SGTASVVC(Carbamidomethyl)<br>LLNNFYPR(E)                                  | L127-142    | 0                |
| 3619.7093                 | (K)VDNALQSGNSQESVTEQDSK<br>DSTYLSSTLTLSK(A)                                  | L150-183    | 1                |
| 1502.7584                 | (K)DSTYLSSTLTLSK(A)                                                          | L170-183    | 0                |
| 4373.1394                 | (-)QVQLQESGPGLVKPSSETLSLT<br>C<br>(Carbamidomethyl)TVSGGSVSSG<br>DYYWTWIR(Q) | H1-40       | 0                |
| 2426.1775                 | (K)GLEWIGHIYYSGNTNYPNPSLK(<br>S)                                             | H46-66      | 0                |
| 977.5514                  | (R)LTISIDTSK(T)                                                              | H69-77      | 0                |

|           |                                                                                                       |          |   |
|-----------|-------------------------------------------------------------------------------------------------------|----------|---|
| 1789.8789 | (K)LSSVTAADTAIYYC(Carbamidomethyl)VR(D)                                                               | H84-99   | 0 |
| 2514.2293 | (R)DRVTFGAFDIWGQGTMTVSSASTK(G)                                                                        | H100-123 | 0 |
| 2243.1013 | (R)VTGAFDIWGQGTMTVSSASTK(G)                                                                           | H102-123 | 0 |
| 6763.2573 | (K)DYFPEPVTVSWNSGALTSGVHTFPAVLQSSGLYSLSSVTVPSNFGTQTYTC(Carbamidomethyl)NVDHKPSNTK(V)                  | H150-212 | 0 |
| 3036.4966 | (R)KC(Carbamidomethyl)C(Carbamidomethyl)VEC(Carbamidomethyl)PPC(Carbamidomethyl)PAPPVAGPSVFLFPPKPK(D) | H220-246 | 1 |
| 2908.4017 | (K)C(Carbamidomethyl)C(Carbamidomethyl)VEC(Carbamidomethyl)PPC(Carbamidomethyl)PAPPVAGPSVFLFPPKPK(D)  | H221-246 | 0 |
| 3797.7752 | (R)TPEVTC(Carbamidomethyl)VVDVSHEDPEVQFNWYVDGVEVHNAK(T)                                               | H254-286 | 0 |
| 1793.9908 | (R)VVSVLTVVHQDWLNGK(E)                                                                                | H300-315 | 0 |
| 3047.5540 | (R)EPQVYTLPPSREEMTKNQVSLTC(Carbamidomethyl)LVK(G)                                                     | H343-368 | 1 |
| 2544.1314 | (K)GFYPSDIAVEWESNGQPENNYK(T)                                                                          | H369-390 | 0 |
| 4370.1557 | (K)LTVDKSRWQQGNVFSC(Carbamidomethyl)SVMHEALHNHYTQKSLSLSPGK(-)                                         | H408-445 | 2 |
| 2801.2671 | (R)WQQGNVFSC(Carbamidomethyl)SVMHEALHNHYTQK(S)                                                        | H415-437 | 0 |

**Table S-21.** Herceptin sequence coverage from tryptic spin digestion of 0.1-mL solutions containing different amounts of antibody. Analysis employed nanoLC-MS/MS.

| ng  | fmol  | Coverage/% | Unique peptides |
|-----|-------|------------|-----------------|
| 1   | 6.7   | 15         | 9               |
| 5   | 33.3  | 34         | 20              |
| 10  | 66.7  | 37         | 24              |
| 25  | 166.7 | 43         | 26              |
| 50  | 333.3 | 49         | 33              |
| 100 | 666.7 | 73         | 47              |
